# Supplementary material for: Anion-driven encapsulation of cationic guests inside pyridine[4]arene dimers
Source: PubMed Central journal article supplement (PMC6839556; doi:10.3762/bjoc.15.241), 2019-10-21
Supplement: Beilstein_J_Org_Chem-15-2486-s001.pdf [file Beilstein_J_Org_Chem-15-2486-s001.pdf]

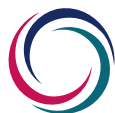

## Supporting Information

for

### **Anion-driven encapsulation of cationic guests inside pyridine[4]arene dimers**

Anniina Kiesilä, Jani O. Moilanen, Anneli Kruve, Christoph A. Schalley, Perdita Barran and Elina Kalenius

*Beilstein J. Org. Chem.* **2019**, *15*, 2486–2492. [doi:10.3762/bjoc.15.241](https://doi.org/10.3762/bjoc.15.241)

### **Experimental details and supplementary information**

## Table of Contents

|                                         |     |
|-----------------------------------------|-----|
| 1 Mass spectrometry .....               | S2  |
| 1.1 ESI-Q-TOF mass spectrometry.....    | S2  |
| 1.2 Ion mobility mass spectrometry..... | S2  |
| 1.3 IRMPD experiments .....             | S4  |
| 2 NMR .....                             | S6  |
| 3 Computational details.....            | S7  |
| References.....                         | S12 |
| XYZ Coordinates.....                    | S13 |

# 1 Mass spectrometry

## 1.1 ESI-Q-TOF mass spectrometry

Mass spectrometric experiments were performed with an ABSciex QSTAR Elite ESI-Q-TOF mass spectrometer, equipped with an API 200 TurbolonSpray ESI Source from AB Sciex. Nitrogen was used as the drying and nebulization gas. The parameters were optimized to get obtain the maximum abundance of the ions of interest. The measurements and data handling were done with Analyst® QS 2.0 software.

Complex formation was tested with a series of alkyl ammonium cations ( $\text{MeNH}_3^+$ ,  $\text{Me}_2\text{NH}_2^+$ ,  $\text{Me}_3\text{NH}^+$ ,  $\text{Me}_4\text{N}^+$ ,  $\text{EtNH}_3^+$ ,  $\text{Et}_2\text{NH}_2^+$ ,  $\text{Et}_4\text{N}^+$  and  $\text{Pr}_4\text{N}^+$ ) with  $\text{Cl}^-$ ,  $\text{Br}^-$ ,  $\text{I}^-$ ,  $\text{BF}_4^-$  or  $\text{PF}_6^-$  as the counterions. All salts were commercially available and used as received. Stock solutions of salts were prepared at 5 mM in MeOH or MeCN. A 5 mM stock solution of host **1** was prepared in  $\text{CHCl}_3$ . Samples for profile spectra measurements were prepared with 20  $\mu\text{M}$  host concentration and 1:3 host–guest ratio in acetone. From host **2**, a 5 mM stock solution was prepared in acetone. Mixed host experiments were carried out with 1:1:1 host<sub>1</sub>/host<sub>2</sub>/guest ratio (20  $\mu\text{M}$  each) diluted in MeCN.

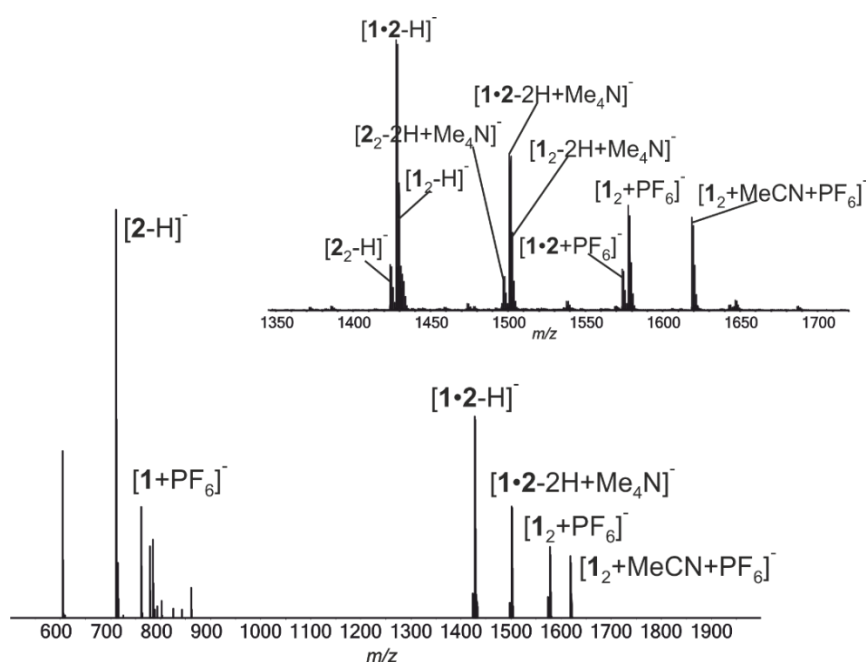

**Figure S1.** (-)ESIMS spectrum of the 1:1:1 mixture of **1**, **2**, and  $\text{TMAPF}_6$  in acetonitrile. Inset shows a zoom in for the region showing dimeric ions.

## 1.2 Ion mobility mass spectrometry

Ion mobility mass spectrometry experiments were performed with Waters Synapt G2 and Agilent 6560 Ion mobility Q-TOF mass spectrometers. All CCS values were obtained using nitrogen as drift gas and stepped-field methods. Samples were prepared with 10 or 20  $\mu\text{M}$  concentration and 1:3 host–guest ratio in acetone.

The modified Waters Synapt G2 was equipped with a linear drift cell, which was filled with ~2 Torr nitrogen (298 K). Samples were ionized with a nanoESI ion source. In-house pulled capillary tips were used with inserted platinum wire for nanoESI. Parameters were optimized as follows: Capillary voltage 2.01 kV, cone 50 V and source temperature 40 °C. Data was analyzed using MassLynx v4.1 (Waters Corporation, USA) and Microsoft Excel 2016 (Microsoft, USA).

The Agilent 6560 IM Q-TOF instrument was equipped with an ESI ion source and samples were injected with a flowrate of 5  $\mu\text{L}/\text{min}$ . The drift tube pressure was set at 3.95 Torr. The drift tube entrance and exit voltages were set to 1700 V and 224 V, respectively. The trap filling time was set to 20 000  $\mu\text{s}$  and the trap release time to 150  $\mu\text{s}$ . Other parameters were: gas temperature 275 °C, dry gas flow rate 5 L/min, nebulizer pressure 10 psi, and capillary voltage of -5000 V or 5000 V. Before introducing the samples, ES tuning mix (Agilent Technologies) was measured as a reference for CCS values and to ensure stable conditions for CCS determination [1,2]. For stepped-field measurements, the drift tube entrance voltage

was varied from 1100 V to 1700 V with 100 V increments. The data were analyzed using the MassHunter IM-MS Browser (Version B.08.00, Agilent Technologies, USA).

Theoretical CCS values were calculated with IMoS [3]. Theoretical  $^{DTM}CCS_{N_2}$  values were obtained using the trajectory method with diffuse scattering in nitrogen gas. Coordinates for calculations were obtained from DFT-calculated structures optimized at the PBE0-D3/def2-TZVP level of theory (for DFT calculations see section 3). The number of rotations was 3 with 300000 gas molecules per rotations. Calculations were carried out using experimental parameters (gas, temperature and pressure).

**Table S1.** Observed ions, their mass accuracies and CCS values. Theoretical  $^{DTM}CCS_{N_2}$  values shown for ions:  $[1_2+Me_4N_{endo}]^+$ ,  $[1_2+PF_6]^-$ ,  $[1_2+Acetone_{endo}+PF_6]^-$ . \* Obtained theoretical  $^{DTM}CCS_{N_2}$  value for  $[1_2+Me_4N_{exo1}]^+$  and  $[1_2+Me_4N_{exo2}]^+$  are  $415.6 \text{ \AA}^2$  and  $429.2 \text{ \AA}^2$ , respectively.

| $m/z$ | ion                    | $\Delta m/z$<br>(mDa) | experimental $^{DT}CCS_{N_2}$<br>( $\text{\AA}^2$ ) | theoretical<br>$^{DTM}CCS_{N_2}$ ( $\text{\AA}^2$ ) |
|-------|------------------------|-----------------------|-----------------------------------------------------|-----------------------------------------------------|
| 717   | $[1+H]^+$              | 0.39                  | $268.9 \pm 0.24$                                    |                                                     |
| 739   | $[1+Na]^+$             | 1.08                  | $276.8 \pm 0.25$                                    |                                                     |
| 1433  | $[1_2+H]^+$            | -0.39                 | $384.8 \pm 0.41$                                    |                                                     |
| 1455  | $[1_2+Na]^+$           | -0.65                 | $387.6 \pm 0.36$                                    |                                                     |
| 1506  | $[1_2+Me_4N]^+$        | 0.06                  | $385.6 \pm 0.40$                                    | 405.7 *                                             |
| 715   | $[1-H]^-$              | -0.06                 | $270.9 \pm 0.32$                                    |                                                     |
| 788   | $[1-2H+Me_4N]^-$       | -0.41                 | $278.6 \pm 0.22$                                    |                                                     |
| 861   | $[1+PF_6]^-$           | -0.46                 | $275.2 \pm 0.35$                                    |                                                     |
| 1431  | $[1_2-H]^-$            | -0.45                 | $387.0 \pm 0.44$                                    |                                                     |
| 1489  | $[1_2-H+Acetone]^-$    | 2.42                  | $388.5 \pm 0.47$                                    |                                                     |
| 1504  | $[1_2-2H+Me_4N]^-$     | 1.8                   | $389.9 \pm 0.41$                                    |                                                     |
| 1577  | $[1_2+PF_6]^-$         | 0.36                  | $395.9 \pm 0.50$                                    | 415.4                                               |
| 1635  | $[1_2+Acetone+PF_6]^-$ | 0.42                  | $397.3 \pm 0.49$                                    | 421.5                                               |
| 1650  | $[1_2-H+Me_4N+PF_6]^-$ | 0.41                  | $399.6 \pm 0.49$                                    |                                                     |
| 1796  | $[1_2+Me_4N+2PF_6]^-$  | 0.51                  | $404.1 \pm 0.52$                                    |                                                     |

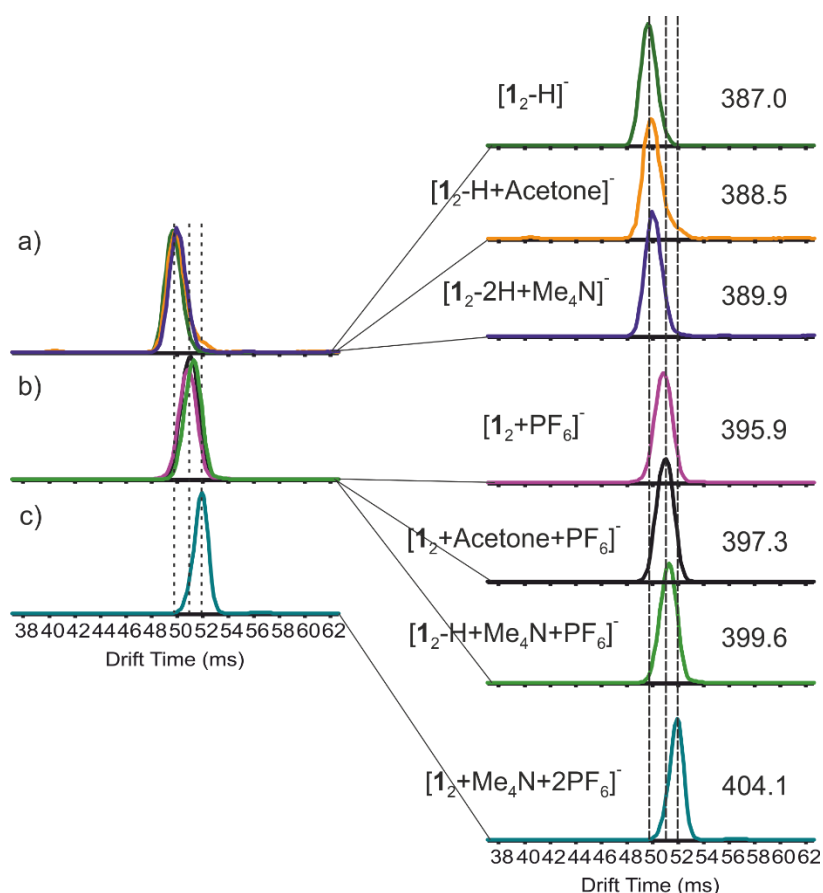

**Figure S2.** Arrival time distributions of the observed complexes in IM-MS experiments. In a) all the ions (empty dimer or dimers with *endo*-complexed guests) have the same drift times clearly evidencing that acetone and  $Me_4N^+$  are located inside the cavity of the dimeric pyridine[4]arene capsules. Ions carrying one *exo*-complexed anion (b) exhibit longer drift times. The drift time increases again, when a second anion is attached to the periphery of the capsule (c).

### 1.3 IRMPD experiments

IRMPD experiments were performed with Ionspec QFT-7 ESI-FT-ICR (Varian Inc., Lake Forest, CA, USA), equipped with a 7 T superconducting magnet. Samples were prepared in a same way as in ESI-Q-TOF experiments. Samples were injected with a flow rate of 2 or 5  $\mu\text{L}/\text{min}$ . A constant spray and highest intensities were achieved with a capillary voltage of 3500 V. The parameters for sample cone and extractor cone voltages were optimized for maximum abundances of the desired ion and were  $-60$  and  $-10$ , respectively. The source temperature was  $40\text{ }^\circ\text{C}$ .

The ternary complexes  $[1_2+Me_4N+2PF_6]^-$ ,  $[1_2+Me_4N+2BF_4]^-$  and  $[1_2+Me_4N+2I]^-$  were mass-selected and irradiated with a laser power of 95% (from a  $CO_2$  laser with 25 W maximum power) from 20 to 250 ms reaction intervals. All complexes showed similar dissociation behaviour as that of the hexafluorophosphate complex shown in Figure S3.

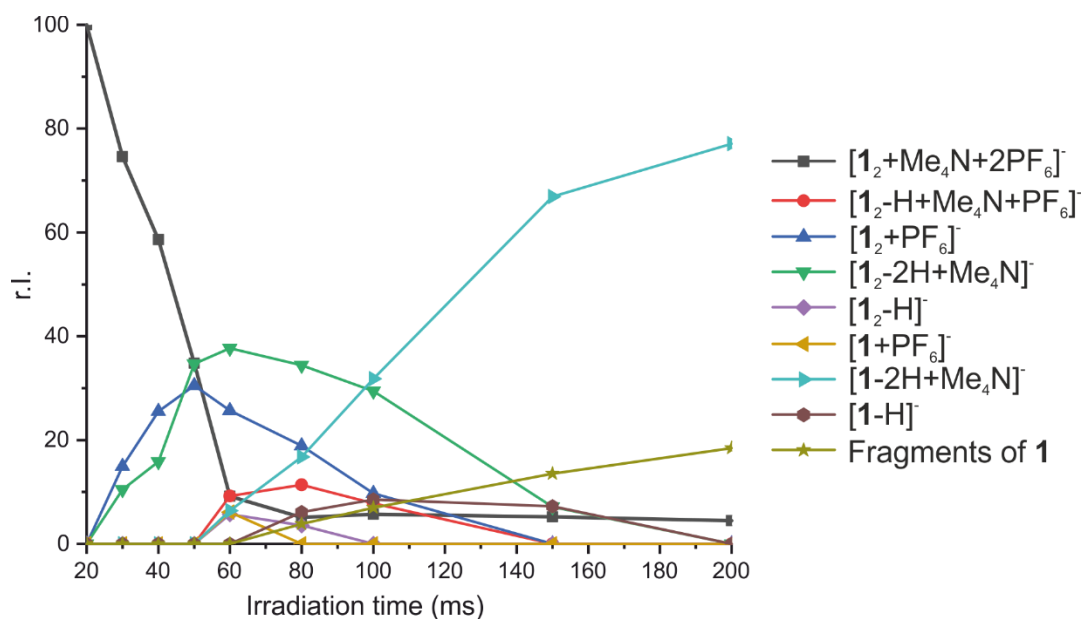

**Figure S3.** Dissociation of the ternary complex  $[1_2+\text{TMA}+2\text{PF}_6]^-$  in the IRMPD experiment with the intensity of the fragments plotted over the irradiation time.

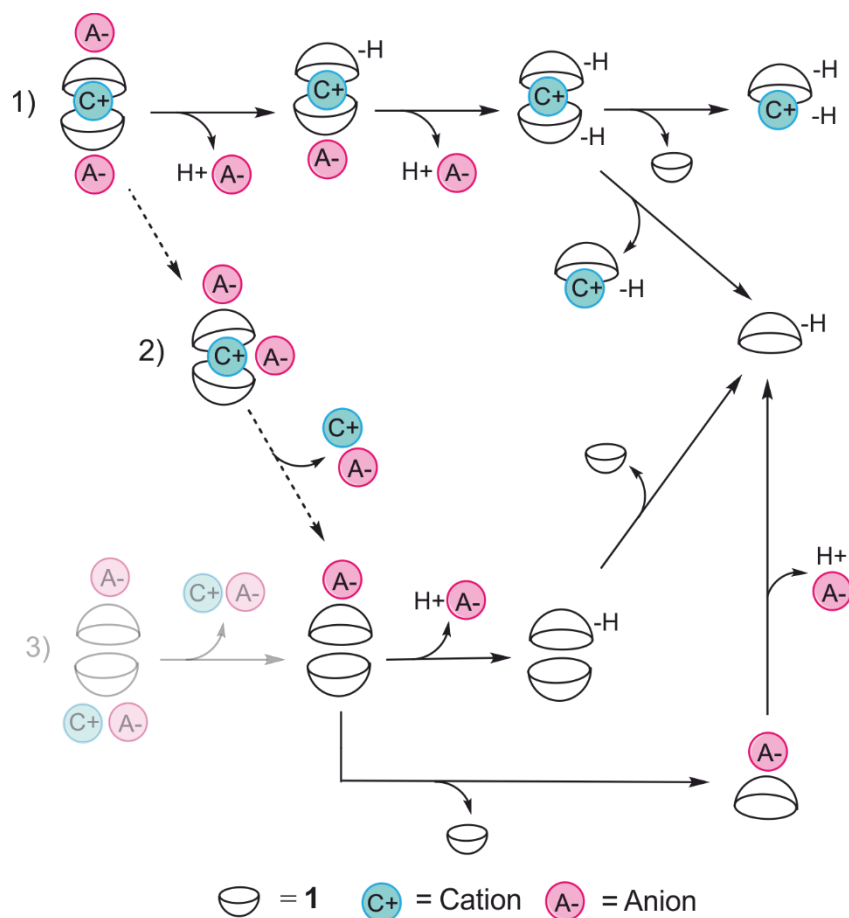

**Figure S4.** Schematic representation of the observed fragmentation pathways of mass-selected  $[1_2+\text{Me}_4\text{N}+2\text{A}]^-$  complexes in the IRMPD experiment. Pathway 1) was observed as the main route in line with the assignment of a cation-filled capsules carrying two external counterions.

## 2 NMR

$^1\text{H}$  NMR spectra were measured with a Bruker Avance III HD 300 NMR spectrometer. Samples were prepared with 10 mM concentration and 1:3 host-guest ratio in  $\text{CDCl}_3/\text{CD}_3\text{CN}$  (4:3, v:v) mixture and calibrated using  $\text{CD}_3\text{CN}$  signal at 1.95 ppm. Data was recorded at 298 K.

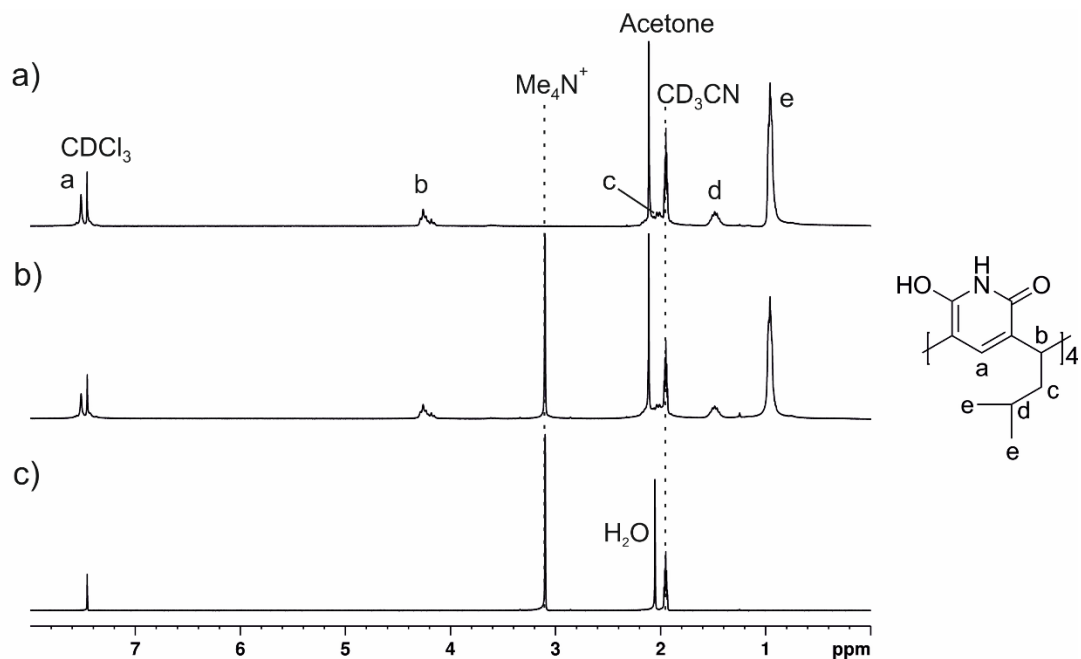

**Figure S5.**  $^1\text{H}$  NMR spectrum of a) **1** b) **1** +  $\text{Me}_4\text{NPF}_6$  (1:3 ratio) and c)  $\text{Me}_4\text{NPF}_6$  in  $\text{CDCl}_3/\text{CD}_3\text{CN}$  (4:3 v:v mixture) at 298 K. In b) no shift is observed in  $\text{Me}_4\text{N}$  signal, which indicates that **1** does not form a complex with  $\text{Me}_4\text{N}^+$  in solution.

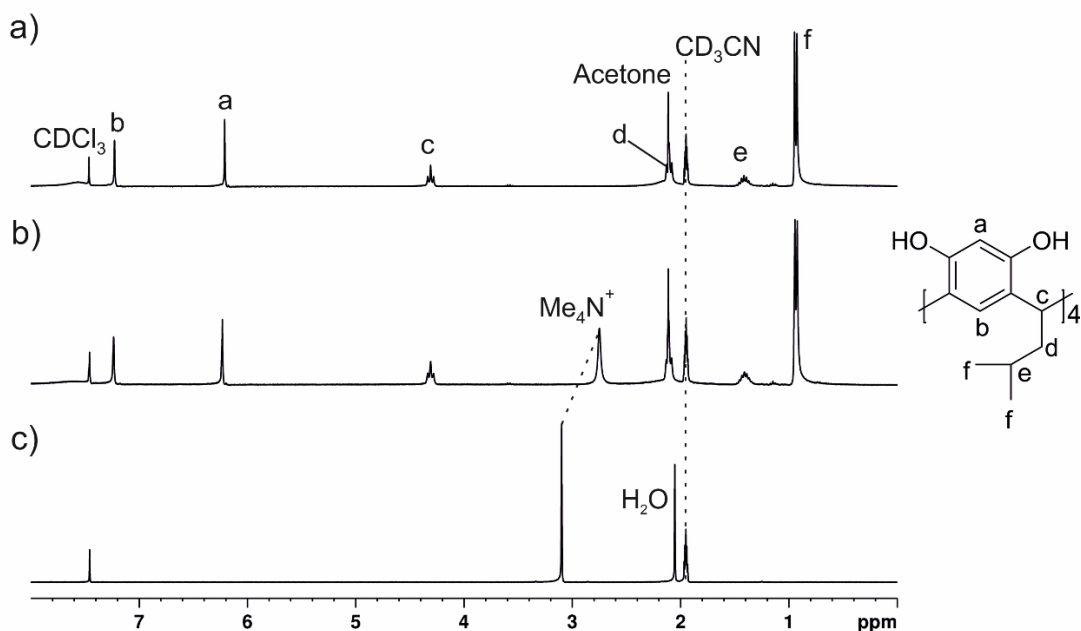

**Figure S6.**  $^1\text{H}$  NMR spectrum of a) **2** b) **2** +  $\text{Me}_4\text{NPF}_6$  (1:3 ratio) and c)  $\text{Me}_4\text{NPF}_6$  in  $\text{CDCl}_3/\text{CD}_3\text{CN}$  (4:3 v:v mixture) at 298 K. In b) the signal of  $\text{Me}_4\text{N}^+$  shifts by 0.35 ppm, showing that **2** forms complex with  $\text{Me}_4\text{N}^+$  in solution.

### 3 Computational details

The following computational procedure was employed to acquire the starting geometries for  $\mathbf{1}_2$ ,  $[\mathbf{1}_2+\text{Me}_4\text{N}_{\text{endo}}]^+$ ,  $[\mathbf{1}_2+\text{Me}_4\text{N}_{\text{exo1}}]^+$ ,  $[\mathbf{1}_2+\text{Me}_4\text{N}_{\text{exo2}}]^+$ ,  $[\mathbf{1}_2+\text{Me}_4\text{N}_{\text{endo+lexo}}]^+$ ,  $[\mathbf{1}_2+\text{Me}_4\text{N}_{\text{endo+2lexo}}]^+$ ,  $[\mathbf{1}_2+\text{lexo}]^-$ , and  $[\mathbf{1}_2+2\text{lexo}]^{2-}$  complexes. A systematic conformational sampling was first conducted for  $\mathbf{1}$  and its hydroxy tautomer  $\mathbf{1}_{\text{OH}}$  by using the Merck Molecular Force Field (MMFF) and rotating over all dihedral bonds [4]. PBE-D3/6-31+G\*\* single-point energy calculations were performed for all unique structures (535 and 1248 in case of  $\mathbf{1}$  and  $\mathbf{1}_{\text{OH}}$ , respectively) generated in the conformational sampling [5-9]. For  $\mathbf{1}$  ( $\mathbf{1}_{\text{OH}}$ ) single point energy calculations were followed by full geometry optimizations at the same level of theory for the 60 (53) lowest energy structures using the cut-off energy of 15 kJ/mol (20 kJ/mol). Of all the optimized structures, the 26 (29) lowest-energy structures were chosen employing the cut-off energy 10 kJ/mol (13 kJ/mol) for the final geometry optimizations that were carried out at the PBE0-D3/def2-TZVP level of theory [10-14]. The minimum structures of  $\mathbf{1}$  and  $\mathbf{1}_{\text{OH}}$  obtained from the above procedure are presented in Figure S10. As the hydroxy tautomer  $\mathbf{1}_{\text{OH}}$  is 150 kJ/mol higher in energy than  $\mathbf{1}$ , it can safely be assumed that the monomer exists mainly in the pyridone tautomer  $\mathbf{1}$  in the gas phase. Thus, no further computational analysis was carried out for  $\mathbf{1}_{\text{OH}}$  and its complexes. Assuming that  $\mathbf{1}_2$  maximizes intermolecular hydrogen bonds between two monomers in the gas phase and that the orientation of isobutyl groups is retained during the formation of  $\mathbf{1}_2$ , good starting geometries for dimers  $\mathbf{1}_2$ ,  $[\mathbf{1}_2+\text{Me}_4\text{N}_{\text{endo}}]^+$ ,  $[\mathbf{1}_2+\text{Me}_4\text{N}_{\text{exo1}}]^+$ ,  $[\mathbf{1}_2+\text{Me}_4\text{N}_{\text{exo2}}]^+$ ,  $[\mathbf{1}_2+\text{Me}_4\text{N}_{\text{endo+lexo}}]^+$ ,  $[\mathbf{1}_2+\text{Me}_4\text{N}_{\text{endo+2lexo}}]^+$ ,  $[\mathbf{1}_2+\text{lexo}]^-$ , and  $[\mathbf{1}_2+2\text{lexo}]^{2-}$  complexes can be constructed from the minimum structures of  $\mathbf{1}$ ,  $\text{Me}_4\text{N}^+$  and  $\text{I}^-$ . The geometries of these complexes were fully optimized at the PBE0-D3/def2-TZVP [10-14] and PBE0/def2-TZVP [10-12] levels of theory to investigate the influence of dispersion forces on the geometries and energies of the capsules under study. The starting geometries for  $\mathbf{2}$  and  $\mathbf{2}_2$  was adapted from previous studies [15], whereas the starting geometries of  $[\mathbf{2}_2+\text{Me}_4\text{N}_{\text{endo}}]^+$ ,  $[\mathbf{2}_2+\text{lexo}]^-$ , and  $[\mathbf{2}_2+2\text{lexo}]^{2-}$  were constructed in the similar manner than the starting geometries of complexes  $\mathbf{1}_2$ . The geometries of  $\mathbf{2}$  systems were only optimized at the PBE0-D3/def2-TZVP level of theory [10-14]. Due to the size of the investigated complexes, frequency analyses were only performed for the PBE0-D3/def2-SVP [10-12] optimized structures to ensure that the final structures correspond to local minima (no imaginary frequencies) on the potential energy hypersurface. For  $\mathbf{1}_{\text{OH}}$  the PBE0-D3/def2-SVP level showed one small imaginary frequency ( $\approx -5 \text{ cm}^{-1}$ ) due the dispersion correction that was confirmed as an artefact at the PBE0/def2-SVP level of theory that showed no imaginary frequencies for  $\mathbf{1}_{\text{OH}}$ .

All calculations were performed by Spartan' 16 [16] and Gaussian 09 (D01) [17] software packages.



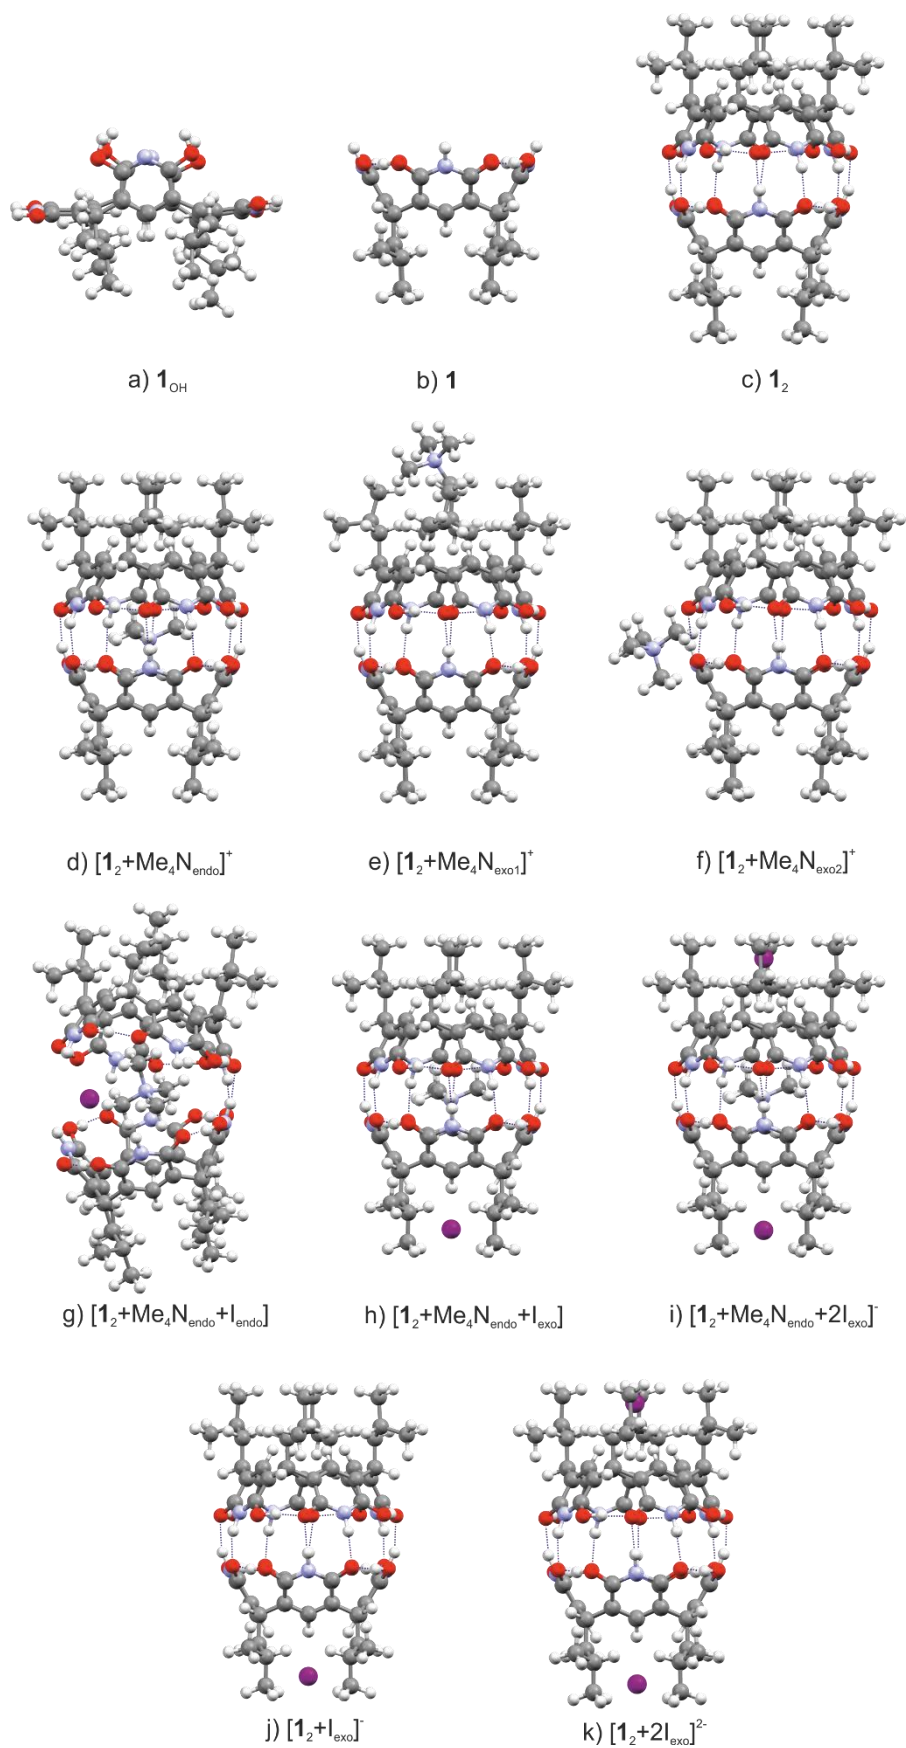

**Figure S7.** Optimized geometries for **1** at the PBE0-D3/def2-TZVP level of theory. Blue dotted lines represent H bonds. The PBE0/def2-TZVP optimized geometries are very similar.

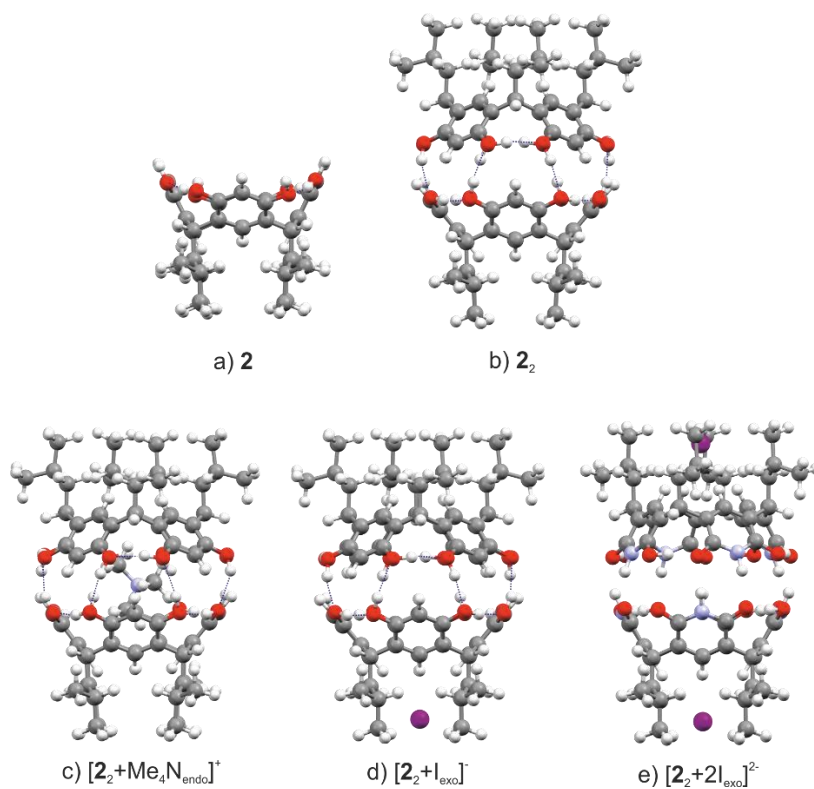

**Figure S8.** Optimized geometries for **2** at the PBE0-D3/def2-TZVP level of theory. Blue dotted lines represent H bonds. The PBE0/def2-TZVP optimized geometries are very similar.

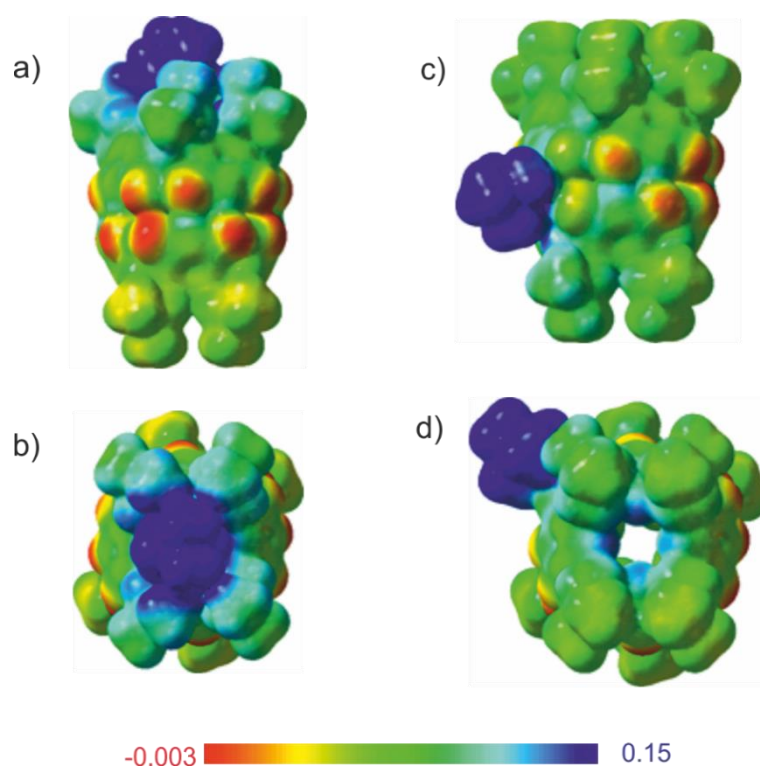

**Figure S9.** Calculated ESP surfaces (in au) superimposed on the total electron density (0.004 au) for a)  $[12+\text{Me}_4\text{N}_{\text{exo}1}]^+$  side view and b)  $[12+\text{Me}_4\text{N}_{\text{exo}1}]^+$  top view c)  $[12+\text{Me}_4\text{N}_{\text{exo}2}]^+$  side view and d)  $[12+\text{Me}_4\text{N}_{\text{exo}2}]^+$  top view. Red, blue and green surfaces indicate negative, positive and neutral ESP, respectively.

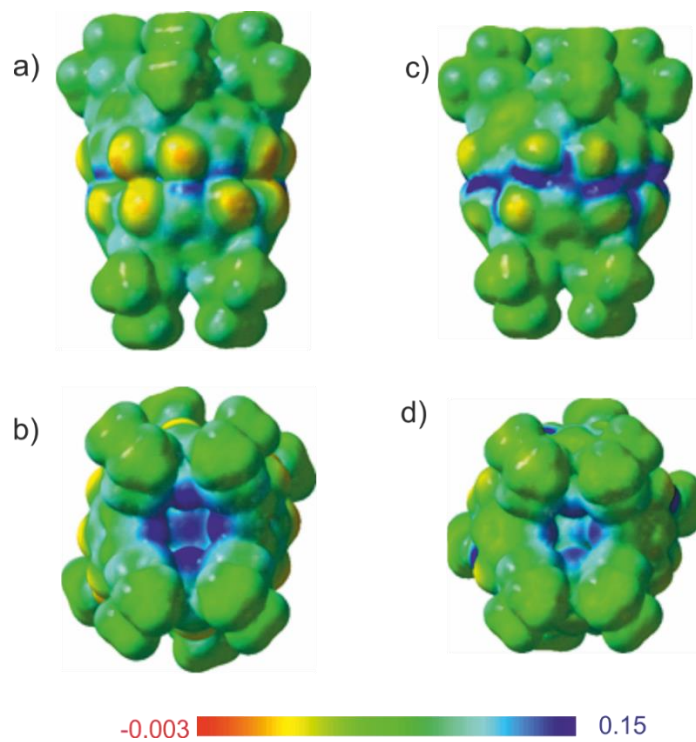

**Figure S10.** Calculated ESP surfaces (in au) superimposed on the total electron density (0.004 au) for a)  $[12+\text{Me}_4\text{N}_{\text{endo}}]^+$  side view b)  $[12+\text{Me}_4\text{N}_{\text{endo}}]^+$  bottom view c)  $[22+\text{Me}_4\text{N}_{\text{endo}}]^+$  side view and d)  $[22+\text{Me}_4\text{N}_{\text{endo}}]^+$  bottom view. Red, blue and green surfaces indicate negative, positive and neutral ESP, respectively.

**Table S2.** Optimized NH...O and OH...O bond lengths (Å) and calculated interaction energies (kJ/mol).

| Bond                                                                                        | NH...O    |                | OH...O    |                | E <sub>int</sub>     |                      |
|---------------------------------------------------------------------------------------------|-----------|----------------|-----------|----------------|----------------------|----------------------|
|                                                                                             | PBE0-D3   | PBE0           | PBE0-D3   | PBE0           | PBE0-D3              | PBE0                 |
| <b>1<sub>2</sub></b>                                                                        | 1.88-1.90 | 1.95-1.98      | 1.57-1.57 | 1.56-1.57      | -200.15 <sup>b</sup> | -125.82 <sup>b</sup> |
| [ <b>1<sub>2</sub></b> +Me <sub>4</sub> N <sub>endo</sub> ] <sup>+</sup>                    | 1.92-2.01 | 2.06-2.16      | 1.55-1.61 | 1.55-1.60      | -152.14 <sup>c</sup> | -25.70 <sup>c</sup>  |
| [ <b>1<sub>2</sub></b> +Me <sub>4</sub> N <sub>exo1</sub> ] <sup>+</sup>                    | 1.85-1.93 | - <sup>a</sup> | 1.56-1.58 | - <sup>a</sup> | -37.48 <sup>d</sup>  | - <sup>a</sup>       |
| [ <b>1<sub>2</sub></b> +Me <sub>4</sub> N <sub>exo2</sub> ] <sup>+</sup>                    | 1.85-1.92 | 1.93-1.99      | 1.46-1.64 | 1.46-1.63      | -98.02 <sup>e</sup>  | -74.83 <sup>e</sup>  |
| [ <b>1<sub>2</sub></b> +Me <sub>4</sub> N <sub>endo</sub> +I <sub>exo</sub> ]               | 1.90-2.01 | 2.05-2.15      | 1.56-1.60 | 1.56-1.59      | -342.05 <sup>f</sup> | -211.54 <sup>f</sup> |
| [ <b>1<sub>2</sub></b> +Me <sub>4</sub> N <sub>endo</sub> +2I <sub>exo</sub> ] <sup>-</sup> | 1.90-1.99 | 2.03-2.13      | 1.55-1.61 | 1.55-1.60      | -521.33 <sup>g</sup> | -387.64 <sup>g</sup> |
| [ <b>1<sub>2</sub></b> +Me <sub>4</sub> N <sub>endo</sub> +I <sub>endo</sub> ]              | 1.76-5.64 | 1.82-6.33      | 1.42-1.72 | 1.43-1.69      | -241.14 <sup>h</sup> | -192.43 <sup>h</sup> |
| [ <b>1<sub>2</sub></b> +I <sub>exo</sub> ] <sup>-</sup>                                     | 1.83-1.93 | 1.89-2.01      | 1.57-1.58 | 1.56-1.57      | -174.75 <sup>i</sup> | -                    |
| [ <b>1<sub>2</sub></b> +2I <sub>exo</sub> ] <sup>2-</sup>                                   | 1.88-2.00 | 1.95-1.98      | 1.57      | 1.56           | -223.14 <sup>j</sup> | -                    |
| <b>2<sub>2</sub></b>                                                                        | -         | -              | 1.86-2.08 | -              | -206.91 <sup>b</sup> | -                    |
| [ <b>2<sub>2</sub></b> +Me <sub>4</sub> N <sub>endo</sub> ] <sup>+</sup>                    | -         | -              | 1.83-2.26 | -              | -219.52 <sup>c</sup> | -                    |
| [ <b>2<sub>2</sub></b> +I <sub>exo</sub> ] <sup>-</sup>                                     | -         | -              | 1.83-2.18 | -              | -148.85 <sup>i</sup> | -                    |
| [ <b>2<sub>2</sub></b> +2I <sub>exo</sub> ] <sup>2-</sup>                                   | -         | -              | 1.84-2.07 | -              | -170.19 <sup>j</sup> | -                    |

a) Not a stable minimum on the potential energy hypersurface.

b) E<sub>int</sub> = E[X<sub>2</sub>] - (2 × E[X]), X = 1 or 2

c) E<sub>int</sub> = E[X<sub>2</sub>+Me<sub>4</sub>N<sub>endo</sub>]<sup>+</sup> - (E[X<sub>2</sub>] + E[Me<sub>4</sub>N]<sup>+</sup>)

d) E<sub>int</sub> = E[X<sub>2</sub>+Me<sub>4</sub>N<sub>exo1</sub>]<sup>+</sup> - (E[X<sub>2</sub>] + E[Me<sub>4</sub>N]<sup>+</sup>)

e) E<sub>int</sub> = E[X<sub>2</sub>+Me<sub>4</sub>N<sub>exo2</sub>]<sup>+</sup> - (E[X<sub>2</sub>] + E[Me<sub>4</sub>N]<sup>+</sup>)

f) E<sub>int</sub> = E[X<sub>2</sub>+Me<sub>4</sub>N<sub>endo</sub>+I<sub>exo</sub>] - (E[X<sub>2</sub>+I<sub>exo</sub>]<sup>-</sup> + E[Me<sub>4</sub>N]<sup>+</sup>)

g) E<sub>int</sub> = E[X<sub>2</sub>+Me<sub>4</sub>N<sub>endo</sub>+2I<sub>exo</sub>]<sup>-</sup> - (E[X<sub>2</sub>+2I<sub>exo</sub>]<sup>2-</sup> + E[Me<sub>4</sub>N]<sup>+</sup>)

h) E<sub>int</sub> = [X<sub>2</sub>+Me<sub>4</sub>N<sub>endo</sub>+I<sub>endo</sub>] - (E[X<sub>2</sub>+I<sub>exo</sub>]<sup>-</sup> + E[Me<sub>4</sub>N]<sup>+</sup>)

i) E<sub>int</sub> = [X<sub>2</sub>+I<sub>exo</sub>]<sup>-</sup> - (E[X<sub>2</sub>] + I<sup>-</sup>)

j) E<sub>int</sub> = [X<sub>2</sub>+2I<sub>exo</sub>]<sup>2-</sup> - (E[X<sub>2</sub>] + 2I<sup>-</sup>)

## References

1. Stow, S. M.; Causon, T. J.; Zheng, X.; Kurulugama, R. T.; Mairinger, T.; May, J. C.; Rennie, E. E.; Baker, E.S.; Smith, R. D.; McLean, J. A.; Hann S.; Fjeldsted, J. C. *Anal. Chem.* **2017**, *89*, 9048-9055.
2. Gabelica V. *et al. Mass Spectrom. Rev.* **2019**, *38*, 291-320.
3. Larriba C.; Hogan, C. J. *J. Comput. Phys.* **2013**, *251*, 344-36
4. Halgren, T. A. *J. Comput. Chem.* **1999**, *20*, 730-748.
5. Perdew, J. J.; Burke K.; Ernzerhof, M. *Phys. Rev. Lett.* **1996**, *77*, 3865-3868.
6. Perdew J. P.; Wang, Y. *Phys. Rev. B* **1992**, *45*, 13244-13249.
7. Clark, T.; Chandrasekhar, J.; Spitznagel G. W.; Schleyer, P. V. R. *J. Comput. Chem.* **1983**, *4*, 294-301.
8. Frisch, M. J.; Pople J. A.; Binkley, J. S. *J. Chem. Phys.* **1984**, *80*, 3265-3269.
9. Hehre, W. J.; Ditchfield R.; Pople, J. A. *J. Chem. Phys.* **1972**, *56*, 2257-2261.
10. Ernzerhof M.; Scuseria, G. E. *J. Chem. Phys.* **1999**, *110*, 5029-5036.
11. Adamo C.; Barone, V. *J. Chem. Phys.* **1999**, *110*, 6158-6170.
12. Weigend F.; Ahlrichs, R. *Phys. Chem. Chem. Phys.* **2005**, *7*, 3297-3305.
13. Grimme, S.; Ehrlich S.; Goerigk, L. *J. Comput. Chem.* **2011**, *32*, 1456-1465.
14. Grimme, S.; Antony, J.; Ehrlich S.; Krieg, H. *J. Chem. Phys.* **2010**, *132*, 154104.
15. Qi, Z.; Heinrich, T.; Moorthy, S.; Schalley, C. A. *Chem. Soc. Rev.* **2015**, *44*, 515-531.
16. Spartan 16; Wavefunction Inc.: Irvine CA, **2016**.
17. Gaussian 09, Revision D.01, M. J. Frisch, G. W. Trucks, H. B. Schlegel, G. E. Scuseria, M. A. Robb, J. R. Cheeseman, G. Scalmani, V. Barone, B. Mennucci, G. A. Petersson, H. Nakatsuji, M. Caricato, X. Li, H. P. Hratchian, A. F. Izmaylov, J. Bloino, G. Zheng, J. L. Sonnenberg, M. Hada, M. Ehara, K. Toyota, R. Fukuda, J. Hasegawa, M. Ishida, T. Nakajima, Y. Honda, O. Kitao, H. Nakai, T. Vreven, J. Montgomery, J. A., J. E. Peralta, F. Ogliaro, M. Bearpark, J. J. Heyd, E. Brothers, K. N. Kudin, V. N. Staroverov, R. Kobayashi, J. Normand, K. Raghavachari, A. Rendell, J. C. Burant, S. S. Iyengar, J. Tomasi, M. Cossi, N. Rega, J. M. Millam, M. Klene, J. E. Knox, J. B. Cross, V. Bakken, C. Adamo, J. Jaramillo, R. Gomperts, R. E. Stratmann, O. Yazyev, A. J. Austin, R. Cammi, C. Pomelli, J. W. Ochterski, R. L. Martin, K. Morokuma, V. G. Zakrzewski, G. A. Voth, P. Salvador, J. J. Dannenberg, S. Dapprich, A. D. Daniels, Ö. Farkas, J. B. Foresman, J. V. Ortiz, J. Cioslowski and D. J. Fox, Gaussian, Inc., Wallingford CT, **2016**.

## XYZ Coordinates

All systems calculated at the PBE0-D3/def2-TZVP level of theory

### TMA

Energy = -213.980103 hartree

Number of imaginary frequencies (PBE0-D3/def2-SVP) = 0

#### XYZ

|   |           |           |           |
|---|-----------|-----------|-----------|
| N | -0.471912 | 0.567059  | 0.000008  |
| C | 1.017374  | 0.567067  | -0.000006 |
| C | -0.968348 | 1.187193  | 1.259753  |
| C | -0.968351 | -0.833982 | -0.092801 |
| C | -0.968335 | 1.347941  | -1.166938 |
| H | -0.600767 | -1.396533 | 0.763518  |
| H | -0.600793 | -1.278645 | -1.015866 |
| H | -2.056822 | -0.823918 | -0.092123 |
| H | 1.370693  | -0.005635 | 0.855591  |
| H | 1.370688  | 1.594386  | 0.068141  |
| H | 1.370682  | 0.112450  | -0.923778 |
| H | -0.600748 | 2.369660  | -1.090525 |
| H | -2.056801 | 1.342382  | -1.158561 |
| H | -0.600770 | 0.887582  | -2.082268 |
| H | -0.600762 | 0.610137  | 2.106365  |
| H | -2.056814 | 1.182720  | 1.250706  |
| H | -0.600793 | 2.210076  | 1.318784  |

### 1

Energy = -2374.8697198 hartree

Number of imaginary frequencies (PBE0-D3/def2-SVP) = 0

#### XYZ

|   |           |           |           |
|---|-----------|-----------|-----------|
| N | 0.029319  | -3.981359 | -2.195615 |
| C | 1.231359  | -3.629899 | -1.671931 |
| C | 1.262682  | -2.961441 | -0.463485 |
| C | 0.022696  | -2.658469 | 0.113361  |
| C | -1.191080 | -2.979861 | -0.438720 |
| C | -1.203967 | -3.663894 | -1.684077 |

|   |           |           |           |
|---|-----------|-----------|-----------|
| C | -2.527177 | -2.572729 | 0.133639  |
| C | -2.548734 | -2.553796 | 1.659951  |
| C | -3.900901 | -2.214650 | 2.281390  |
| C | -3.772321 | -2.148619 | 3.795736  |
| C | 2.580658  | -2.519423 | 0.133194  |
| C | 2.577332  | -2.529423 | 1.659708  |
| C | 3.920453  | -2.202031 | 2.307307  |
| C | 3.766900  | -2.159619 | 3.820255  |
| O | 2.256786  | -3.982213 | -2.410583 |
| O | -2.219264 | -3.978868 | -2.345402 |
| C | -2.970260 | -1.262497 | -0.479797 |
| C | -3.682223 | -1.232461 | -1.661956 |
| N | -4.049203 | -0.030401 | -2.176334 |
| C | -3.719836 | 1.203368  | -1.671898 |
| C | -2.990343 | 1.189815  | -0.453486 |
| C | -2.640856 | -0.022894 | 0.080279  |
| O | -4.059153 | -2.263713 | -2.380212 |
| O | -4.059496 | 2.222045  | -2.315400 |
| C | -2.580651 | 2.519400  | 0.133689  |
| C | -2.577234 | 2.529196  | 1.660203  |
| C | -3.920318 | 2.201727  | 2.307840  |
| C | -3.766678 | 2.159127  | 3.820774  |
| C | -1.262710 | 2.961499  | -0.463010 |
| C | -1.231460 | 3.630118  | -1.671367 |
| N | -0.029451 | 3.981647  | -2.195078 |
| C | 1.203866  | 3.664115  | -1.683657 |
| C | 1.191053  | 2.979914  | -0.438390 |
| C | -0.022689 | 2.658448  | 0.113720  |
| O | -2.256932 | 3.982532  | -2.409909 |
| O | 2.219122  | 3.979179  | -2.344999 |
| C | 2.527185  | 2.572708  | 0.133833  |
| C | 2.548836  | 2.553572  | 1.660141  |
| C | 3.901044  | 2.214354  | 2.281452  |
| C | 3.772558  | 2.148127  | 3.795798  |
| C | 2.970233  | 1.262558  | -0.479805 |
| C | 3.682124  | 1.232680  | -1.662011 |
| N | 4.049072  | 0.030688  | -2.176574 |
| C | 3.719735  | -1.203147 | -1.672284 |

|   |           |           |           |
|---|-----------|-----------|-----------|
| C | 2.990315  | -1.189758 | -0.453826 |
| C | 2.640862  | 0.022879  | 0.080124  |
| O | 4.059011  | 2.264028  | -2.380153 |
| O | 4.059353  | -2.221739 | -2.315943 |
| C | -4.987375 | -3.196656 | 1.869236  |
| C | -5.012964 | 3.178766  | 1.899763  |
| C | 4.987487  | 3.196418  | 1.869357  |
| C | 5.013079  | -3.179015 | 1.899047  |
| H | -3.238792 | -3.337388 | -0.190686 |
| H | -3.330620 | 3.245661  | -0.192051 |
| H | 3.238779  | 3.337411  | -0.190435 |
| H | 3.330609  | -3.245639 | -0.192687 |
| H | 0.027008  | -2.127238 | 1.058376  |
| H | 2.073163  | 0.026884  | 1.005026  |
| H | -0.026944 | 2.127090  | 1.058664  |
| H | -2.073099 | -0.027023 | 1.005146  |
| H | -2.228857 | -3.541026 | 2.012616  |
| H | -1.806260 | -1.847737 | 2.047619  |
| H | -4.197549 | -1.220605 | 1.925785  |
| H | -4.710673 | -4.220084 | 2.142500  |
| H | -5.175082 | -3.175002 | 0.793792  |
| H | -5.929620 | -2.962580 | 2.370170  |
| H | -4.717582 | -1.858704 | 4.260453  |
| H | -3.013629 | -1.422340 | 4.100492  |
| H | -3.485006 | -3.122089 | 4.205456  |
| H | -1.831863 | 1.826579  | 2.048442  |
| H | -2.250813 | 3.521497  | 1.992624  |
| H | -4.222414 | 1.202643  | 1.972092  |
| H | -5.945944 | 2.953939  | 2.421865  |
| H | -5.221247 | 3.141209  | 0.828567  |
| H | -4.730070 | 4.205849  | 2.152463  |
| H | -3.472171 | 3.138677  | 4.210480  |
| H | -3.003489 | 1.437109  | 4.124419  |
| H | -4.704346 | 1.877383  | 4.305454  |
| H | 2.228975  | 3.540754  | 2.012957  |
| H | 1.806390  | 1.847458  | 2.047761  |
| H | 4.197674  | 1.220356  | 1.925701  |
| H | 4.710796  | 4.219809  | 2.142769  |



|   |           |           |           |
|---|-----------|-----------|-----------|
| H | 5.175125  | 3.174903  | 0.793898  |
| H | 5.929764  | 2.962282  | 2.370200  |
| H | 4.717850  | 1.858154  | 4.260419  |
| H | 3.013888  | 1.421806  | 4.100508  |
| H | 3.485267  | 3.121542  | 4.205662  |
| H | 1.831979  | -1.826864 | 2.048085  |
| H | 2.250938  | -3.521771 | 1.992015  |
| H | 4.222526  | -1.202903 | 1.971666  |
| H | 4.730204  | -4.206130 | 2.151637  |
| H | 5.946088  | -2.954248 | 2.421121  |
| H | 5.221299  | -3.141326 | 0.827843  |
| H | 3.003728  | -1.437640 | 4.124034  |
| H | 4.704596  | -1.877935 | 4.304916  |
| H | 3.472415  | -3.139218 | 4.209856  |
| H | 3.376283  | 3.030071  | -2.302625 |
| H | 3.046747  | -3.334646 | -2.302275 |
| H | -4.538668 | -0.037650 | -3.061167 |
| H | -0.036323 | 4.443114  | -3.094845 |
| H | 4.538483  | 0.038058  | -3.061436 |
| H | 0.036136  | -4.442703 | -3.095445 |
| H | -3.376421 | -3.029767 | -2.302827 |
| H | -3.046887 | 3.334950  | -2.301638 |

1<sub>OH</sub>

Energy = -2374.81247955 hartree

Number of imaginary frequencies (PBE0-D3/def2-SVP) = 1, no imaginary frequencies at the PBE0/def2-SVP level.

XYZ

scf done: -2374.812480

|   |           |           |           |
|---|-----------|-----------|-----------|
| N | 3.886775  | -3.425337 | -0.658682 |
| C | 4.136918  | -2.129092 | -0.625363 |
| C | 3.170321  | -1.155338 | -0.382673 |
| C | 1.893223  | -1.633707 | -0.145356 |
| C | 1.587727  | -2.987018 | -0.151139 |
| C | 2.650056  | -3.838947 | -0.432478 |
| C | 0.190733  | -3.495709 | 0.122392  |
| C | -0.096026 | -3.533221 | 1.625838  |
| C | 0.768460  | -4.496747 | 2.432098  |

|   |           |           |           |
|---|-----------|-----------|-----------|
| C | 0.436731  | -5.949822 | 2.124587  |
| C | 3.535380  | 0.309610  | -0.375864 |
| C | 4.032163  | 0.726917  | 1.011022  |
| C | 4.624707  | 2.130338  | 1.104704  |
| C | 4.969907  | 2.451216  | 2.551169  |
| O | 5.410379  | -1.749552 | -0.847207 |
| C | -0.832621 | -2.687739 | -0.638307 |
| C | -0.868974 | -2.728336 | -2.033279 |
| N | -1.730913 | -2.051717 | -2.770507 |
| C | -2.631479 | -1.295768 | -2.162385 |
| C | -2.734271 | -1.168489 | -0.780584 |
| C | -1.792685 | -1.880797 | -0.048922 |
| O | 0.012078  | -3.506161 | -2.683698 |
| C | -3.814007 | -0.324471 | -0.158006 |
| C | -4.260037 | -0.832343 | 1.218728  |
| C | -4.811350 | -2.255081 | 1.253084  |
| C | -5.137765 | -2.645537 | 2.687074  |
| C | -3.438867 | 1.136584  | -0.071335 |
| C | -4.432392 | 2.111405  | -0.008610 |
| N | -4.194023 | 3.406515  | 0.098307  |
| C | -2.937612 | 3.813518  | 0.148200  |
| C | -1.839856 | 2.960729  | 0.080892  |
| C | -2.136401 | 1.610642  | -0.029763 |
| O | -5.726082 | 1.736016  | -0.063163 |
| C | -0.437476 | 3.518896  | 0.140359  |
| C | -0.019260 | 3.741119  | 1.595892  |
| C | 1.249716  | 4.563888  | 1.806144  |
| C | 1.632672  | 4.555617  | 3.278477  |
| C | 0.535531  | 2.694812  | -0.662511 |
| C | 0.486045  | 2.727392  | -2.056206 |
| N | 1.301062  | 2.047538  | -2.843328 |
| C | 2.236202  | 1.296311  | -2.287072 |
| C | 2.421780  | 1.171135  | -0.911912 |
| C | 1.526885  | 1.885514  | -0.126529 |
| O | -0.437025 | 3.498226  | -2.655673 |
| C | 0.605520  | -4.215446 | 3.918792  |
| C | -6.030978 | -2.415117 | 0.357186  |
| C | 1.092294  | 5.990463  | 1.299978  |

|   |           |           |           |
|---|-----------|-----------|-----------|
| C | 5.843996  | 2.295555  | 0.209247  |
| H | 0.142335  | -4.517055 | -0.265017 |
| H | -4.680264 | -0.374846 | -0.822645 |
| H | -0.489826 | 4.499607  | -0.340769 |
| H | 4.373331  | 0.411357  | -1.069176 |
| H | 1.091965  | -0.920612 | 0.023175  |
| H | 1.620360  | 1.822872  | 0.950681  |
| H | -1.319161 | 0.901577  | -0.112177 |
| H | -1.824384 | -1.814009 | 1.030875  |
| H | 0.035098  | -2.522213 | 2.029774  |
| H | -1.148364 | -3.800453 | 1.784617  |
| H | 1.817379  | -4.318803 | 2.166896  |
| H | -0.436023 | -4.353529 | 4.227553  |
| H | 0.892851  | -3.189704 | 4.164325  |
| H | 1.220058  | -4.890575 | 4.519478  |
| H | -0.606591 | -6.165881 | 2.377779  |
| H | 1.066051  | -6.623799 | 2.711335  |
| H | 0.591828  | -6.189476 | 1.072065  |
| H | -3.426377 | -0.744071 | 1.924766  |
| H | -5.033378 | -0.150330 | 1.586882  |
| H | -4.035309 | -2.937179 | 0.886362  |
| H | -6.814688 | -1.705038 | 0.639748  |
| H | -5.791486 | -2.245986 | -0.694604 |
| H | -6.444919 | -3.423004 | 0.442305  |
| H | -4.259168 | -2.561374 | 3.332703  |
| H | -5.500492 | -3.674858 | 2.745206  |
| H | -5.915822 | -1.994851 | 3.098911  |
| H | -0.846628 | 4.249024  | 2.102980  |
| H | 0.079574  | 2.769709  | 2.094624  |
| H | 2.066174  | 4.098695  | 1.242387  |
| H | 0.258508  | 6.489005  | 1.804043  |
| H | 0.900513  | 6.027517  | 0.225932  |
| H | 1.997398  | 6.571805  | 1.492899  |
| H | 1.774768  | 3.536544  | 3.648295  |
| H | 2.560099  | 5.107148  | 3.451190  |
| H | 0.849097  | 5.021746  | 3.884370  |
| H | 3.217333  | 0.620499  | 1.736757  |
| H | 4.796198  | 0.004004  | 1.318005  |

|   |           |           |           |
|---|-----------|-----------|-----------|
| H | 3.866624  | 2.848295  | 0.770975  |
| H | 6.611807  | 1.557122  | 0.460964  |
| H | 6.281903  | 3.289341  | 0.331491  |
| H | 5.597592  | 2.172866  | -0.847218 |
| H | 4.094769  | 2.361519  | 3.199920  |
| H | 5.356901  | 3.468478  | 2.650232  |
| H | 5.735557  | 1.765465  | 2.927828  |
| H | -0.310944 | 3.388426  | -3.605763 |
| H | 5.907226  | -2.557786 | -1.021667 |
| H | -0.171634 | -3.400961 | -3.624934 |
| H | -6.244672 | 2.548755  | -0.030815 |
| O | -3.493572 | -0.628420 | -2.950372 |
| H | -3.268293 | -0.861721 | -3.858845 |
| O | 2.442970  | -5.168995 | -0.489448 |
| H | 3.292971  | -5.564641 | -0.715752 |
| O | 3.052207  | 0.627035  | -3.120446 |
| H | 2.772854  | 0.853718  | -4.015530 |
| O | -2.733829 | 5.140779  | 0.266760  |
| H | -3.607472 | 5.549613  | 0.266628  |

**1<sub>2</sub>**

Energy = -4749.8156745 hartree

Number of imaginary frequencies (PBE0-D3/def2-SVP) = 0

XYZ

|   |           |          |           |
|---|-----------|----------|-----------|
| N | -0.943037 | 1.506230 | -3.895703 |
| C | -2.027075 | 2.064150 | -3.309232 |
| C | -1.895448 | 3.246626 | -2.608095 |
| C | -0.614796 | 3.804316 | -2.573555 |
| C | 0.489582  | 3.243738 | -3.170159 |
| C | 0.331045  | 1.997681 | -3.831948 |
| C | 1.881609  | 3.825137 | -3.072129 |
| C | 1.896606  | 5.351857 | -3.064710 |
| C | 3.287942  | 5.979222 | -3.044965 |
| C | 3.171174  | 7.493610 | -2.960795 |
| C | -3.084937 | 3.822308 | -1.874335 |
| C | -3.098339 | 5.349308 | -1.868515 |
| C | -4.329254 | 5.981269 | -1.223876 |

|   |           |          |           |
|---|-----------|----------|-----------|
| C | -4.186245 | 7.495749 | -1.212912 |
| O | -3.138628 | 1.387697 | -3.483217 |
| O | 1.261932  | 1.308778 | -4.335859 |
| C | 2.610671  | 3.223615 | -1.892125 |
| C | 3.346100  | 2.064809 | -2.035746 |
| N | 3.943028  | 1.509685 | -0.954792 |
| C | 3.874129  | 1.994010 | 0.322639  |
| C | 3.179550  | 3.220085 | 0.490171  |
| C | 2.557198  | 3.764511 | -0.606186 |
| O | 3.541429  | 1.412876 | -3.158932 |
| O | 4.400349  | 1.317070 | 1.249787  |
| C | 3.084938  | 3.822308 | 1.874334  |
| C | 3.098339  | 5.349309 | 1.868514  |
| C | 4.329256  | 5.981270 | 1.223878  |
| C | 4.186247  | 7.495751 | 1.212919  |
| C | 1.895448  | 3.246627 | 2.608094  |
| C | 2.027074  | 2.064151 | 3.309231  |
| N | 0.943036  | 1.506231 | 3.895702  |
| C | -0.331045 | 1.997684 | 3.831948  |
| C | -0.489581 | 3.243740 | 3.170159  |
| C | 0.614797  | 3.804318 | 2.573556  |
| O | 3.138626  | 1.387697 | 3.483217  |
| O | -1.261935 | 1.308782 | 4.335859  |
| C | -1.881608 | 3.825140 | 3.072128  |
| C | -1.896605 | 5.351859 | 3.064709  |
| C | -3.287941 | 5.979225 | 3.044965  |
| C | -3.171173 | 7.493613 | 2.960796  |
| C | -2.610668 | 3.223617 | 1.892124  |
| C | -3.346095 | 2.064809 | 2.035745  |
| N | -3.943025 | 1.509685 | 0.954791  |
| C | -3.874128 | 1.994011 | -0.322639 |
| C | -3.179549 | 3.220086 | -0.490172 |
| C | -2.557196 | 3.764513 | 0.606184  |
| O | -3.541419 | 1.412873 | 3.158930  |
| O | -4.400348 | 1.317071 | -1.249787 |
| C | 4.126670  | 5.562983 | -4.244177 |
| C | 5.620516  | 5.561380 | 1.910364  |
| C | -4.126668 | 5.562985 | 4.244177  |

|   |           |          |           |
|---|-----------|----------|-----------|
| C | -5.620516 | 5.561383 | -1.910362 |
| H | 2.408649  | 3.502856 | -3.974338 |
| H | 3.975411  | 3.496027 | 2.418537  |
| H | -2.408649 | 3.502860 | 3.974336  |
| H | -3.975411 | 3.496026 | -2.418537 |
| H | -0.486147 | 4.739409 | -2.040175 |
| H | -1.996951 | 4.683774 | 0.468950  |
| H | 0.486149  | 4.739411 | 2.040176  |
| H | 1.996952  | 4.683772 | -0.468951 |
| H | 1.357027  | 5.699721 | -3.953046 |
| H | 1.335324  | 5.738889 | -2.207300 |
| H | 3.802572  | 5.631199 | -2.141293 |
| H | 3.623227  | 5.824725 | -5.180536 |
| H | 4.323186  | 4.488972 | -4.256403 |
| H | 5.093550  | 6.071512 | -4.233897 |
| H | 4.155488  | 7.962704 | -2.892937 |
| H | 2.593295  | 7.801295 | -2.084798 |
| H | 2.671335  | 7.895939 | -3.847562 |
| H | 2.208326  | 5.740573 | 1.363708  |
| H | 3.022637  | 5.690210 | 2.907588  |
| H | 4.378304  | 5.640735 | 0.182920  |
| H | 6.477660  | 6.072116 | 1.465375  |
| H | 5.801456  | 4.487732 | 1.827344  |
| H | 5.596386  | 5.817739 | 2.974527  |
| H | 4.141320  | 7.890644 | 2.232794  |
| H | 3.274520  | 7.806757 | 0.695234  |
| H | 5.033194  | 7.968980 | 0.710652  |
| H | -1.357025 | 5.699723 | 3.953043  |
| H | -1.335324 | 5.738891 | 2.207298  |
| H | -3.802572 | 5.631203 | 2.141293  |
| H | -3.623222 | 5.824724 | 5.180536  |
| H | -4.323186 | 4.488974 | 4.256402  |
| H | -5.093546 | 6.071516 | 4.233900  |
| H | -4.155486 | 7.962707 | 2.892936  |
| H | -2.593291 | 7.801299 | 2.084800  |
| H | -2.671335 | 7.895941 | 3.847565  |
| H | -2.208325 | 5.740573 | -1.363712 |
| H | -3.022639 | 5.690211 | -2.907590 |

|   |           |           |           |
|---|-----------|-----------|-----------|
| H | -4.378302 | 5.640729  | -0.182920 |
| H | -5.596388 | 5.817747  | -2.974524 |
| H | -6.477659 | 6.072116  | -1.465369 |
| H | -5.801456 | 4.487733  | -1.827348 |
| H | -3.274519 | 7.806754  | -0.695223 |
| H | -5.033193 | 7.968977  | -0.710647 |
| H | -4.141315 | 7.890646  | -2.232786 |
| H | -2.702207 | 1.434225  | 3.724609  |
| H | -3.726853 | 1.433117  | -2.660700 |
| H | 4.354168  | 0.575936  | -1.086652 |
| H | 1.071897  | 0.563081  | 4.288275  |
| H | -4.354167 | 0.575938  | 1.086653  |
| H | -1.071895 | 0.563079  | -4.288274 |
| H | 2.702220  | 1.434228  | -3.724615 |
| H | 3.726850  | 1.433114  | 2.660699  |
| N | 0.943037  | -1.506230 | -3.895703 |
| C | 2.027075  | -2.064150 | -3.309232 |
| C | 1.895448  | -3.246626 | -2.608095 |
| C | 0.614796  | -3.804316 | -2.573555 |
| C | -0.489582 | -3.243738 | -3.170159 |
| C | -0.331045 | -1.997681 | -3.831948 |
| C | -1.881609 | -3.825137 | -3.072129 |
| C | -1.896606 | -5.351857 | -3.064710 |
| C | -3.287942 | -5.979222 | -3.044965 |
| C | -3.171174 | -7.493610 | -2.960795 |
| C | 3.084937  | -3.822308 | -1.874335 |
| C | 3.098339  | -5.349308 | -1.868515 |
| C | 4.329254  | -5.981269 | -1.223876 |
| C | 4.186245  | -7.495749 | -1.212912 |
| O | 3.138628  | -1.387697 | -3.483217 |
| O | -1.261932 | -1.308778 | -4.335859 |
| C | -2.610671 | -3.223615 | -1.892125 |
| C | -3.346100 | -2.064809 | -2.035746 |
| N | -3.943028 | -1.509685 | -0.954792 |
| C | -3.874129 | -1.994010 | 0.322639  |
| C | -3.179550 | -3.220085 | 0.490171  |
| C | -2.557198 | -3.764511 | -0.606186 |
| O | -3.541429 | -1.412876 | -3.158932 |

|   |           |           |           |
|---|-----------|-----------|-----------|
| O | -4.400349 | -1.317070 | 1.249787  |
| C | -3.084938 | -3.822308 | 1.874334  |
| C | -3.098339 | -5.349309 | 1.868514  |
| C | -4.329256 | -5.981270 | 1.223878  |
| C | -4.186247 | -7.495751 | 1.212919  |
| C | -1.895448 | -3.246627 | 2.608094  |
| C | -2.027074 | -2.064151 | 3.309231  |
| N | -0.943036 | -1.506231 | 3.895702  |
| C | 0.331045  | -1.997684 | 3.831948  |
| C | 0.489581  | -3.243740 | 3.170159  |
| C | -0.614797 | -3.804318 | 2.573556  |
| O | -3.138626 | -1.387697 | 3.483217  |
| O | 1.261935  | -1.308782 | 4.335859  |
| C | 1.881608  | -3.825140 | 3.072128  |
| C | 1.896605  | -5.351859 | 3.064709  |
| C | 3.287941  | -5.979225 | 3.044965  |
| C | 3.171173  | -7.493613 | 2.960796  |
| C | 2.610668  | -3.223617 | 1.892124  |
| C | 3.346095  | -2.064809 | 2.035745  |
| N | 3.943025  | -1.509685 | 0.954791  |
| C | 3.874128  | -1.994011 | -0.322639 |
| C | 3.179549  | -3.220086 | -0.490172 |
| C | 2.557196  | -3.764513 | 0.606184  |
| O | 3.541419  | -1.412873 | 3.158930  |
| O | 4.400348  | -1.317071 | -1.249787 |
| C | -4.126670 | -5.562983 | -4.244177 |
| C | -5.620516 | -5.561380 | 1.910364  |
| C | 4.126668  | -5.562985 | 4.244177  |
| C | 5.620516  | -5.561383 | -1.910362 |
| H | -2.408649 | -3.502856 | -3.974338 |
| H | -3.975411 | -3.496027 | 2.418537  |
| H | 2.408649  | -3.502860 | 3.974336  |
| H | 3.975411  | -3.496026 | -2.418537 |
| H | 0.486147  | -4.739409 | -2.040175 |
| H | 1.996951  | -4.683774 | 0.468950  |
| H | -0.486149 | -4.739411 | 2.040176  |
| H | -1.996952 | -4.683772 | -0.468951 |
| H | -1.357027 | -5.699721 | -3.953046 |



|   |           |           |           |
|---|-----------|-----------|-----------|
| H | -1.335324 | -5.738889 | -2.207300 |
| H | -3.802572 | -5.631199 | -2.141293 |
| H | -3.623227 | -5.824725 | -5.180536 |
| H | -4.323186 | -4.488972 | -4.256403 |
| H | -5.093550 | -6.071512 | -4.233897 |
| H | -4.155488 | -7.962704 | -2.892937 |
| H | -2.593295 | -7.801295 | -2.084798 |
| H | -2.671335 | -7.895939 | -3.847562 |
| H | -2.208326 | -5.740573 | 1.363708  |
| H | -3.022637 | -5.690210 | 2.907588  |
| H | -4.378304 | -5.640735 | 0.182920  |
| H | -6.477660 | -6.072116 | 1.465375  |
| H | -5.801456 | -4.487732 | 1.827344  |
| H | -5.596386 | -5.817739 | 2.974527  |
| H | -4.141320 | -7.890644 | 2.232794  |
| H | -3.274520 | -7.806757 | 0.695234  |
| H | -5.033194 | -7.968980 | 0.710652  |
| H | 1.357025  | -5.699723 | 3.953043  |
| H | 1.335324  | -5.738891 | 2.207298  |
| H | 3.802572  | -5.631203 | 2.141293  |
| H | 3.623222  | -5.824724 | 5.180536  |
| H | 4.323186  | -4.488974 | 4.256402  |
| H | 5.093546  | -6.071516 | 4.233900  |
| H | 4.155486  | -7.962707 | 2.892936  |
| H | 2.593291  | -7.801299 | 2.084800  |
| H | 2.671335  | -7.895941 | 3.847565  |
| H | 2.208325  | -5.740573 | -1.363712 |
| H | 3.022639  | -5.690211 | -2.907590 |
| H | 4.378302  | -5.640729 | -0.182920 |
| H | 5.596388  | -5.817747 | -2.974524 |
| H | 6.477659  | -6.072116 | -1.465369 |
| H | 5.801456  | -4.487733 | -1.827348 |
| H | 3.274519  | -7.806754 | -0.695223 |
| H | 5.033193  | -7.968977 | -0.710647 |
| H | 4.141315  | -7.890646 | -2.232786 |
| H | 2.702207  | -1.434225 | 3.724609  |
| H | 3.726853  | -1.433117 | -2.660700 |
| H | -4.354168 | -0.575936 | -1.086652 |

|   |           |           |           |
|---|-----------|-----------|-----------|
| H | -1.071897 | -0.563081 | 4.288275  |
| H | 4.354167  | -0.575938 | 1.086653  |
| H | 1.071895  | -0.563079 | -4.288274 |
| H | -2.702220 | -1.434228 | -3.724615 |
| H | -3.726850 | -1.433114 | 2.660699  |

[1<sub>2</sub>+Me<sub>4</sub>N<sub>endo</sub>]<sup>+</sup>

Energy = -4963.853726 hartree

Number of imaginary frequencies (PBE0-D3/def2-SVP) = 0

XYZ

|   |            |             |             |
|---|------------|-------------|-------------|
| N | 1.55696900 | -0.94304600 | 3.91879000  |
| C | 2.12013500 | -2.02760000 | 3.33223700  |
| C | 3.29691600 | -1.88723400 | 2.62071400  |
| C | 3.85028900 | -0.60123000 | 2.59385100  |
| C | 3.27615700 | 0.50602500  | 3.17400100  |
| C | 2.02611400 | 0.33995800  | 3.83053900  |
| C | 3.84744500 | 1.90502300  | 3.07178000  |
| C | 5.37410200 | 1.92953200  | 3.05819600  |
| C | 5.99316100 | 3.32506900  | 3.04363900  |
| C | 7.50782600 | 3.21396100  | 2.95664400  |
| C | 3.88648800 | -3.07284300 | 1.88442800  |
| C | 5.41371000 | -3.06483000 | 1.87420300  |
| C | 6.06145600 | -4.29496200 | 1.24279000  |
| C | 7.57343300 | -4.12747700 | 1.22861100  |
| O | 1.44173300 | -3.13610900 | 3.50613300  |
| O | 1.30673400 | 1.26538000  | 4.29328400  |
| C | 3.23784400 | 2.63486900  | 1.89266200  |
| C | 2.07376200 | 3.36531000  | 2.03581900  |
| N | 1.51915700 | 3.96038400  | 0.95026900  |
| C | 2.00019100 | 3.88725600  | -0.33065500 |
| C | 3.23243200 | 3.19969100  | -0.49742300 |
| C | 3.78703900 | 2.59791500  | 0.60618300  |
| O | 1.40587800 | 3.54895700  | 3.14845000  |
| O | 1.30510600 | 4.38871200  | -1.25407200 |
| C | 3.83455700 | 3.09999300  | -1.88445000 |
| C | 5.36147700 | 3.11624800  | -1.87822800 |
| C | 5.99064900 | 4.35710800  | -1.24906900 |

|   |            |             |             |
|---|------------|-------------|-------------|
| C | 7.50521900 | 4.21481700  | -1.23948100 |
| C | 3.26062500 | 1.90482400  | -2.61664500 |
| C | 2.06384200 | 2.02320700  | -3.29905600 |
| N | 1.50733200 | 0.92769400  | -3.87168300 |
| C | 2.01030900 | -0.34474400 | -3.81059700 |
| C | 3.27177200 | -0.48968600 | -3.17201100 |
| C | 3.83883700 | 0.62985200  | -2.60478700 |
| O | 1.35585000 | 3.11453800  | -3.45187800 |
| O | 1.30539500 | -1.28021700 | -4.27600000 |
| C | 3.86551000 | -1.87978800 | -3.07471300 |
| C | 5.39243600 | -1.88035400 | -3.06794900 |
| C | 6.03342100 | -3.26600200 | -3.05944900 |
| C | 7.54656300 | -3.13108500 | -2.97983800 |
| C | 3.27339200 | -2.62257400 | -1.89403100 |
| C | 2.12625000 | -3.37900200 | -2.03310900 |
| N | 1.58867300 | -3.98782500 | -0.94677200 |
| C | 2.06026000 | -3.88757000 | 0.33639200  |
| C | 3.28466800 | -3.18443800 | 0.49780500  |
| C | 3.82567500 | -2.57509100 | -0.60976900 |
| O | 1.45154500 | -3.57213200 | -3.14120400 |
| O | 1.36390300 | -4.37693900 | 1.26496900  |
| C | 5.57492300 | 4.15472300  | 4.24852000  |
| C | 5.56789300 | 5.63823300  | -1.95267200 |
| C | 5.62217400 | -4.09974800 | -4.26390200 |
| C | 5.66237100 | -5.58300100 | 1.94757800  |
| H | 3.52626900 | 2.43062200  | 3.97520700  |
| H | 3.50742300 | 3.98872600  | -2.43111800 |
| H | 3.54887200 | -2.40847700 | -3.97797000 |
| H | 3.57526400 | -3.96706000 | 2.43127800  |
| H | 4.79057400 | -0.47034100 | 2.07016600  |
| H | 4.74530200 | -2.01364700 | -0.48028200 |
| H | 4.79063400 | 0.51542500  | -2.09848300 |
| H | 4.71642800 | 2.05357200  | 0.47390300  |
| H | 5.72692200 | 1.38911600  | 3.94353600  |
| H | 5.76212200 | 1.37279900  | 2.19788500  |
| H | 5.64309600 | 3.84369100  | 2.14246900  |
| H | 5.84191000 | 3.64856600  | 5.18150600  |
| H | 4.50038600 | 4.35000200  | 4.26626800  |

|   |            |             |             |
|---|------------|-------------|-------------|
| H | 6.07945700 | 5.12304500  | 4.24222500  |
| H | 7.97167100 | 4.20034600  | 2.89242700  |
| H | 7.81795600 | 2.64144200  | 2.07800200  |
| H | 7.91378100 | 2.71364300  | 3.84094500  |
| H | 5.75523100 | 2.23261700  | -1.36359500 |
| H | 5.70177900 | 3.03003500  | -2.91628100 |
| H | 5.65320100 | 4.41947200  | -0.20738600 |
| H | 6.07922400 | 6.50066900  | -1.52025900 |
| H | 4.49462800 | 5.82394600  | -1.87041800 |
| H | 5.82350900 | 5.60109100  | -3.01627700 |
| H | 7.89867200 | 4.15981500  | -2.25896000 |
| H | 7.81944900 | 3.31007400  | -0.71160500 |
| H | 7.97734900 | 5.06805800  | -0.74827300 |
| H | 5.73322600 | -1.33239900 | -3.95342400 |
| H | 5.77539800 | -1.32009300 | -2.20765200 |
| H | 5.69612800 | -3.79174700 | -2.15754800 |
| H | 5.87545600 | -3.58721400 | -5.19723300 |
| H | 4.55095800 | -4.31292100 | -4.27604400 |
| H | 6.14272100 | -5.05956700 | -4.26264600 |
| H | 8.02620400 | -4.11015000 | -2.92002500 |
| H | 7.85202000 | -2.55559700 | -2.10150100 |
| H | 7.94014900 | -2.62263500 | -3.86509800 |
| H | 5.79177500 | -2.17451800 | 1.35934900  |
| H | 5.75488400 | -2.97352800 | 2.91148300  |
| H | 5.72207000 | -4.36301000 | 0.20205900  |
| H | 5.92116100 | -5.54179800 | 3.01025300  |
| H | 6.18613400 | -6.43692000 | 1.51313600  |
| H | 4.59198600 | -5.78625500 | 1.86930200  |
| H | 7.87092100 | -3.21776500 | 0.69955700  |
| H | 8.05830100 | -4.97291700 | 0.73630400  |
| H | 7.96891100 | -4.06547500 | 2.24689600  |
| H | 1.47707800 | -2.74035100 | -3.71492200 |
| H | 1.50494500 | -3.73559600 | 2.69453400  |
| H | 0.59764800 | 4.39357200  | 1.08278300  |
| H | 0.56999500 | 1.05090400  | -4.27823500 |
| H | 0.67093500 | -4.42770200 | -1.07883600 |
| H | 0.63160700 | -1.07637600 | 4.34243400  |
| H | 1.44807500 | 2.71658000  | 3.72294000  |

|   |             |             |             |
|---|-------------|-------------|-------------|
| H | 1.43266200  | 3.72786500  | -2.64569400 |
| N | -1.59407200 | 0.98059100  | 3.98547100  |
| C | -2.12978300 | 2.05203300  | 3.35098700  |
| C | -3.28786800 | 1.90148100  | 2.61303100  |
| C | -3.84130900 | 0.61634600  | 2.58937000  |
| C | -3.28914700 | -0.48044100 | 3.20902400  |
| C | -2.05974500 | -0.30568900 | 3.90137000  |
| C | -3.85537000 | -1.87926400 | 3.09464000  |
| C | -5.38227000 | -1.90681600 | 3.07967400  |
| C | -5.99855300 | -3.30342200 | 3.05691800  |
| C | -7.51335600 | -3.19494100 | 2.96913200  |
| C | -3.87197200 | 3.07937700  | 1.86409200  |
| C | -5.40004900 | 3.07710700  | 1.86111200  |
| C | -6.04631400 | 4.30362900  | 1.22134500  |
| C | -7.55901800 | 4.14221500  | 1.21734500  |
| O | -1.44517200 | 3.16068000  | 3.50668000  |
| O | -1.34794800 | -1.22685000 | 4.38299300  |
| C | -3.24121700 | -2.59649100 | 1.91077000  |
| C | -2.07326200 | -3.31800400 | 2.05234600  |
| N | -1.51377000 | -3.91113200 | 0.96846300  |
| C | -2.00057200 | -3.84965200 | -0.31135700 |
| C | -3.23922800 | -3.17390200 | -0.47567500 |
| C | -3.78987600 | -2.56063800 | 0.62449100  |
| O | -1.39927500 | -3.49185300 | 3.16463200  |
| O | -1.30419500 | -4.34226600 | -1.23869500 |
| C | -3.85280300 | -3.10782900 | -1.85892400 |
| C | -5.37996400 | -3.12890000 | -1.84215300 |
| C | -6.00098800 | -4.35954300 | -1.18551700 |
| C | -7.51577400 | -4.22065800 | -1.16572500 |
| C | -3.29036700 | -1.92845100 | -2.62239800 |
| C | -2.13397100 | -2.06434200 | -3.36422600 |
| N | -1.58916900 | -0.97642600 | -3.96306500 |
| C | -2.04928700 | 0.30843700  | -3.84475800 |
| C | -3.28823900 | 0.46722700  | -3.16404500 |
| C | -3.84311900 | -0.64216800 | -2.57135900 |
| O | -1.44240700 | -3.16785700 | -3.53540300 |
| O | -1.33909800 | 1.24167000  | -4.30427000 |
| C | -3.88332400 | 1.85663200  | -3.07809600 |

|   |             |             |             |
|---|-------------|-------------|-------------|
| C | -5.41082900 | 1.85135300  | -3.06430100 |
| C | -6.05585900 | 3.23503200  | -3.06343400 |
| C | -7.56834500 | 3.09642800  | -2.97801800 |
| C | -3.29065500 | 2.61603900  | -1.91216700 |
| C | -2.15830400 | 3.38841300  | -2.06916500 |
| N | -1.61278500 | 4.00596400  | -0.99084900 |
| C | -2.06340700 | 3.89434900  | 0.29953800  |
| C | -3.27835400 | 3.17859000  | 0.47584100  |
| C | -3.82431300 | 2.55731700  | -0.62009400 |
| O | -1.50060500 | 3.57884400  | -3.18993700 |
| O | -1.35847300 | 4.37865000  | 1.22362600  |
| C | -5.58002600 | -4.13881200 | 4.25772800  |
| C | -5.58145900 | -5.65217300 | -1.86979500 |
| C | -5.65081400 | 4.06180900  | -4.27479600 |
| C | -5.63805100 | 5.59694600  | 1.91107000  |
| H | -3.53534400 | -2.41127800 | 3.99452500  |
| H | -3.52726800 | -4.00796500 | -2.38681500 |
| H | -3.57410900 | 2.37412300  | -3.99020500 |
| H | -3.55688200 | 3.97813800  | 2.40106400  |
| H | -4.76294100 | 0.47621000  | 2.03588400  |
| H | -4.73381300 | 1.98294300  | -0.47829900 |
| H | -4.76984700 | -0.51638500 | -2.02311000 |
| H | -4.72375200 | -2.02423300 | 0.49196100  |
| H | -5.73631400 | -1.37235400 | 3.96812500  |
| H | -5.77082100 | -1.34537000 | 2.22273900  |
| H | -5.64639400 | -3.81649600 | 2.15349900  |
| H | -5.84801400 | -3.63781900 | 5.19321300  |
| H | -4.50528300 | -4.33293100 | 4.27498400  |
| H | -6.08341300 | -5.10770500 | 4.24613100  |
| H | -7.97515900 | -4.18182400 | 2.89785000  |
| H | -7.82379700 | -2.61719200 | 2.09407400  |
| H | -7.92115600 | -2.70129700 | 3.85633700  |
| H | -5.77334800 | -2.23638300 | -1.34291700 |
| H | -5.72655900 | -3.06396800 | -2.87965400 |
| H | -5.65456400 | -4.40279000 | -0.14587200 |
| H | -6.08708800 | -6.50789100 | -1.41771700 |
| H | -4.50711800 | -5.83414000 | -1.79360700 |
| H | -5.84625500 | -5.63444000 | -2.93165300 |

|   |             |             |             |
|---|-------------|-------------|-------------|
| H | -7.91776100 | -4.18522000 | -2.18274700 |
| H | -7.82777600 | -3.30708800 | -0.65200700 |
| H | -7.98178800 | -5.06580600 | -0.65500300 |
| H | -5.75360700 | 1.29497200  | -3.94369800 |
| H | -5.78762100 | 1.29664500  | -2.19785800 |
| H | -5.71708100 | 3.76764200  | -2.16609400 |
| H | -5.90528500 | 3.54207700  | -5.20382900 |
| H | -4.58027500 | 4.27812100  | -4.29160100 |
| H | -6.17435500 | 5.02001200  | -4.27860900 |
| H | -8.05055500 | 4.07452800  | -2.92286400 |
| H | -7.86924600 | 2.52565500  | -2.09506200 |
| H | -7.96336100 | 2.58120600  | -3.85871700 |
| H | -5.78388300 | 2.18333200  | 1.35683500  |
| H | -5.73627700 | 2.99701300  | 2.90093500  |
| H | -5.71266900 | 4.35988800  | 0.17808700  |
| H | -5.89032200 | 5.56706600  | 2.97570100  |
| H | -6.16130500 | 6.44861500  | 1.47159800  |
| H | -4.56739500 | 5.79537300  | 1.82426700  |
| H | -7.86305900 | 3.22864200  | 0.69881000  |
| H | -8.04327100 | 4.98481300  | 0.71955500  |
| H | -7.94898700 | 4.09165700  | 2.23839100  |
| H | -1.51761700 | 2.74029300  | -3.74762000 |
| H | -1.50161000 | 3.74128500  | 2.68463200  |
| H | -0.59190200 | -4.34173900 | 1.10427900  |
| H | -0.66405700 | -1.10804800 | -4.38544400 |
| H | -0.69867700 | 4.44835800  | -1.12922300 |
| H | -0.66925500 | 1.11497500  | 4.40737800  |
| H | -1.46951000 | -2.67657600 | 3.75706900  |
| H | -1.47685600 | -3.74491700 | -2.70837700 |
| C | -0.27945900 | -1.11071300 | -0.99459400 |
| H | 0.18567000  | -0.93595100 | -1.96080900 |
| H | 0.05050900  | -2.06427500 | -0.59578300 |
| H | -1.36354000 | -1.10235800 | -1.08614000 |
| C | -0.46684800 | -0.29783200 | 1.26765300  |
| H | -0.12211900 | -1.26477500 | 1.62679300  |
| H | -0.14352200 | 0.48804400  | 1.94491500  |
| H | -1.55126400 | -0.29675900 | 1.18111500  |
| C | -0.35783600 | 1.26396900  | -0.56136000 |

|   |             |             |             |
|---|-------------|-------------|-------------|
| H | -0.05407900 | 2.03322900  | 0.14297900  |
| H | 0.07919800  | 1.45622300  | -1.53832300 |
| H | -1.44259700 | 1.22855700  | -0.63831600 |
| C | 1.59969500  | -0.01123900 | 0.06012300  |
| H | 1.94004300  | -0.97160600 | 0.43898500  |
| H | 2.03213900  | 0.17688300  | -0.91889500 |
| H | 1.87909400  | 0.78000300  | 0.75102800  |
| N | 0.12660000  | -0.04038000 | -0.06131700 |

[1<sub>2</sub>+Me<sub>4</sub>N<sub>exo</sub>]<sup>+</sup>

Energy = -4963.810052 hartree

Number of imaginary frequencies (PBE0-D3/def2-SVP) = 0

XYZ

|   |             |             |             |
|---|-------------|-------------|-------------|
| N | -0.91307100 | 0.97605900  | 3.96283600  |
| C | -1.47598400 | 2.06220800  | 3.38562700  |
| C | -2.67737100 | 1.93778200  | 2.71217400  |
| C | -3.24312100 | 0.66169100  | 2.69386500  |
| C | -2.68381400 | -0.44319500 | 3.28635300  |
| C | -1.42109900 | -0.29327700 | 3.92147700  |
| C | -3.27926100 | -1.83002000 | 3.20745200  |
| C | -4.80571600 | -1.82139200 | 3.23796200  |
| C | -5.46796000 | -3.19584600 | 3.20667600  |
| C | -6.98154800 | -3.03696800 | 3.22163800  |
| C | -3.26854800 | 3.12514300  | 1.98708100  |
| C | -4.79518800 | 3.13466500  | 2.02636300  |
| C | -5.46259500 | 4.33776300  | 1.36597100  |
| C | -6.97536500 | 4.20363200  | 1.46630300  |
| O | -0.78983600 | 3.16797800  | 3.53843500  |
| O | -0.73948900 | -1.23038600 | 4.41476400  |
| C | -2.71429600 | -2.57143500 | 2.01770600  |
| C | -1.55284400 | -3.31288100 | 2.13315600  |
| N | -1.03080800 | -3.91780600 | 1.04053100  |
| C | -1.55380100 | -3.85590300 | -0.22240200 |
| C | -2.77892300 | -3.14929100 | -0.36035600 |
| C | -3.28534500 | -2.51614200 | 0.74689200  |
| O | -0.87519700 | -3.50325600 | 3.23738500  |
| O | -0.91801900 | -4.39347300 | -1.16713700 |



|   |             |             |             |
|---|-------------|-------------|-------------|
| C | -3.40892500 | -3.05685700 | -1.73293500 |
| C | -4.93406400 | -3.07752300 | -1.67939800 |
| C | -5.51386400 | -4.37684200 | -1.12347900 |
| C | -6.96406700 | -4.18104100 | -0.71148100 |
| C | -2.85104000 | -1.87406700 | -2.48770700 |
| C | -1.68187100 | -2.01590700 | -3.21399500 |
| N | -1.13118100 | -0.93977800 | -3.81968600 |
| C | -1.61876400 | 0.33594100  | -3.75566400 |
| C | -2.84890200 | 0.50518000  | -3.06147200 |
| C | -3.40070500 | -0.59056300 | -2.44378400 |
| O | -1.01925300 | -3.13098800 | -3.39323200 |
| O | -0.94980200 | 1.26284100  | -4.28220900 |
| C | -3.40106400 | 1.90605800  | -2.95434500 |
| C | -4.92554500 | 1.96159900  | -2.90759000 |
| C | -5.49241700 | 3.37687800  | -2.99876900 |
| C | -6.94437800 | 3.40077000  | -2.54891300 |
| C | -2.76421500 | 2.63322000  | -1.79060800 |
| C | -1.60221800 | 3.36102000  | -1.96387700 |
| N | -1.01825800 | 3.95899400  | -0.89957200 |
| C | -1.47831300 | 3.90496300  | 0.38862600  |
| C | -2.70513300 | 3.21381600  | 0.58733700  |
| C | -3.27236100 | 2.58564000  | -0.49114200 |
| O | -0.97876900 | 3.54629900  | -3.10183800 |
| O | -0.78962500 | 4.43341900  | 1.29901400  |
| C | -5.00746800 | -4.08688100 | 4.35014800  |
| C | -5.38211000 | -5.52423800 | -2.11377100 |
| C | -5.34826800 | 3.95556600  | -4.39832900 |
| C | -4.99747800 | 5.65771700  | 1.96166700  |
| H | -2.94514900 | -2.35664500 | 4.10564500  |
| H | -3.09871300 | -3.95257000 | -2.27850500 |
| H | -3.09148500 | 2.42402800  | -3.86639100 |
| H | -2.93068100 | 4.01929400  | 2.51810500  |
| H | -4.18769400 | 0.53755800  | 2.17621900  |
| H | -4.18548300 | 2.02285000  | -0.32330800 |
| H | -4.31824300 | -0.45165100 | -1.87973600 |
| H | -4.19877400 | -1.94010000 | 0.63533500  |
| H | -5.12018800 | -1.28946100 | 4.14312400  |
| H | -5.19870600 | -1.23364500 | 2.39877200  |

|   |             |             |             |
|---|-------------|-------------|-------------|
| H | -5.18769400 | -3.68714900 | 2.26693900  |
| H | -5.19440500 | -3.60937500 | 5.31697600  |
| H | -3.94144600 | -4.31197400 | 4.28662500  |
| H | -5.54299200 | -5.03868300 | 4.34024100  |
| H | -7.48588900 | -4.00109200 | 3.12608000  |
| H | -7.32151800 | -2.39831500 | 2.39806100  |
| H | -7.31749000 | -2.57643300 | 4.15563300  |
| H | -5.29356100 | -2.23754400 | -1.07062600 |
| H | -5.32126800 | -2.90828700 | -2.69146700 |
| H | -4.94681300 | -4.63606300 | -0.22222900 |
| H | -5.77352700 | -6.45157500 | -1.69054600 |
| H | -4.34247300 | -5.70722400 | -2.39010100 |
| H | -5.94041700 | -5.31279700 | -3.03118700 |
| H | -7.57396500 | -3.85588100 | -1.56312800 |
| H | -7.03684300 | -3.43519900 | 0.08803200  |
| H | -7.40402500 | -5.10563900 | -0.33188800 |
| H | -5.32267200 | 1.35385200  | -3.72953800 |
| H | -5.28387400 | 1.49403500  | -1.98106500 |
| H | -4.92243800 | 4.00901000  | -2.30820400 |
| H | -5.90510600 | 3.35734100  | -5.12642900 |
| H | -4.30621900 | 3.98903600  | -4.72021900 |
| H | -5.73364400 | 4.97636400  | -4.43986000 |
| H | -7.37419900 | 4.40165500  | -2.62638600 |
| H | -7.02429500 | 3.09430200  | -1.49983300 |
| H | -7.55856300 | 2.73378800  | -3.16599000 |
| H | -5.19204900 | 2.22465000  | 1.55892300  |
| H | -5.10276500 | 3.08417600  | 3.07723000  |
| H | -5.19144900 | 4.33651200  | 0.30348100  |
| H | -5.17651000 | 5.68375600  | 3.04103500  |
| H | -5.53617300 | 6.49619800  | 1.51493200  |
| H | -3.93255700 | 5.82769900  | 1.79361200  |
| H | -7.31897700 | 3.25589300  | 1.03560300  |
| H | -7.48446700 | 5.01359900  | 0.93922100  |
| H | -7.30219900 | 4.22834400  | 2.51026000  |
| H | -1.02373600 | 2.71059300  | -3.66858800 |
| H | -0.85788400 | 3.76046200  | 2.72310400  |
| H | -0.08737900 | -4.32512100 | 1.14671800  |
| H | -0.18854500 | -1.07440000 | -4.22369500 |

|   |             |             |             |
|---|-------------|-------------|-------------|
| H | -0.07570500 | 4.35278000  | -1.05296700 |
| H | 0.04783300  | 1.09684500  | 4.32377900  |
| H | -0.87969400 | -2.66475900 | 3.80691600  |
| H | -1.04777000 | -3.71959300 | -2.56891300 |
| N | 2.08256000  | -0.93318100 | 3.90025700  |
| C | 2.61481100  | -2.02452600 | 3.30346000  |
| C | 3.77529700  | -1.90370200 | 2.56665800  |
| C | 4.34039400  | -0.62657100 | 2.51233900  |
| C | 3.80275800  | 0.48600800  | 3.11607600  |
| C | 2.57343600  | 0.33898100  | 3.80922100  |
| C | 4.39608800  | 1.87177200  | 2.99729500  |
| C | 5.92216800  | 1.87085900  | 2.94776000  |
| C | 6.56298600  | 3.25589900  | 2.91173300  |
| C | 8.07280000  | 3.12232700  | 2.78256400  |
| C | 4.32254000  | -3.10046300 | 1.82302900  |
| C | 5.84881500  | -3.12408500 | 1.77491600  |
| C | 6.45541300  | -4.36318000 | 1.12136700  |
| C | 7.96976200  | -4.22835700 | 1.06864800  |
| O | 1.93273700  | -3.12934500 | 3.50313200  |
| O | 1.89364600  | 1.27569200  | 4.31815400  |
| C | 3.76972800  | 2.60180000  | 1.83089900  |
| C | 2.62409100  | 3.35000900  | 2.00309700  |
| N | 2.04680100  | 3.94719400  | 0.93371400  |
| C | 2.48828400  | 3.86073900  | -0.35756400 |
| C | 3.70456900  | 3.15932500  | -0.55508300 |
| C | 4.27505200  | 2.54037600  | 0.53080700  |
| O | 2.00084400  | 3.55704900  | 3.14092500  |
| O | 1.77859000  | 4.37889400  | -1.26709500 |
| C | 4.27351400  | 3.05479600  | -1.95290600 |
| C | 5.80043200  | 3.05459000  | -1.98341700 |
| C | 6.45873900  | 4.28274400  | -1.35982100 |
| C | 7.97164100  | 4.12632300  | -1.38850800 |
| C | 3.66968900  | 1.86737900  | -2.66713400 |
| C | 2.47438100  | 2.00752200  | -3.34222500 |
| N | 1.89416600  | 0.92486900  | -3.90968500 |
| C | 2.36777400  | -0.35529400 | -3.84313700 |
| C | 3.62920900  | -0.52251800 | -3.21594300 |
| C | 4.21603200  | 0.58136500  | -2.64235600 |

|   |            |             |             |
|---|------------|-------------|-------------|
| O | 1.80085700 | 3.12317600  | -3.50621200 |
| O | 1.64567900 | -1.28041700 | -4.31460500 |
| C | 4.20647100 | -1.91737900 | -3.12786200 |
| C | 5.73292700 | -1.93996500 | -3.15846700 |
| C | 6.35360800 | -3.33458100 | -3.15311100 |
| C | 7.87013100 | -3.22384400 | -3.10897000 |
| C | 3.63093200 | -2.63852100 | -1.93027000 |
| C | 2.46715600 | -3.36926000 | -2.04267300 |
| N | 1.93702200 | -3.95820300 | -0.94489200 |
| C | 2.44511600 | -3.87837600 | 0.32211700  |
| C | 3.68099700 | -3.19586400 | 0.45630100  |
| C | 4.20400600 | -2.58556100 | -0.65787800 |
| O | 1.78262300 | -3.56661100 | -3.14708600 |
| O | 1.77468100 | -4.38499500 | 1.26677100  |
| C | 6.19200000 | 4.09618700  | 4.12469700  |
| C | 6.03188600 | 5.57486400  | -2.04042800 |
| C | 5.90247100 | -4.17256200 | -4.34021100 |
| C | 6.04754600 | -5.64708800 | 1.82866000  |
| H | 4.10517400 | 2.40621400  | 3.90577400  |
| H | 3.94341400 | 3.94635100  | -2.49301500 |
| H | 3.86027800 | -2.44688100 | -4.01969800 |
| H | 4.00667000 | -3.98681400 | 2.37993400  |
| H | 5.26321600 | -0.50748000 | 1.95622200  |
| H | 5.13226500 | -2.03489800 | -0.54672200 |
| H | 5.16483600 | 0.44711700  | -2.13562300 |
| H | 5.18762500 | 1.97548800  | 0.37163100  |
| H | 6.28845100 | 1.32745200  | 3.82607500  |
| H | 6.27977900 | 1.30598900  | 2.07999400  |
| H | 6.19442900 | 3.77645200  | 2.01942700  |
| H | 6.47617300 | 3.58793700  | 5.05168900  |
| H | 5.12136900 | 4.30668800  | 4.17029100  |
| H | 6.71154000 | 5.05667600  | 4.10127400  |
| H | 8.55017700 | 4.10142200  | 2.70242700  |
| H | 8.34856900 | 2.54284600  | 1.89709300  |
| H | 8.49582700 | 2.61711000  | 3.65630300  |
| H | 6.19622100 | 2.16285000  | -1.48519700 |
| H | 6.11493000 | 2.97222500  | -3.03011100 |
| H | 6.14676400 | 4.33875900  | -0.31012900 |

|   |             |             |             |
|---|-------------|-------------|-------------|
| H | 6.56194800  | 6.42872100  | -1.61269400 |
| H | 4.96251100  | 5.76721900  | -1.92981700 |
| H | 6.26032400  | 5.54490100  | -3.11064100 |
| H | 8.33929600  | 4.07570400  | -2.41803900 |
| H | 8.28886800  | 3.21359000  | -0.87650500 |
| H | 8.46487100  | 4.97041100  | -0.90149700 |
| H | 6.06086300  | -1.40338100 | -4.05594500 |
| H | 6.14432400  | -1.37959900 | -2.31188900 |
| H | 6.02778900  | -3.84686200 | -2.23964000 |
| H | 6.14256500  | -3.67180400 | -5.28362000 |
| H | 4.82769500  | -4.36578400 | -4.32513200 |
| H | 6.40720000  | -5.14119200 | -4.34193800 |
| H | 8.33629200  | -4.20993100 | -3.05183900 |
| H | 8.20375400  | -2.64610500 | -2.24248800 |
| H | 8.25131400  | -2.72777600 | -4.00687500 |
| H | 6.23201800  | -2.23928700 | 1.25499800  |
| H | 6.21791000  | -3.04483800 | 2.80386000  |
| H | 6.08700100  | -4.41765800 | 0.09003200  |
| H | 6.33401500  | -5.61728500 | 2.88481300  |
| H | 6.54138600  | -6.50978700 | 1.37602300  |
| H | 4.97111100  | -5.82426400 | 1.77691700  |
| H | 8.27208900  | -3.32201300 | 0.53665700  |
| H | 8.42433700  | -5.08113100 | 0.55963500  |
| H | 8.39249300  | -4.17948400 | 2.07689200  |
| H | 1.79612400  | -2.73079700 | -3.71580200 |
| H | 1.95246800  | -3.72050500 | 2.68331600  |
| H | 1.13291100  | 4.38391300  | 1.09235900  |
| H | 0.95429100  | 1.06356600  | -4.29664300 |
| H | 1.00928900  | -4.38006900 | -1.05572800 |
| H | 1.16080500  | -1.05698000 | 4.33418000  |
| H | 2.03233100  | 2.72140800  | 3.71000900  |
| H | 1.87215900  | 3.71334700  | -2.68746100 |
| C | -7.28781800 | 0.09423100  | 0.35978800  |
| H | -7.57253400 | 0.33794700  | 1.38170000  |
| H | -6.70917500 | -0.82777300 | 0.34462300  |
| H | -6.70764700 | 0.90935500  | -0.06936900 |
| C | -8.12216300 | -0.43411700 | -1.85490200 |
| H | -7.53269100 | -1.34944600 | -1.84316000 |

|   |              |             |             |
|---|--------------|-------------|-------------|
| H | -9.02296000  | -0.57570700 | -2.44940200 |
| H | -7.53146900  | 0.38665100  | -2.25837400 |
| C | -9.32198300  | 1.15145100  | -0.45105100 |
| H | -10.22330700 | 0.99034800  | -1.03973900 |
| H | -9.58606100  | 1.39488100  | 0.57655500  |
| H | -8.73148800  | 1.95481900  | -0.88643600 |
| C | -9.32426500  | -1.21141900 | 0.11346900  |
| H | -8.73575800  | -2.12611100 | 0.08746600  |
| H | -9.58745200  | -0.96407700 | 1.14036300  |
| H | -10.22604900 | -1.33151700 | -0.48426100 |
| N | -8.51596500  | -0.09976800 | -0.45763200 |

[1<sub>2</sub>+Me<sub>4</sub>N<sub>exo2</sub>]<sup>+</sup>

Energy = -4963.8331111 hartree

Number of imaginary frequencies (PBE0-D3/def2-SVP) = 0

XYZ

|   |             |             |             |
|---|-------------|-------------|-------------|
| N | -1.36744500 | -2.80966300 | -2.30329600 |
| C | -1.93212900 | -3.34052800 | -1.19174200 |
| C | -3.15553000 | -2.87947300 | -0.76131400 |
| C | -3.74937500 | -1.88195200 | -1.54455200 |
| C | -3.18562000 | -1.34366400 | -2.67723300 |
| C | -1.89778500 | -1.80162400 | -3.06354600 |
| C | -3.80848300 | -0.21666800 | -3.47003600 |
| C | -5.33404100 | -0.27310700 | -3.50578400 |
| C | -5.99244500 | 0.80884000  | -4.35788600 |
| C | -7.50591100 | 0.69581000  | -4.25598800 |
| C | -3.72952100 | -3.39562400 | 0.53873500  |
| C | -5.25477600 | -3.46355900 | 0.53264200  |
| C | -5.87929600 | -4.06965800 | 1.78688100  |
| C | -7.39603300 | -4.01027700 | 1.68759600  |
| O | -1.21595500 | -4.28614300 | -0.62038400 |
| O | -1.20203300 | -1.35541200 | -4.01673700 |
| C | -3.28010400 | 1.10945200  | -2.97134600 |
| C | -2.15437200 | 1.67565500  | -3.52666800 |
| N | -1.66644300 | 2.83431600  | -3.02673800 |
| C | -2.19301200 | 3.52311900  | -1.96802900 |
| C | -3.39878100 | 3.00444100  | -1.42249100 |

|   |             |             |             |
|---|-------------|-------------|-------------|
| C | -3.87116900 | 1.81646000  | -1.91854600 |
| O | -1.46685000 | 1.19397800  | -4.54332600 |
| O | -1.57100000 | 4.53255700  | -1.54193600 |
| C | -4.05855000 | 3.74290900  | -0.27875100 |
| C | -5.58349100 | 3.66501100  | -0.31402000 |
| C | -6.22925200 | 4.21279300  | -1.58431100 |
| C | -7.73549800 | 4.00762900  | -1.52553100 |
| C | -3.47551900 | 3.28553100  | 1.03883000  |
| C | -2.33402000 | 3.88546100  | 1.53438700  |
| N | -1.77052500 | 3.42083600  | 2.67308000  |
| C | -2.21569500 | 2.34937800  | 3.39443400  |
| C | -3.42443800 | 1.75404600  | 2.95067200  |
| C | -3.99134500 | 2.22760100  | 1.79083300  |
| O | -1.70211300 | 4.90581200  | 1.00362300  |
| O | -1.51676800 | 1.95620500  | 4.37165500  |
| C | -3.96059500 | 0.56858300  | 3.72050900  |
| C | -5.48453300 | 0.47895900  | 3.70689600  |
| C | -6.06834900 | -0.65659600 | 4.54365100  |
| C | -7.58080700 | -0.69006400 | 4.38368000  |
| C | -3.29010400 | -0.69705300 | 3.23668700  |
| C | -2.10095700 | -1.12173300 | 3.80102500  |
| N | -1.48449800 | -2.22264000 | 3.30912800  |
| C | -1.92523400 | -2.96871700 | 2.25542700  |
| C | -3.16902800 | -2.59853800 | 1.69700700  |
| C | -3.78542100 | -1.47025200 | 2.19075900  |
| O | -1.47697500 | -0.55088500 | 4.79901300  |
| O | -1.17732300 | -3.91259300 | 1.84278200  |
| C | -5.53770400 | 0.75882500  | -5.80895000 |
| C | -5.88827500 | 5.67668100  | -1.82050000 |
| C | -5.67805600 | -0.55287900 | 6.01062600  |
| C | -5.40527600 | -5.49354000 | 2.03758600  |
| H | -3.45901300 | -0.33757400 | -4.49893300 |
| H | -3.78978100 | 4.79666900  | -0.39186600 |
| H | -3.65653700 | 0.71750100  | 4.76011200  |
| H | -3.36273300 | -4.41923600 | 0.65671700  |
| H | -4.71907900 | -1.50990400 | -1.23466400 |
| H | -4.72589200 | -1.16704200 | 1.74314700  |
| H | -4.89829100 | 1.75167200  | 1.43550300  |

|   |             |             |             |
|---|-------------|-------------|-------------|
| H | -4.77333600 | 1.40483600  | -1.47793100 |
| H | -5.62961500 | -1.25862200 | -3.88395000 |
| H | -5.74663100 | -0.20762500 | -2.49326800 |
| H | -5.70019600 | 1.78380400  | -3.94979700 |
| H | -5.74256100 | -0.22324600 | -6.24764900 |
| H | -4.46969800 | 0.96100700  | -5.91512900 |
| H | -6.06952500 | 1.50381600  | -6.40463900 |
| H | -7.99915700 | 1.49334200  | -4.81569500 |
| H | -7.84261800 | 0.75985600  | -3.21760900 |
| H | -7.85454800 | -0.25900600 | -4.66169800 |
| H | -5.92041200 | 2.63163700  | -0.17586300 |
| H | -5.96733400 | 4.21876100  | 0.55031100  |
| H | -5.84487200 | 3.63802700  | -2.43550400 |
| H | -6.40994400 | 6.05648000  | -2.70170400 |
| H | -4.81965000 | 5.83231000  | -1.98324900 |
| H | -6.19161100 | 6.28964800  | -0.96582500 |
| H | -8.17381000 | 4.57099800  | -0.69608400 |
| H | -7.99046000 | 2.95363700  | -1.38315800 |
| H | -8.21608000 | 4.34600000  | -2.44611400 |
| H | -5.88059700 | 1.43370400  | 4.07030300  |
| H | -5.85674400 | 0.37656600  | 2.68155100  |
| H | -5.66887900 | -1.60279800 | 4.15792100  |
| H | -5.99530600 | 0.40692800  | 6.43037700  |
| H | -4.60025700 | -0.64552300 | 6.16015500  |
| H | -6.15640200 | -1.34305000 | 6.59350600  |
| H | -8.01758200 | -1.52668700 | 4.93345700  |
| H | -7.87010000 | -0.79199000 | 3.33390500  |
| H | -8.03354800 | 0.23007700  | 4.76541000  |
| H | -5.68430200 | -2.46733600 | 0.38227200  |
| H | -5.56260400 | -4.05165100 | -0.33989400 |
| H | -5.57465700 | -3.46046500 | 2.64585200  |
| H | -5.62717400 | -6.13416600 | 1.17764700  |
| H | -5.91110000 | -5.92038800 | 2.90627100  |
| H | -4.33127000 | -5.54400400 | 2.23011700  |
| H | -7.74668200 | -2.98577800 | 1.53631000  |
| H | -7.86594700 | -4.39197200 | 2.59649400  |
| H | -7.75682600 | -4.61335700 | 0.84857000  |
| H | -1.56666300 | 0.46343600  | 4.74346000  |



|   |             |             |             |
|---|-------------|-------------|-------------|
| H | -1.26118700 | -4.21152400 | 0.41682900  |
| H | -0.74934800 | 3.13582900  | -3.37696000 |
| H | -0.85518500 | 3.81864900  | 2.92372500  |
| H | -0.54439800 | -2.41971800 | 3.67661800  |
| H | -0.39240300 | -3.06774700 | -2.48837600 |
| H | -1.42336100 | 0.19719500  | -4.48114000 |
| H | -1.73592400 | 4.87201600  | -0.00401400 |
| N | 1.57809800  | -1.19566400 | -3.42368500 |
| C | 2.06332400  | 0.05559800  | -3.60372800 |
| C | 3.23689900  | 0.42983000  | -2.96352600 |
| C | 3.83638200  | -0.53462600 | -2.16378400 |
| C | 3.33628300  | -1.80980100 | -1.97232800 |
| C | 2.13274800  | -2.14549900 | -2.62013900 |
| C | 3.96513800  | -2.80590600 | -1.02305700 |
| C | 5.49003500  | -2.74614100 | -0.99697100 |
| C | 6.15084100  | -3.81517800 | -0.13019900 |
| C | 7.66109500  | -3.63648800 | -0.14800300 |
| C | 3.74432400  | 1.84641100  | -3.10754900 |
| C | 5.26831900  | 1.93760400  | -3.07894900 |
| C | 5.83327200  | 3.33533100  | -3.31906600 |
| C | 7.34888600  | 3.30593300  | -3.19219600 |
| O | 1.34669700  | 0.80250300  | -4.39375500 |
| O | 1.50430800  | -3.25891300 | -2.49800900 |
| C | 3.34480700  | -2.68125300 | 0.35066300  |
| C | 2.21722100  | -3.39753600 | 0.66781600  |
| N | 1.62218600  | -3.24003300 | 1.87007600  |
| C | 2.04345800  | -2.37575000 | 2.84658200  |
| C | 3.24755400  | -1.66320500 | 2.57529500  |
| C | 3.82951400  | -1.82035400 | 1.34511900  |
| O | 1.62117200  | -4.27001700 | -0.13413000 |
| O | 1.34008800  | -2.25530600 | 3.88025000  |
| C | 3.77589900  | -0.71042700 | 3.62499100  |
| C | 5.30106900  | -0.63622400 | 3.65660400  |
| C | 6.00891400  | -1.96336600 | 3.91859800  |
| C | 7.51558300  | -1.76781100 | 3.83917000  |
| C | 3.12304000  | 0.64432100  | 3.46576700  |
| C | 1.92701700  | 0.91762100  | 4.09767700  |
| N | 1.30853400  | 2.10185500  | 3.88705700  |

|   |            |             |             |
|---|------------|-------------|-------------|
| C | 1.75419200 | 3.08797300  | 3.05162200  |
| C | 3.02026500 | 2.86921000  | 2.44429400  |
| C | 3.63750000 | 1.66057900  | 2.65343600  |
| O | 1.28696000 | 0.12228800  | 4.92677100  |
| O | 1.01368000 | 4.09059300  | 2.86151800  |
| C | 3.55992300 | 3.93939600  | 1.52342100  |
| C | 5.08418200 | 4.02935600  | 1.53147900  |
| C | 5.66467700 | 5.14995600  | 0.67264900  |
| C | 7.18433600 | 5.08678300  | 0.70058300  |
| C | 2.98754200 | 3.75610600  | 0.13645300  |
| C | 1.79730300 | 4.36014000  | -0.22291900 |
| N | 1.27552200 | 4.13561400  | -1.45190700 |
| C | 1.82230700 | 3.32221800  | -2.40319700 |
| C | 3.07194700 | 2.73762200  | -2.08740400 |
| C | 3.58796500 | 2.95415900  | -0.83156500 |
| O | 1.08608800 | 5.16223600  | 0.53036800  |
| O | 1.17090800 | 3.12856300  | -3.47267600 |
| C | 5.76368000 | -5.22464000 | -0.55641800 |
| C | 5.60955800 | -2.57690300 | 5.25250600  |
| C | 5.16811100 | 6.52277900  | 1.10133400  |
| C | 5.40962400 | 3.90656500  | -4.66409000 |
| H | 3.69854700 | -3.79701600 | -1.39873900 |
| H | 3.45397500 | -1.10323100 | 4.59310400  |
| H | 3.18038200 | 4.89021700  | 1.90694300  |
| H | 3.42016700 | 2.19519300  | -4.09201100 |
| H | 4.75474100 | -0.26771000 | -1.65386200 |
| H | 4.53233000 | 2.48298600  | -0.57951300 |
| H | 4.58686800 | 1.48231700  | 2.16106900  |
| H | 4.72887800 | -1.25255700 | 1.13068700  |
| H | 5.85350800 | -2.84111400 | -2.02680300 |
| H | 5.83311700 | -1.76555700 | -0.65198500 |
| H | 5.80672300 | -3.67506500 | 0.90140300  |
| H | 6.00391700 | -5.39036100 | -1.61266000 |
| H | 4.69763300 | -5.41664000 | -0.40881500 |
| H | 6.31108700 | -5.96824100 | 0.02671400  |
| H | 8.15217100 | -4.35623100 | 0.51029700  |
| H | 7.94659500 | -2.63452900 | 0.18259600  |
| H | 8.06080800 | -3.78049300 | -1.15655100 |

|   |            |             |             |
|---|------------|-------------|-------------|
| H | 5.68646600 | -0.21907000 | 2.71977000  |
| H | 5.58422600 | 0.08026900  | 4.43571300  |
| H | 5.71908800 | -2.66550500 | 3.12709300  |
| H | 6.17290200 | -3.49379400 | 5.43957600  |
| H | 4.54856900 | -2.83300000 | 5.29014900  |
| H | 5.81804000 | -1.88643500 | 6.07571600  |
| H | 7.86070700 | -1.07846500 | 4.61562400  |
| H | 7.81514200 | -1.35451600 | 2.87182500  |
| H | 8.04468100 | -2.71331200 | 3.97767000  |
| H | 5.40804000 | 4.16670300  | 2.56924300  |
| H | 5.52912700 | 3.08238600  | 1.20602400  |
| H | 5.34076600 | 4.98610700  | -0.36248700 |
| H | 5.40487200 | 6.71129400  | 2.15327600  |
| H | 4.08888300 | 6.63082600  | 0.97443000  |
| H | 5.64491500 | 7.30696100  | 0.50926500  |
| H | 7.62289100 | 5.84755900  | 0.05115600  |
| H | 7.55045800 | 4.11148700  | 0.36738700  |
| H | 7.56319400 | 5.25651600  | 1.71306800  |
| H | 5.65943600 | 1.56978400  | -2.12390000 |
| H | 5.66189000 | 1.25709200  | -3.84306400 |
| H | 5.44330400 | 3.99692300  | -2.53677900 |
| H | 5.71560700 | 3.24622800  | -5.48199200 |
| H | 5.87646400 | 4.87929800  | -4.83269300 |
| H | 4.32908000 | 4.04964700  | -4.73198100 |
| H | 7.66141400 | 2.92285100  | -2.21673600 |
| H | 7.77325500 | 4.30537000  | -3.30860600 |
| H | 7.79292800 | 2.66548900  | -3.96064700 |
| H | 1.11925800 | 4.85914400  | 1.49612700  |
| H | 1.35442800 | 1.79445000  | -4.10379700 |
| H | 0.70192500 | -3.68274700 | 1.99649700  |
| H | 0.35763500 | 2.19480500  | 4.27008700  |
| H | 0.32521200 | 4.49420000  | -1.61893900 |
| H | 0.63761600 | -1.37255700 | -3.81251000 |
| H | 1.61964400 | -3.89832400 | -1.07213700 |
| H | 1.38107100 | -0.83519100 | 4.64633500  |
| C | 1.10087300 | -8.07241000 | -3.94899000 |
| H | 0.07637300 | -8.32200100 | -4.21956500 |
| H | 1.73960400 | -8.12045100 | -4.82920200 |

|   |             |             |             |
|---|-------------|-------------|-------------|
| H | 1.46202900  | -8.76378900 | -3.18951400 |
| C | 2.52914000  | -6.33239800 | -3.03104000 |
| H | 3.16192300  | -6.44285600 | -3.91034800 |
| H | 2.53193500  | -5.29733400 | -2.69423400 |
| H | 2.86831000  | -6.99730900 | -2.23895000 |
| C | 0.26310400  | -6.62096200 | -2.19295900 |
| H | 0.25618000  | -5.60893100 | -1.79827300 |
| H | -0.74790700 | -6.90821900 | -2.47616900 |
| H | 0.65026300  | -7.30621900 | -1.44116400 |
| C | 0.63924400  | -5.73044400 | -4.42360600 |
| H | 1.24993800  | -5.83012900 | -5.31968400 |
| H | -0.39897600 | -5.96393800 | -4.65294700 |
| H | 0.73245100  | -4.72405700 | -4.01607800 |
| N | 1.13295100  | -6.69404800 | -3.40051800 |

[1<sub>2</sub>+Me<sub>4</sub>N<sub>endo</sub>+I<sub>endo</sub>]

Energy = -5261.76350626 hartree

Number of imaginary frequencies (PBE0-D3/def2-SVP) = 0

XYZ

|   |             |             |             |
|---|-------------|-------------|-------------|
| N | -2.91760500 | -1.97249600 | -3.71286800 |
| C | -3.56258100 | -2.80995300 | -2.86585700 |
| C | -4.55108900 | -2.31130400 | -2.03438600 |
| C | -4.85644800 | -0.95407400 | -2.17435400 |
| C | -4.21507000 | -0.11182100 | -3.04819800 |
| C | -3.12961600 | -0.62570600 | -3.80699000 |
| C | -4.51515300 | 1.35952000  | -3.18880500 |
| C | -6.00907000 | 1.66974500  | -3.12480100 |
| C | -6.37739300 | 3.13009200  | -3.37312600 |
| C | -7.87460900 | 3.32526400  | -3.18743800 |
| C | -5.16942600 | -3.19221500 | -0.97172900 |
| C | -6.64662700 | -2.89940300 | -0.72899500 |
| C | -7.33529100 | -3.82999000 | 0.26620700  |
| C | -8.77407700 | -3.38409100 | 0.47948400  |
| O | -3.15922600 | -4.05630400 | -2.92466300 |
| O | -2.35455100 | 0.06356600  | -4.51661200 |
| C | -3.69995600 | 2.16705400  | -2.20479000 |
| C | -2.40623600 | 2.56583200  | -2.51008500 |

|   |             |             |             |
|---|-------------|-------------|-------------|
| N | -1.72366700 | 3.32258100  | -1.60824800 |
| C | -2.17901800 | 3.68581300  | -0.36538100 |
| C | -3.47624700 | 3.24392300  | -0.01360800 |
| C | -4.17751800 | 2.51106000  | -0.94262200 |
| O | -1.74019700 | 2.27508600  | -3.58990200 |
| O | -1.40584600 | 4.34470000  | 0.38806100  |
| C | -3.98791200 | 3.52215100  | 1.38336400  |
| C | -5.50743600 | 3.63289600  | 1.47502200  |
| C | -6.13135300 | 4.73090100  | 0.61719800  |
| C | -7.64595500 | 4.69282600  | 0.75434300  |
| C | -3.41759100 | 2.49050700  | 2.33229600  |
| C | -2.22508000 | 2.73164300  | 2.98170800  |
| N | -1.64201300 | 1.75432500  | 3.71594300  |
| C | -2.11608100 | 0.47816000  | 3.83338200  |
| C | -3.41470900 | 0.24469400  | 3.31007900  |
| C | -3.99339300 | 1.23371700  | 2.55153800  |
| O | -1.54516200 | 3.85954400  | 2.94435500  |
| O | -1.36572400 | -0.40313500 | 4.33865600  |
| C | -4.03103800 | -1.11290600 | 3.53924800  |
| C | -5.52809800 | -1.02758500 | 3.83804100  |
| C | -6.19311100 | -2.35799100 | 4.17999600  |
| C | -7.68916200 | -2.15497800 | 4.36606000  |
| C | -3.71112500 | -2.06789200 | 2.41408200  |
| C | -2.57388900 | -2.84070500 | 2.44167300  |
| N | -2.35572100 | -3.73872500 | 1.44747000  |
| C | -3.16118600 | -3.94141400 | 0.34587800  |
| C | -4.31734700 | -3.10193500 | 0.27370200  |
| C | -4.54395000 | -2.22036600 | 1.29183900  |
| O | -1.62251600 | -2.81345200 | 3.35461100  |
| O | -2.82721400 | -4.79775900 | -0.48689600 |
| C | -5.93250400 | 3.60956100  | -4.74689000 |
| C | -5.58891500 | 6.11019500  | 0.96100400  |
| C | -5.57461400 | -3.01173600 | 5.40674900  |
| C | -7.27712000 | -5.28667000 | -0.16933600 |
| H | -4.17089800 | 1.63606800  | -4.18929100 |
| H | -3.57734700 | 4.48826300  | 1.68713100  |
| H | -3.55113800 | -1.50629900 | 4.43955700  |
| H | -5.09368500 | -4.22169200 | -1.33107200 |

|   |             |             |             |
|---|-------------|-------------|-------------|
| H | -5.64805700 | -0.54571500 | -1.55477400 |
| H | -5.43173700 | -1.59870000 | 1.23989100  |
| H | -4.95185200 | 1.02684700  | 2.08724000  |
| H | -5.17543500 | 2.17810300  | -0.67882800 |
| H | -6.51001600 | 1.04263900  | -3.87068000 |
| H | -6.42633500 | 1.36445400  | -2.15871800 |
| H | -5.86308700 | 3.74403300  | -2.62387500 |
| H | -6.36998800 | 2.98893900  | -5.53540500 |
| H | -4.84707300 | 3.58177200  | -4.86219000 |
| H | -6.25282700 | 4.63979300  | -4.91872300 |
| H | -8.15596500 | 4.37287200  | -3.31789800 |
| H | -8.19741000 | 3.01404200  | -2.19006500 |
| H | -8.43742700 | 2.73650800  | -3.91849200 |
| H | -5.98026500 | 2.67938700  | 1.21487000  |
| H | -5.76510100 | 3.81190500  | 2.52522200  |
| H | -5.88362600 | 4.52773000  | -0.43102500 |
| H | -6.09647700 | 6.88026700  | 0.37562400  |
| H | -4.52004500 | 6.19638500  | 0.75497000  |
| H | -5.74821100 | 6.33856700  | 2.01981700  |
| H | -7.94942600 | 4.90925100  | 1.78343500  |
| H | -8.04672300 | 3.71043900  | 0.48939100  |
| H | -8.11999200 | 5.43255500  | 0.10529900  |
| H | -5.66286000 | -0.33345400 | 4.67533700  |
| H | -6.06282200 | -0.57811700 | 2.99431900  |
| H | -6.04923700 | -3.03769300 | 3.33188600  |
| H | -5.63183500 | -2.34559700 | 6.27371600  |
| H | -4.52556400 | -3.27195400 | 5.25073700  |
| H | -6.10366500 | -3.93306300 | 5.66068800  |
| H | -8.19361500 | -3.10269000 | 4.56784400  |
| H | -8.14633800 | -1.71689300 | 3.47461800  |
| H | -7.89032700 | -1.48526400 | 5.20809000  |
| H | -6.78485800 | -1.86763500 | -0.38664500 |
| H | -7.16326200 | -2.96126900 | -1.69362000 |
| H | -6.81193900 | -3.74754700 | 1.22616800  |
| H | -7.72987700 | -5.41485300 | -1.15779000 |
| H | -7.82511200 | -5.92091500 | 0.53142800  |
| H | -6.25321900 | -5.66249200 | -0.21806700 |
| H | -8.82476900 | -2.34464200 | 0.81610500  |

|   |             |             |             |
|---|-------------|-------------|-------------|
| H | -9.27311500 | -4.00283300 | 1.22891100  |
| H | -9.34705200 | -3.46030100 | -0.44995900 |
| H | -1.58966400 | -1.92712100 | 3.82849300  |
| H | -3.09282500 | -4.45474600 | -2.00031900 |
| H | -0.75854900 | 3.58009800  | -1.85907200 |
| H | -0.67032100 | 1.92375300  | 4.02311600  |
| H | -1.50322400 | -4.28426800 | 1.48390900  |
| H | -2.04257600 | -2.33407700 | -4.10461100 |
| H | -2.06600600 | 1.37609900  | -4.04062600 |
| H | -1.53752800 | 4.21005700  | 2.00374500  |
| N | 2.81008300  | -0.21957300 | -4.03673500 |
| C | 2.83290400  | 1.04930500  | -3.56206800 |
| C | 3.86503400  | 1.44933800  | -2.74423300 |
| C | 4.77050300  | 0.45105800  | -2.34214300 |
| C | 4.71716200  | -0.84556700 | -2.76755600 |
| C | 3.71538600  | -1.20870200 | -3.72120800 |
| C | 5.56166500  | -1.97167500 | -2.21850400 |
| C | 6.96803700  | -1.54466500 | -1.81433600 |
| C | 7.85686200  | -2.66875100 | -1.28870800 |
| C | 9.20017500  | -2.10536400 | -0.85020600 |
| C | 3.96087100  | 2.87914000  | -2.27194600 |
| C | 5.40652500  | 3.37494900  | -2.20174700 |
| C | 5.56397200  | 4.84959000  | -1.84053800 |
| C | 7.03997600  | 5.19341800  | -1.70746100 |
| O | 1.80683800  | 1.78920900  | -3.95005000 |
| O | 3.59598900  | -2.32683700 | -4.24695100 |
| C | 4.77800800  | -2.62118500 | -1.09667800 |
| C | 3.82661500  | -3.59389300 | -1.35722700 |
| N | 3.03501000  | -4.02880600 | -0.34180100 |
| C | 3.08486800  | -3.59997900 | 0.96046000  |
| C | 4.14909800  | -2.71597400 | 1.26859100  |
| C | 4.91115300  | -2.22901500 | 0.23523900  |
| O | 3.59934800  | -4.17409900 | -2.50504600 |
| O | 2.19888800  | -3.98323300 | 1.76575400  |
| C | 4.34474200  | -2.31627500 | 2.71012700  |
| C | 5.81601700  | -2.14654000 | 3.08692200  |
| C | 6.67744700  | -3.38998700 | 2.88178700  |
| C | 8.13225100  | -3.06550600 | 3.18599400  |

|   |            |             |             |
|---|------------|-------------|-------------|
| C | 3.51625200 | -1.10259000 | 3.05625000  |
| C | 2.21440800 | -1.24674200 | 3.50167400  |
| N | 1.50480600 | -0.13982700 | 3.83982700  |
| C | 1.92982800 | 1.15330100  | 3.67915200  |
| C | 3.23648400 | 1.32962800  | 3.15665900  |
| C | 3.97677200 | 0.20351600  | 2.88576400  |
| O | 1.55956000 | -2.37495000 | 3.61964900  |
| O | 1.12691200 | 2.08690900  | 3.96334700  |
| C | 3.69204100 | 2.73231200  | 2.81809500  |
| C | 5.20376200 | 2.92264000  | 2.89704800  |
| C | 5.68466900 | 4.33976200  | 2.59568400  |
| C | 7.20447000 | 4.38962200  | 2.63780700  |
| C | 3.11912000 | 3.11206800  | 1.46958900  |
| C | 1.88867200 | 3.72307800  | 1.37404900  |
| N | 1.32562000 | 3.93377500  | 0.16139100  |
| C | 1.87775400 | 3.56945300  | -1.03634800 |
| C | 3.21929600 | 3.10090200  | -0.97738600 |
| C | 3.76249900 | 2.84297800  | 0.25542500  |
| O | 1.15453100 | 4.13367600  | 2.38888700  |
| O | 1.17790300 | 3.63669400  | -2.08037500 |
| C | 8.03966700 | -3.78325900 | -2.30805900 |
| C | 6.19673200 | -4.56871300 | 3.71516300  |
| C | 5.07852600 | 5.36965700  | 3.53729000  |
| C | 4.87935200 | 5.76644200  | -2.84350900 |
| H | 5.65467400 | -2.70434000 | -3.02442300 |
| H | 3.95300800 | -3.13981300 | 3.31344700  |
| H | 3.24263400 | 3.39459400  | 3.56257400  |
| H | 3.45316300 | 3.49184400  | -3.02152100 |
| H | 5.55197900 | 0.73153600  | -1.64435400 |
| H | 4.76278000 | 2.42316900  | 0.29378000  |
| H | 4.98060600 | 0.33408300  | 2.49872200  |
| H | 5.68521000 | -1.50571300 | 0.47073500  |
| H | 7.44522000 | -1.09000300 | -2.69001900 |
| H | 6.92946200 | -0.75362300 | -1.05662200 |
| H | 7.37022700 | -3.10211200 | -0.40664700 |
| H | 8.46336200 | -3.39315500 | -3.23908000 |
| H | 7.09677300 | -4.27782900 | -2.54929900 |
| H | 8.72180600 | -4.54684500 | -1.92691000 |



|   |            |             |             |
|---|------------|-------------|-------------|
| H | 9.83404900 | -2.88387600 | -0.41928900 |
| H | 9.07800000 | -1.31952000 | -0.09911000 |
| H | 9.73686500 | -1.67172600 | -1.69989500 |
| H | 6.26507000 | -1.32284100 | 2.52146500  |
| H | 5.86496200 | -1.84557900 | 4.13994500  |
| H | 6.60987900 | -3.67670400 | 1.82588100  |
| H | 6.86179400 | -5.42620700 | 3.58961300  |
| H | 5.19267900 | -4.89202500 | 3.43287700  |
| H | 6.18209800 | -4.31233800 | 4.77954500  |
| H | 8.25581300 | -2.77045500 | 4.23285400  |
| H | 8.49668200 | -2.24441300 | 2.56243900  |
| H | 8.77497100 | -3.93063800 | 3.00732200  |
| H | 5.53113600 | 2.63599700  | 3.90301500  |
| H | 5.71491100 | 2.23772500  | 2.21183900  |
| H | 5.36909600 | 4.59369500  | 1.57637600  |
| H | 5.30343600 | 5.12371100  | 4.58016800  |
| H | 3.99356100 | 5.43549600  | 3.43266300  |
| H | 5.48625300 | 6.36287400  | 3.33571100  |
| H | 7.57426200 | 5.38194800  | 2.36981300  |
| H | 7.64716300 | 3.66919300  | 1.94414200  |
| H | 7.57491500 | 4.15613200  | 3.64089100  |
| H | 5.97812800 | 2.78260000  | -1.47928200 |
| H | 5.87472600 | 3.18903100  | -3.17506000 |
| H | 5.09268900 | 5.00997500  | -0.86330100 |
| H | 5.26998200 | 5.59904800  | -3.85245000 |
| H | 5.05362700 | 6.81470700  | -2.58997000 |
| H | 3.79838400 | 5.61372400  | -2.87284300 |
| H | 7.53022600 | 4.56367200  | -0.95974000 |
| H | 7.17732000 | 6.23545100  | -1.40921600 |
| H | 7.56148400 | 5.04871100  | -2.65876800 |
| H | 1.19698500 | 3.45317600  | 3.12698300  |
| H | 1.63863000 | 2.54860400  | -3.32758200 |
| H | 2.25583900 | -4.61880800 | -0.61338800 |
| H | 0.53444700 | -0.27513800 | 4.15492100  |
| H | 0.34221700 | 4.25663100  | 0.16830800  |
| H | 2.00392800 | -0.52158600 | -4.57388300 |
| H | 3.65977200 | -3.50499800 | -3.27260300 |
| H | 1.88938800 | -3.07868800 | 2.94023500  |

|   |             |             |             |
|---|-------------|-------------|-------------|
| C | 0.63845300  | -1.38343500 | 0.42004000  |
| H | 0.13053500  | -1.75547000 | 1.30831400  |
| H | 0.67199100  | -2.14440500 | -0.36371800 |
| H | 1.64479800  | -1.05369600 | 0.67665000  |
| C | 0.58210200  | 0.31101800  | -1.31434000 |
| H | 0.61700100  | -0.49010600 | -2.05792900 |
| H | 0.02945600  | 1.16571900  | -1.69616900 |
| H | 1.58751500  | 0.61203800  | -1.02194400 |
| C | -0.18099800 | 0.83177800  | 0.92345000  |
| H | -0.76847900 | 1.66834200  | 0.55275400  |
| H | -0.64821000 | 0.40894500  | 1.80716700  |
| H | 0.82998500  | 1.15985100  | 1.15798800  |
| C | -1.48931100 | -0.64533600 | -0.48533500 |
| H | -1.39503700 | -1.43998700 | -1.22967900 |
| H | -1.99903300 | -1.00161200 | 0.40882900  |
| H | -2.02394800 | 0.20967100  | -0.89668100 |
| N | -0.11435000 | -0.21596500 | -0.11203000 |
| I | 0.29187000  | -3.00755300 | -2.94998100 |

[1<sub>2</sub>+Me<sub>4</sub>N<sub>endo</sub>+I<sub>exo</sub>]

Energy = -5261.80193992 hartree

Number of imaginary frequencies (PBE0-D3/def2-SVP) = 0

XYZ

|   |            |             |            |
|---|------------|-------------|------------|
| N | 1.13547800 | -0.93820700 | 3.94882300 |
| C | 1.69875600 | -2.02239000 | 3.36122300 |
| C | 2.86509700 | -1.88157900 | 2.63867800 |
| C | 3.41988600 | -0.59315000 | 2.59697500 |
| C | 2.83945400 | 0.51290200  | 3.18231100 |
| C | 1.59574900 | 0.34563300  | 3.84337200 |
| C | 3.40711500 | 1.91446200  | 3.07669500 |
| C | 4.93287400 | 1.93951100  | 3.10203500 |
| C | 5.55267500 | 3.33161900  | 3.03622900 |
| C | 7.06864900 | 3.20655600  | 3.01047400 |
| C | 3.44357000 | -3.07658300 | 1.90787100 |
| C | 4.97001700 | -3.08989500 | 1.92530900 |
| C | 5.61543200 | -4.29371900 | 1.24646700 |
| C | 7.12894800 | -4.15084600 | 1.30556000 |

|   |            |             |             |
|---|------------|-------------|-------------|
| O | 1.01940700 | -3.13538700 | 3.54436800  |
| O | 0.85985600 | 1.27090400  | 4.29844300  |
| C | 2.81788000 | 2.63134600  | 1.87916500  |
| C | 1.65812700 | 3.36417200  | 2.01998900  |
| N | 1.10200900 | 3.95742500  | 0.93457600  |
| C | 1.57836800 | 3.87266300  | -0.34584900 |
| C | 2.80811500 | 3.18635800  | -0.51214200 |
| C | 3.37364700 | 2.58389000  | 0.59145200  |
| O | 0.98526300 | 3.55469800  | 3.13457300  |
| O | 0.86724900 | 4.36839800  | -1.26895800 |
| C | 3.39965000 | 3.09372700  | -1.90508700 |
| C | 4.92534800 | 3.13025900  | -1.92446900 |
| C | 5.55228000 | 4.34501900  | -1.24788000 |
| C | 7.06779900 | 4.22515000  | -1.30631000 |
| C | 2.83590800 | 1.88926900  | -2.63099900 |
| C | 1.64699200 | 2.00940400  | -3.32085400 |
| N | 1.08655200 | 0.91441700  | -3.89093000 |
| C | 1.58060000 | -0.35957700 | -3.81524300 |
| C | 2.83777800 | -0.50695600 | -3.17592100 |
| C | 3.41492500 | 0.61127900  | -2.60625800 |
| O | 0.93946100 | 3.10592100  | -3.48342000 |
| O | 0.85806900 | -1.29439700 | -4.27263600 |
| C | 3.42503000 | -1.90100200 | -3.07720000 |
| C | 4.95082900 | -1.90615200 | -3.10953900 |
| C | 5.58886300 | -3.29026700 | -3.05054500 |
| C | 7.10320300 | -3.14549900 | -3.03248800 |
| C | 2.85125900 | -2.63070100 | -1.87910500 |
| C | 1.71069700 | -3.39213900 | -2.01738900 |
| N | 1.16967600 | -3.99826700 | -0.93135100 |
| C | 1.63154000 | -3.88071000 | 0.35235400  |
| C | 2.85426500 | -3.18028600 | 0.51447400  |
| C | 3.40814600 | -2.57140000 | -0.59285700 |
| O | 1.03321000 | -3.59378700 | -3.12873400 |
| O | 0.91534800 | -4.35874500 | 1.28041900  |
| C | 5.08970200 | 4.23703300  | 4.16778300  |
| C | 5.07654200 | 5.66168700  | -1.84315700 |
| C | 5.13165300 | -4.19893200 | -4.18182800 |
| C | 5.15990800 | -5.61856700 | 1.83938300  |

|   |            |             |             |
|---|------------|-------------|-------------|
| H | 3.05692400 | 2.44846700  | 3.96476400  |
| H | 3.04507600 | 3.97582300  | -2.44625900 |
| H | 3.07801600 | -2.43642100 | -3.96567700 |
| H | 3.10356900 | -3.96481300 | 2.44817400  |
| H | 4.34399100 | -0.45499200 | 2.03760200  |
| H | 4.31839600 | -1.98567500 | -0.45775500 |
| H | 4.35270000 | 0.48833300  | -2.06657400 |
| H | 4.29376100 | 2.01458200  | 0.45419600  |
| H | 5.25763200 | 1.44593600  | 4.02567300  |
| H | 5.34422100 | 1.34542900  | 2.28055700  |
| H | 5.24470300 | 3.79396400  | 2.09013400  |
| H | 5.32135900 | 3.79053900  | 5.14057900  |
| H | 4.01394300 | 4.42793800  | 4.13407800  |
| H | 5.59397900 | 5.20539600  | 4.12007000  |
| H | 7.54274000 | 4.18398500  | 2.88985300  |
| H | 7.39269400 | 2.56155600  | 2.19015000  |
| H | 7.43644800 | 2.77044000  | 3.94494800  |
| H | 5.34038100 | 2.23050200  | -1.46042000 |
| H | 5.24223700 | 3.10394800  | -2.97403000 |
| H | 5.26161400 | 4.33064700  | -0.19048700 |
| H | 5.58660700 | 6.50609900  | -1.37297200 |
| H | 4.00238300 | 5.81442000  | -1.70964300 |
| H | 5.29021800 | 5.70155200  | -2.91655200 |
| H | 7.41879200 | 4.25821100  | -2.34287800 |
| H | 7.40087500 | 3.28026800  | -0.87019100 |
| H | 7.54900800 | 5.04401300  | -0.76543600 |
| H | 5.26535200 | -1.40573900 | -4.03310100 |
| H | 5.35812100 | -1.30964100 | -2.28778500 |
| H | 5.29191200 | -3.75866600 | -2.10388700 |
| H | 5.35152600 | -3.74681700 | -5.15476800 |
| H | 4.05882600 | -4.40468300 | -4.14237400 |
| H | 5.64935600 | -5.16043500 | -4.13964100 |
| H | 7.59058600 | -4.11696400 | -2.91687200 |
| H | 7.42317500 | -2.49839400 | -2.21222400 |
| H | 7.46036900 | -2.70231300 | -3.96776100 |
| H | 5.37049200 | -2.18304400 | 1.46226600  |
| H | 5.28715700 | -3.06006300 | 2.97465100  |
| H | 5.32505200 | -4.28199100 | 0.18894200  |

|   |             |             |             |
|---|-------------|-------------|-------------|
| H | 5.37370500  | -5.65683500 | 2.91280000  |
| H | 5.68311800  | -6.45424900 | 1.36804200  |
| H | 4.08828300  | -5.78777800 | 1.70528200  |
| H | 7.44762800  | -3.20035900 | 0.87087300  |
| H | 7.62274300  | -4.96148800 | 0.76363200  |
| H | 7.48003700  | -4.18011000 | 2.34220900  |
| H | 1.04970900  | -2.75970000 | -3.69730200 |
| H | 1.07281800  | -3.72264500 | 2.72492300  |
| H | 0.18908500  | 4.40017600  | 1.06934500  |
| H | 0.15749100  | 1.04138000  | -4.30566500 |
| H | 0.25976400  | -4.44590000 | -1.06604100 |
| H | 0.21710700  | -1.07301700 | 4.37898500  |
| H | 1.02044500  | 2.72115900  | 3.70643700  |
| H | 1.00877100  | 3.70910700  | -2.67026800 |
| N | -1.99666200 | 0.98651500  | 3.97444100  |
| C | -2.53404400 | 2.05629500  | 3.33934400  |
| C | -3.69613000 | 1.90756200  | 2.60537500  |
| C | -4.25123600 | 0.62395700  | 2.58038000  |
| C | -3.70345700 | -0.46967500 | 3.20747400  |
| C | -2.47585900 | -0.29573000 | 3.90471400  |
| C | -4.26655900 | -1.86914900 | 3.09585100  |
| C | -5.79325200 | -1.89970600 | 3.08237100  |
| C | -6.40706800 | -3.29708100 | 3.05710400  |
| C | -7.92221400 | -3.19312100 | 2.96996600  |
| C | -4.27789000 | 3.08509900  | 1.85469300  |
| C | -5.80572700 | 3.08741000  | 1.85442900  |
| C | -6.44892400 | 4.31235400  | 1.20913900  |
| C | -7.96224700 | 4.15696400  | 1.20586500  |
| O | -1.85289100 | 3.16673600  | 3.49184400  |
| O | -1.78323500 | -1.21987400 | 4.40506500  |
| C | -3.65194100 | -2.58767700 | 1.91347600  |
| C | -2.48035400 | -3.30546500 | 2.05537000  |
| N | -1.91910100 | -3.90141400 | 0.97461700  |
| C | -2.41588200 | -3.85303500 | -0.30211600 |
| C | -3.65267800 | -3.17232700 | -0.46800800 |
| C | -4.20093700 | -2.55186200 | 0.62812900  |
| O | -1.81116200 | -3.47496500 | 3.17043200  |
| O | -1.73625300 | -4.36356300 | -1.23031600 |

|   |             |             |             |
|---|-------------|-------------|-------------|
| C | -4.26124900 | -3.10711900 | -1.85269400 |
| C | -5.78822100 | -3.13043500 | -1.84078600 |
| C | -6.40908500 | -4.35899600 | -1.18066600 |
| C | -7.92422900 | -4.22379700 | -1.16375800 |
| C | -3.69831400 | -1.92798800 | -2.61568400 |
| C | -2.53550200 | -2.06313400 | -3.34966100 |
| N | -1.98868000 | -0.97842900 | -3.95116300 |
| C | -2.46389700 | 0.30279100  | -3.85319000 |
| C | -3.70173800 | 0.46191700  | -3.16919600 |
| C | -4.25348000 | -0.64345600 | -2.56800600 |
| O | -1.84642600 | -3.16836000 | -3.51376800 |
| O | -1.77232000 | 1.23781800  | -4.33361600 |
| C | -4.29042700 | 1.85318600  | -3.08375000 |
| C | -5.81772900 | 1.85488200  | -3.07122800 |
| C | -6.45682200 | 3.24102600  | -3.06549600 |
| C | -7.97005300 | 3.11064600  | -2.98056000 |
| C | -3.69468500 | 2.60968400  | -1.91754700 |
| C | -2.55576300 | 3.37463600  | -2.07336100 |
| N | -2.00676100 | 3.99184300  | -0.99710300 |
| C | -2.47145100 | 3.89694200  | 0.28994800  |
| C | -3.68650900 | 3.17968500  | 0.46584200  |
| C | -4.22964400 | 2.55188600  | -0.62676300 |
| O | -1.90225000 | 3.56053700  | -3.19642500 |
| O | -1.78494500 | 4.39896800  | 1.21659900  |
| C | -5.98577500 | -4.13442200 | 4.25551500  |
| C | -5.98552200 | -5.65408700 | -1.85766400 |
| C | -6.04732300 | 4.07071100  | -4.27329600 |
| C | -6.03582000 | 5.60816200  | 1.89117700  |
| H | -3.94337500 | -2.39761400 | 3.99666800  |
| H | -3.93133500 | -4.00650200 | -2.37912000 |
| H | -3.97658700 | 2.36845400  | -3.99549000 |
| H | -3.95768800 | 3.98353900  | 2.38906300  |
| H | -5.17003800 | 0.48321100  | 2.02199400  |
| H | -5.13822300 | 1.97582600  | -0.48408300 |
| H | -5.17853300 | -0.51606800 | -2.01692600 |
| H | -5.13213900 | -2.01085000 | 0.49359200  |
| H | -6.14798200 | -1.36707500 | 3.97190900  |
| H | -6.18332400 | -1.33771600 | 2.22654200  |

|   |             |             |             |
|---|-------------|-------------|-------------|
| H | -6.05318400 | -3.80696100 | 2.15290300  |
| H | -6.25399200 | -3.63575900 | 5.19239800  |
| H | -4.91033900 | -4.32336000 | 4.27052100  |
| H | -6.48592200 | -5.10532300 | 4.24195000  |
| H | -8.38181700 | -4.18129900 | 2.89733600  |
| H | -8.23377900 | -2.61478300 | 2.09564600  |
| H | -8.33089000 | -2.70096200 | 3.85790300  |
| H | -6.18402200 | -2.23709500 | -1.34505400 |
| H | -6.13272500 | -3.06921200 | -2.87942200 |
| H | -6.06373300 | -4.39666900 | -0.14070700 |
| H | -6.48977900 | -6.50932700 | -1.40238300 |
| H | -4.91082000 | -5.83091100 | -1.77837000 |
| H | -6.24750400 | -5.64138100 | -2.92048300 |
| H | -8.32434400 | -4.19230500 | -2.18191700 |
| H | -8.23838200 | -3.30868300 | -0.65402300 |
| H | -8.38975200 | -5.06809100 | -0.65047000 |
| H | -6.16273900 | 1.30265700  | -3.95262800 |
| H | -6.19739500 | 1.29903700  | -2.20681700 |
| H | -6.11464400 | 3.76826700  | -2.16662800 |
| H | -6.30373900 | 3.55541400  | -5.20448000 |
| H | -4.97544200 | 4.27906900  | -4.28781100 |
| H | -6.56517300 | 5.03237500  | -4.27345800 |
| H | -8.44760600 | 4.09122100  | -2.92226100 |
| H | -8.27326200 | 2.53848500  | -2.09924400 |
| H | -8.36752800 | 2.59938700  | -3.86277100 |
| H | -6.19266700 | 2.19288000  | 1.35398900  |
| H | -6.14147700 | 3.01258000  | 2.89501200  |
| H | -6.11454600 | 4.36167000  | 0.16603100  |
| H | -6.28697500 | 5.58453600  | 2.95641800  |
| H | -6.55581200 | 6.45982400  | 1.44704400  |
| H | -4.96435200 | 5.79983400  | 1.80266400  |
| H | -8.26902500 | 3.24173700  | 0.69179900  |
| H | -8.44393000 | 4.99898700  | 0.70389300  |
| H | -8.35203000 | 4.11202900  | 2.22751200  |
| H | -1.91904500 | 2.71960900  | -3.75342800 |
| H | -1.90425500 | 3.74485900  | 2.66672800  |
| H | -0.97974300 | -4.30751400 | 1.10632700  |
| H | -1.04513100 | -1.10614300 | -4.34618800 |

|   |             |             |             |
|---|-------------|-------------|-------------|
| H | -1.07334000 | 4.40611100  | -1.13011300 |
| H | -1.05440000 | 1.11444400  | 4.37163800  |
| H | -1.87924700 | -2.65660800 | 3.76054700  |
| H | -1.88038100 | -3.74427800 | -2.68441500 |
| C | -0.63559000 | -1.12383300 | -0.97767000 |
| H | -0.17539600 | -0.95591400 | -1.94758200 |
| H | -0.29743400 | -2.07283100 | -0.57508300 |
| H | -1.72058400 | -1.11852200 | -1.06137200 |
| C | -0.80514300 | -0.29910800 | 1.28079300  |
| H | -0.45231300 | -1.26288400 | 1.64068400  |
| H | -0.47398300 | 0.48935500  | 1.95140500  |
| H | -1.89075600 | -0.30056100 | 1.20473100  |
| C | -0.71864000 | 1.25198200  | -0.55775500 |
| H | -0.41063700 | 2.02614700  | 0.13929400  |
| H | -0.28598900 | 1.44162400  | -1.53721700 |
| H | -1.80402500 | 1.21173300  | -0.62691800 |
| C | 1.25051800  | -0.01200800 | 0.05463100  |
| H | 1.59641400  | -0.96919400 | 0.43496800  |
| H | 1.67453400  | 0.17258200  | -0.92820500 |
| H | 1.53154900  | 0.78312600  | 0.73949600  |
| N | -0.22567100 | -0.04701500 | -0.05455100 |
| I | 6.41189000  | 0.02672600  | -0.00832200 |

[1<sub>2</sub>+Me<sub>4</sub>N<sub>endo</sub>+2I<sub>exo</sub>]<sup>-</sup>

Energy = -5559.697982 hartree

Number of imaginary frequencies (PBE0-D3/def2-SVP) = 0

XYZ

|   |            |             |            |
|---|------------|-------------|------------|
| N | 1.54477600 | -0.95008100 | 3.93044300 |
| C | 2.10889900 | -2.03228100 | 3.34033300 |
| C | 3.28170800 | -1.89254800 | 2.62594900 |
| C | 3.83999400 | -0.60648500 | 2.58827600 |
| C | 3.26500600 | 0.49571600  | 3.18336000 |
| C | 2.02074900 | 0.33010700  | 3.84623700 |
| C | 3.83338400 | 1.89642500  | 3.08430800 |
| C | 5.35922400 | 1.91942600  | 3.10450200 |
| C | 5.98152700 | 3.31048300  | 3.04243100 |
| C | 7.49730500 | 3.18416600  | 3.01089300 |



|   |            |             |             |
|---|------------|-------------|-------------|
| C | 3.86139800 | -3.08486800 | 1.89247500  |
| C | 5.38777100 | -3.09634200 | 1.91099900  |
| C | 6.03525800 | -4.29776800 | 1.23005300  |
| C | 7.54869100 | -4.15333400 | 1.28788800  |
| O | 1.43047300 | -3.14593600 | 3.51528100  |
| O | 1.30472500 | 1.25747400  | 4.32266300  |
| C | 3.24134700 | 2.61801300  | 1.89152400  |
| C | 2.07962600 | 3.34906700  | 2.03483000  |
| N | 1.52146300 | 3.94614100  | 0.95262200  |
| C | 2.00636700 | 3.87461100  | -0.32581000 |
| C | 3.23436200 | 3.18322500  | -0.49408900 |
| C | 3.79557300 | 2.56997700  | 0.60410200  |
| O | 1.41227300 | 3.53481200  | 3.15265200  |
| O | 1.31127800 | 4.38683400  | -1.24941700 |
| C | 3.82323100 | 3.09534900  | -1.88738000 |
| C | 5.34906600 | 3.12604000  | -1.90803000 |
| C | 5.98153100 | 4.33603700  | -1.22824000 |
| C | 7.49664500 | 4.21086400  | -1.28653800 |
| C | 3.25568800 | 1.89590700  | -2.61746100 |
| C | 2.06456300 | 2.01911800  | -3.30497700 |
| N | 1.50327400 | 0.92855900  | -3.88230800 |
| C | 2.00711100 | -0.34303300 | -3.82429100 |
| C | 3.26114900 | -0.49348600 | -3.17700900 |
| C | 3.83349600 | 0.61834800  | -2.59378400 |
| O | 1.36188400 | 3.11887900  | -3.46037500 |
| O | 1.30211200 | -1.27700700 | -4.30482000 |
| C | 3.84551900 | -1.88805100 | -3.08274500 |
| C | 5.37140400 | -1.89460800 | -3.11035900 |
| C | 6.00894500 | -3.27898500 | -3.05417100 |
| C | 7.52341100 | -3.13618600 | -3.03037900 |
| C | 3.26747400 | -2.61952500 | -1.88844600 |
| C | 2.11836300 | -3.36982400 | -2.02800500 |
| N | 1.57364800 | -3.97804700 | -0.94529300 |
| C | 2.05013700 | -3.88347800 | 0.33539000  |
| C | 3.27373500 | -3.18259700 | 0.49886800  |
| C | 3.82510200 | -2.56483200 | -0.60331000 |
| O | 1.44282100 | -3.56036700 | -3.14116400 |
| O | 1.35179900 | -4.38202600 | 1.26360700  |

|   |            |             |             |
|---|------------|-------------|-------------|
| C | 5.52319100 | 4.21225900  | 4.17879600  |
| C | 5.51078500 | 5.65658100  | -1.81897400 |
| C | 5.55438500 | -4.18366400 | -4.18973100 |
| C | 5.58182400 | -5.62453800 | 1.82037000  |
| H | 3.48496400 | 2.42559800  | 3.97591700  |
| H | 3.46987700 | 3.98045000  | -2.42433800 |
| H | 3.49880400 | -2.41912800 | -3.97392500 |
| H | 3.52014000 | -3.97460700 | 2.42944400  |
| H | 4.76451200 | -0.46842300 | 2.03048800  |
| H | 4.73619800 | -1.98174400 | -0.46633800 |
| H | 4.76855300 | 0.49233300  | -2.05094900 |
| H | 4.71343100 | 1.99840800  | 0.46447200  |
| H | 5.68715500 | 1.42084500  | 4.02459400  |
| H | 5.76839700 | 1.32863400  | 2.27947300  |
| H | 5.67005800 | 3.77669600  | 2.09966700  |
| H | 5.75704400 | 3.76119000  | 5.14920600  |
| H | 4.44749800 | 4.40262300  | 4.14832900  |
| H | 6.02817200 | 5.18077600  | 4.13314400  |
| H | 7.97240000 | 4.16167400  | 2.89106000  |
| H | 7.81694900 | 2.54024200  | 2.18784500  |
| H | 7.86762100 | 2.74469800  | 3.94316500  |
| H | 5.76241300 | 2.22416500  | -1.44644800 |
| H | 5.66611200 | 3.10069000  | -2.95779600 |
| H | 5.68978800 | 4.31930100  | -0.17140100 |
| H | 6.02393300 | 6.49790900  | -1.34575500 |
| H | 4.43720200 | 5.81107200  | -1.68504000 |
| H | 5.72425300 | 5.69865100  | -2.89255200 |
| H | 7.84773400 | 4.24696200  | -2.32330300 |
| H | 7.82516000 | 3.26215600  | -0.85500800 |
| H | 7.98117600 | 5.02564600  | -0.74163600 |
| H | 5.68987300 | -1.39065700 | -4.03089600 |
| H | 5.77811200 | -1.30154400 | -2.28572600 |
| H | 5.70756400 | -3.75013200 | -2.11057300 |
| H | 5.77745800 | -3.72807400 | -5.16056800 |
| H | 4.48114000 | -4.38645600 | -4.15343600 |
| H | 6.07063900 | -5.14643000 | -4.14894500 |
| H | 8.00971700 | -4.10871400 | -2.91517500 |
| H | 7.84034600 | -2.49058500 | -2.20759900 |

|   |             |             |             |
|---|-------------|-------------|-------------|
| H | 7.88402800  | -2.69074100 | -3.96361700 |
| H | 5.78886400  | -2.18894400 | 1.44941700  |
| H | 5.70542600  | -3.06724800 | 2.96043600  |
| H | 5.74308000  | -4.28430100 | 0.17325700  |
| H | 5.79618300  | -5.66425400 | 2.89384800  |
| H | 6.10556200  | -6.45901300 | 1.34661000  |
| H | 4.51026300  | -5.79285100 | 1.68687600  |
| H | 7.86492600  | -3.20047900 | 0.85632500  |
| H | 8.04339700  | -4.96183500 | 0.74275600  |
| H | 7.90047100  | -4.18510200 | 2.32456100  |
| H | 1.46286000  | -2.72272000 | -3.70843000 |
| H | 1.48306300  | -3.73137000 | 2.69248300  |
| H | 0.59331700  | 4.36661600  | 1.08352800  |
| H | 0.56058300  | 1.05297900  | -4.27764500 |
| H | 0.64631300  | -4.39930300 | -1.07637500 |
| H | 0.61156000  | -1.08016900 | 4.33917900  |
| H | 1.44365400  | 2.69639200  | 3.72033900  |
| H | 1.42984300  | 3.71761300  | -2.64268900 |
| N | -1.57827400 | 0.97381600  | 3.99150000  |
| C | -2.11642300 | 2.04490800  | 3.35820300  |
| C | -3.27109500 | 1.89692400  | 2.61803400  |
| C | -3.82951600 | 0.61178400  | 2.58048200  |
| C | -3.27581600 | -0.48129300 | 3.21115000  |
| C | -2.05137700 | -0.30912500 | 3.90849000  |
| C | -3.83951100 | -1.88122300 | 3.09743000  |
| C | -5.36561300 | -1.90742200 | 3.11486700  |
| C | -5.98471700 | -3.29930800 | 3.04142200  |
| C | -7.50072800 | -3.17644000 | 3.00850000  |
| C | -3.84589900 | 3.08361800  | 1.87597900  |
| C | -5.37295000 | 3.09910800  | 1.89948400  |
| C | -6.01971200 | 4.29791900  | 1.21332900  |
| C | -7.53330500 | 4.15868100  | 1.27911700  |
| O | -1.43273100 | 3.15857200  | 3.51938300  |
| O | -1.34286400 | -1.23342700 | 4.40090500  |
| C | -3.24169300 | -2.58655800 | 1.89854300  |
| C | -2.07720700 | -3.31063200 | 2.03889800  |
| N | -1.51300400 | -3.90115600 | 0.95654300  |
| C | -2.00280100 | -3.83714300 | -0.32075500 |

|   |             |             |             |
|---|-------------|-------------|-------------|
| C | -3.23635000 | -3.15541700 | -0.48537300 |
| C | -3.79337200 | -2.53334400 | 0.61076900  |
| O | -1.40526700 | -3.49196900 | 3.15656500  |
| O | -1.30631600 | -4.33925100 | -1.24907000 |
| C | -3.83724000 | -3.09639700 | -1.87435600 |
| C | -5.36351800 | -3.12975200 | -1.88312600 |
| C | -5.98886000 | -4.33039200 | -1.18053300 |
| C | -7.50458300 | -4.20793600 | -1.22722900 |
| C | -3.27992800 | -1.91096100 | -2.63168800 |
| C | -2.12811400 | -2.04986700 | -3.37652400 |
| N | -1.57687300 | -0.96523800 | -3.97558700 |
| C | -2.03853100 | 0.31861100  | -3.85848200 |
| C | -3.27107400 | 0.48059500  | -3.17150900 |
| C | -3.83196200 | -0.62246600 | -2.56670600 |
| O | -1.44180300 | -3.16140000 | -3.55175300 |
| O | -1.32778500 | 1.25162200  | -4.32984600 |
| C | -3.85719600 | 1.87384900  | -3.08563700 |
| C | -5.38381100 | 1.87368900  | -3.10746500 |
| C | -6.02547300 | 3.25629200  | -3.05647400 |
| C | -7.53944900 | 3.10931300  | -3.02861700 |
| C | -3.27941400 | 2.61791900  | -1.90293100 |
| C | -2.14569800 | 3.38597300  | -2.05697200 |
| N | -1.59440700 | 3.99974200  | -0.97993000 |
| C | -2.05145900 | 3.88965800  | 0.30707800  |
| C | -3.26475800 | 3.17383000  | 0.48207700  |
| C | -3.81899900 | 2.54639600  | -0.61051800 |
| O | -1.48659200 | 3.57826500  | -3.18183000 |
| O | -1.34594700 | 4.38143900  | 1.23286400  |
| C | -5.52609300 | -4.20870800 | 4.17160200  |
| C | -5.52199800 | -5.65885900 | -1.75651300 |
| C | -5.57608200 | 4.15708700  | -4.19723800 |
| C | -5.55933600 | 5.62735200  | 1.79223500  |
| H | -3.49305300 | -2.41872900 | 3.98457500  |
| H | -3.48715000 | -3.99154600 | -2.39579100 |
| H | -3.51737400 | 2.39686800  | -3.98398300 |
| H | -3.50258400 | 3.97630500  | 2.40652900  |
| H | -4.73757700 | 0.46628800  | 1.99781800  |
| H | -4.72023400 | 1.95057700  | -0.46419000 |

|   |             |             |             |
|---|-------------|-------------|-------------|
| H | -4.74359300 | -0.48695800 | -1.98723000 |
| H | -4.71449100 | -1.96705500 | 0.47167000  |
| H | -5.69555200 | -1.41684300 | 4.03855600  |
| H | -5.77508700 | -1.31081100 | 2.29415800  |
| H | -5.67049000 | -3.75758700 | 2.09582200  |
| H | -5.76126400 | -3.76509600 | 5.14514100  |
| H | -4.45015300 | -4.39756700 | 4.14056200  |
| H | -6.02983400 | -5.17750900 | 4.11839800  |
| H | -7.97320300 | -4.15407000 | 2.87938000  |
| H | -7.82050600 | -2.52616400 | 2.19052500  |
| H | -7.87355200 | -2.74600600 | 3.94401400  |
| H | -5.77534000 | -2.22116000 | -1.43340100 |
| H | -5.68753000 | -3.12150400 | -2.93104500 |
| H | -5.68773300 | -4.29850900 | -0.12678700 |
| H | -6.03062200 | -6.49372900 | -1.26718900 |
| H | -4.44724900 | -5.81089100 | -1.62933700 |
| H | -5.74433200 | -5.71618300 | -2.82759100 |
| H | -7.86466000 | -4.25982100 | -2.26026300 |
| H | -7.83053000 | -3.25336300 | -0.80687700 |
| H | -7.98317300 | -5.01520700 | -0.66606900 |
| H | -5.70369200 | 1.36316600  | -4.02386800 |
| H | -5.78547200 | 1.28382900  | -2.27812200 |
| H | -5.72318600 | 3.73234600  | -2.11558600 |
| H | -5.79978600 | 3.69615200  | -5.16543000 |
| H | -4.50340800 | 4.36352700  | -4.16427500 |
| H | -6.09546300 | 5.11833700  | -4.15995400 |
| H | -8.02816100 | 4.08105500  | -2.91670000 |
| H | -7.85260400 | 2.46646900  | -2.20224300 |
| H | -7.90082100 | 2.65872700  | -3.95911300 |
| H | -5.77836500 | 2.18988100  | 1.44537300  |
| H | -5.68683000 | 3.07760600  | 2.95026100  |
| H | -5.73254000 | 4.27599300  | 0.15533100  |
| H | -5.76813100 | 5.67508300  | 2.86650000  |
| H | -6.08307200 | 6.46009600  | 1.31539800  |
| H | -4.48795200 | 5.79168300  | 1.65227000  |
| H | -7.85427900 | 3.20366200  | 0.85589400  |
| H | -8.02791400 | 4.96481800  | 0.73035400  |
| H | -7.88022600 | 4.19907700  | 2.31714300  |

|   |             |             |             |
|---|-------------|-------------|-------------|
| H | -1.49611000 | 2.73516400  | -3.73448100 |
| H | -1.47934200 | 3.72872300  | 2.68899200  |
| H | -0.58497500 | -4.32006800 | 1.09051100  |
| H | -0.64402300 | -1.09651100 | -4.38247600 |
| H | -0.67010500 | 4.42310400  | -1.11436400 |
| H | -0.64495100 | 1.10335000  | 4.39794300  |
| H | -1.46332400 | -2.67123800 | 3.74348800  |
| H | -1.46713500 | -3.72603300 | -2.71539500 |
| C | -0.27654800 | -1.09508600 | -1.00818500 |
| H | 0.19259300  | -0.90881400 | -1.97009100 |
| H | 0.04712900  | -2.05605300 | -0.62268200 |
| H | -1.36041700 | -1.07823800 | -1.10154000 |
| C | -0.46094000 | -0.31595900 | 1.26468000  |
| H | -0.11524100 | -1.28687200 | 1.61191000  |
| H | -0.13838300 | 0.46148900  | 1.95174200  |
| H | -1.54537100 | -0.31405500 | 1.17675300  |
| C | -0.34617500 | 1.27047800  | -0.54043400 |
| H | -0.04066100 | 2.02819300  | 0.17534600  |
| H | 0.09365300  | 1.47562100  | -1.51354200 |
| H | -1.43108700 | 1.23867900  | -0.61838500 |
| C | 1.60910700  | -0.01919800 | 0.06225700  |
| H | 1.94701900  | -0.98597200 | 0.42561200  |
| H | 2.04349600  | 0.18289000  | -0.91285900 |
| H | 1.89177500  | 0.75976400  | 0.76521700  |
| N | 0.13518900  | -0.04144100 | -0.05937300 |
| I | 6.92045300  | 0.02060800  | -0.00765900 |
| I | -6.95235800 | -0.01477200 | 0.00653900  |

[1<sub>2</sub>+I<sub>exo</sub>]

Energy = -5047.69155803 hartree

Number of imaginary frequencies (PBE0-D3/def2-SVP) = 0

XYZ

|   |            |             |             |
|---|------------|-------------|-------------|
| N | 1.05782700 | 0.93671500  | -3.91660800 |
| C | 1.61871000 | 2.02022900  | -3.33115700 |
| C | 2.79035800 | 1.88501100  | -2.61893300 |
| C | 3.34591600 | 0.60116000  | -2.56886600 |
| C | 2.77954100 | -0.50021700 | -3.17313500 |

|   |            |             |             |
|---|------------|-------------|-------------|
| C | 1.53902100 | -0.33936900 | -3.83782300 |
| C | 3.36226000 | -1.89225100 | -3.07465500 |
| C | 4.88843400 | -1.90093400 | -3.09549100 |
| C | 5.52331200 | -3.28624100 | -3.03204300 |
| C | 7.03811900 | -3.14787700 | -3.00467700 |
| C | 3.36163900 | 3.07965100  | -1.89041400 |
| C | 4.88813200 | 3.09963500  | -1.90304200 |
| C | 5.52662900 | 4.30352000  | -1.21813000 |
| C | 7.04117700 | 4.16884700  | -1.26919800 |
| O | 0.94458800 | 3.13776500  | -3.51647400 |
| O | 0.83213500 | -1.26878000 | -4.33597600 |
| C | 2.77594700 | -2.60895300 | -1.88011800 |
| C | 1.62242400 | -3.34749600 | -2.02310300 |
| N | 1.06381600 | -3.94028700 | -0.94195500 |
| C | 1.54096800 | -3.85824400 | 0.33560000  |
| C | 2.76555800 | -3.16655700 | 0.50293900  |
| C | 3.32013700 | -2.54234200 | -0.59248100 |
| O | 0.96747900 | -3.55181700 | -3.14925700 |
| O | 0.84558000 | -4.37746600 | 1.26208500  |
| C | 3.36160400 | -3.07965100 | 1.89047800  |
| C | 4.88809600 | -3.09963300 | 1.90313700  |
| C | 5.52661000 | -4.30351600 | 1.21823800  |
| C | 7.04115700 | -4.16884000 | 1.26933600  |
| C | 2.79030500 | -1.88501200 | 2.61898400  |
| C | 1.61864400 | -2.02023100 | 3.33118500  |
| N | 1.05774800 | -0.93671800 | 3.91662600  |
| C | 1.53894400 | 0.33936600  | 3.83785300  |
| C | 2.77947500 | 0.50021700  | 3.17318700  |
| C | 3.34586300 | -0.60115900 | 2.56892900  |
| O | 0.94451900 | -3.13776800 | 3.51648900  |
| O | 0.83204700 | 1.26877500  | 4.33599400  |
| C | 3.36219400 | 1.89225200  | 3.07471900  |
| C | 4.88836700 | 1.90093700  | 3.09558700  |
| C | 5.52324500 | 3.28624500  | 3.03215300  |
| C | 7.03805200 | 3.14788400  | 3.00481700  |
| C | 2.77590500 | 2.60895300  | 1.88016900  |
| C | 1.62238000 | 3.34749700  | 2.02313100  |
| N | 1.06379100 | 3.94028300  | 0.94196900  |

|   |            |             |             |
|---|------------|-------------|-------------|
| C | 1.54096700 | 3.85823500  | -0.33557600 |
| C | 2.76556300 | 3.16655400  | -0.50288900 |
| C | 3.32012100 | 2.54234200  | 0.59254400  |
| O | 0.96741500 | 3.55182500  | 3.14927200  |
| O | 0.84559700 | 4.37745500  | -1.26207600 |
| C | 5.06981800 | -4.19538500 | -4.16464300 |
| C | 5.06761400 | -5.62877600 | 1.80795600  |
| C | 5.06972700 | 4.19538700  | 4.16474400  |
| C | 5.06764300 | 5.62877900  | -1.80785700 |
| H | 3.01896300 | -2.42761100 | -3.96460800 |
| H | 3.01737500 | -3.96702700 | 2.42958700  |
| H | 3.01887800 | 2.42761100  | 3.96466500  |
| H | 3.01741900 | 3.96702600  | -2.42953000 |
| H | 4.26770600 | 0.46475700  | -2.00741600 |
| H | 4.23283700 | 1.96417900  | 0.45130100  |
| H | 4.26766400 | -0.46475600 | 2.00749800  |
| H | 4.23284900 | -1.96417800 | -0.45121900 |
| H | 5.21273500 | -1.39971000 | -4.01573400 |
| H | 5.29434500 | -1.30704700 | -2.27105000 |
| H | 5.21691400 | -3.75193900 | -2.08756000 |
| H | 5.29613800 | -3.74413800 | -5.13702600 |
| H | 3.99593800 | -4.39446300 | -4.12933000 |
| H | 5.58440500 | -5.15919900 | -4.11830900 |
| H | 7.52176100 | -4.12112600 | -2.88125300 |
| H | 7.35387400 | -2.49679500 | -2.18566200 |
| H | 7.40246100 | -2.70956300 | -3.94014800 |
| H | 5.29426500 | -2.19425700 | 1.44193700  |
| H | 5.21060200 | -3.07335000 | 2.95143100  |
| H | 5.22873300 | -4.28650400 | 0.16328200  |
| H | 5.58440000 | -6.46585900 | 1.33037300  |
| H | 3.99430800 | -5.78846200 | 1.67859400  |
| H | 5.28617800 | -5.67142200 | 2.88071100  |
| H | 7.39737700 | -4.20610100 | 2.30458000  |
| H | 7.36057300 | -3.21588000 | 0.84012600  |
| H | 7.52877700 | -4.97855700 | 0.71894900  |
| H | 5.21265000 | 1.39971500  | 4.01583700  |
| H | 5.29429600 | 1.30705000  | 2.27115500  |
| H | 5.21686400 | 3.75194400  | 2.08766400  |



|   |             |             |             |
|---|-------------|-------------|-------------|
| H | 5.29602800  | 3.74414100  | 5.13713100  |
| H | 3.99584600  | 4.39446400  | 4.12940900  |
| H | 5.58431200  | 5.15920300  | 4.11842100  |
| H | 7.52169500  | 4.12113400  | 2.88140400  |
| H | 7.35382500  | 2.49680400  | 2.18580700  |
| H | 7.40237700  | 2.70957000  | 3.94029400  |
| H | 5.29429300  | 2.19426000  | -1.44183400 |
| H | 5.21065900  | 3.07335300  | -2.95133000 |
| H | 5.22873100  | 4.28650700  | -0.16318000 |
| H | 5.28622800  | 5.67142600  | -2.88060800 |
| H | 5.58441700  | 6.46586300  | -1.33026400 |
| H | 3.99433400  | 5.78846200  | -1.67851700 |
| H | 7.36058700  | 3.21588800  | -0.83998100 |
| H | 7.52878400  | 4.97856500  | -0.71880000 |
| H | 7.39741800  | 4.20610900  | -2.30443400 |
| H | 0.97985300  | 2.71069600  | 3.71083400  |
| H | 0.97968000  | 3.71361200  | -2.68578400 |
| H | 0.14003800  | -4.36212000 | -1.07690400 |
| H | 0.12494000  | -1.06896000 | 4.32054000  |
| H | 0.14001000  | 4.36211600  | 1.07690000  |
| H | 0.12502700  | 1.06895700  | -4.32054200 |
| H | 0.97992700  | -2.71068400 | -3.71081300 |
| H | 0.97963100  | -3.71361900 | 2.68580200  |
| N | -1.94685400 | -0.94874800 | -3.89147700 |
| C | -2.50567900 | -2.03012700 | -3.30156200 |
| C | -3.69163500 | -1.89941100 | -2.60323700 |
| C | -4.25134700 | -0.62011800 | -2.56916400 |
| C | -3.69477800 | 0.48065100  | -3.17421300 |
| C | -2.45077400 | 0.32164500  | -3.84253100 |
| C | -4.27064900 | 1.87452200  | -3.07686100 |
| C | -5.79726300 | 1.89506800  | -3.07149800 |
| C | -6.41968100 | 3.28837800  | -3.04742100 |
| C | -7.93479600 | 3.17876400  | -2.96611900 |
| C | -4.26614700 | -3.08778900 | -1.86673900 |
| C | -5.79303300 | -3.10483900 | -1.86533600 |
| C | -6.42320300 | -4.33400700 | -1.21597300 |
| C | -7.93829700 | -4.19696800 | -1.20876500 |
| O | -1.83239700 | -3.14360100 | -3.47079000 |

|   |             |             |             |
|---|-------------|-------------|-------------|
| O | -1.78069300 | 1.25419500  | -4.36438000 |
| C | -3.66790300 | 2.60309000  | -1.89707600 |
| C | -2.50280100 | 3.33153900  | -2.03924800 |
| N | -1.94442600 | 3.92860400  | -0.96044400 |
| C | -2.44188100 | 3.87542100  | 0.31322900  |
| C | -3.66824800 | 3.17874700  | 0.48089400  |
| C | -4.21086900 | 2.55102700  | -0.61235700 |
| O | -1.85353600 | 3.52112300  | -3.16412500 |
| O | -1.78242000 | 4.41659500  | 1.24207100  |
| C | -4.26618500 | 3.08778800  | 1.86665800  |
| C | -5.79307000 | 3.10483900  | 1.86522500  |
| C | -6.42322800 | 4.33400600  | 1.21584800  |
| C | -7.93832200 | 4.19696600  | 1.20860800  |
| C | -3.69168700 | 1.89941100  | 2.60316700  |
| C | -2.50574400 | 2.03012700  | 3.30151300  |
| N | -1.94693100 | 0.94875000  | 3.89144200  |
| C | -2.45085100 | -0.32164400 | 3.84248900  |
| C | -3.69484000 | -0.48065000 | 3.17414400  |
| C | -4.25139900 | 0.62011800  | 2.56908300  |
| O | -1.83246500 | 3.14360200  | 3.47075200  |
| O | -1.78078200 | -1.25419300 | 4.36435400  |
| C | -4.27070900 | -1.87452200 | 3.07678000  |
| C | -5.79732200 | -1.89506900 | 3.07138500  |
| C | -6.41973900 | -3.28838000 | 3.04729500  |
| C | -7.93485200 | -3.17876600 | 2.96596000  |
| C | -3.66793800 | -2.60309100 | 1.89700700  |
| C | -2.50284100 | -3.33154200 | 2.03920200  |
| N | -1.94444600 | -3.92860800 | 0.96040900  |
| C | -2.44187500 | -3.87542400 | -0.31327500 |
| C | -3.66823700 | -3.17874800 | -0.48096400 |
| C | -4.21087900 | -2.55102800 | 0.61227700  |
| O | -1.85359500 | -3.52112700 | 3.16409100  |
| O | -1.78239600 | -4.41659900 | -1.24210200 |
| C | -5.99735700 | 4.13052700  | -4.24202500 |
| C | -5.99694700 | 5.62784900  | 1.89338500  |
| C | -5.99744000 | -4.13052800 | 4.24190800  |
| C | -5.99690700 | -5.62785000 | -1.89350000 |
| H | -3.94414300 | 2.39864300  | -3.97927400 |

|   |             |             |             |
|---|-------------|-------------|-------------|
| H | -3.93510400 | 3.97853700  | 2.40750000  |
| H | -3.94422100 | -2.39864400 | 3.97920000  |
| H | -3.93505600 | -3.97853800 | -2.40757600 |
| H | -5.18328000 | -0.49014900 | -2.03003100 |
| H | -5.12926100 | -1.98891100 | 0.47423000  |
| H | -5.18332000 | 0.49014800  | 2.02993100  |
| H | -5.12925500 | 1.98891200  | -0.47432900 |
| H | -6.14625800 | 1.35940800  | -3.96206400 |
| H | -6.18718300 | 1.33241000  | -2.21627900 |
| H | -6.07010300 | 3.79741400  | -2.14147400 |
| H | -6.25900800 | 3.63181900  | -5.18118500 |
| H | -4.92222300 | 4.31984200  | -4.25005200 |
| H | -6.50078400 | 5.10043600  | -4.22860000 |
| H | -8.39993000 | 4.16517100  | -2.89550300 |
| H | -8.24586700 | 2.59905900  | -2.09245500 |
| H | -8.33781600 | 2.68307200  | -3.85523900 |
| H | -6.18753300 | 2.21386900  | 1.36459900  |
| H | -6.13225300 | 3.03427400  | 2.90547800  |
| H | -6.08402200 | 4.37565900  | 0.17434200  |
| H | -6.50532000 | 6.48484400  | 1.44453400  |
| H | -4.92271500 | 5.80200400  | 1.80630600  |
| H | -6.24990800 | 5.61040300  | 2.95870600  |
| H | -8.33101400 | 4.15810000  | 2.22988000  |
| H | -8.25312000 | 3.28343900  | 0.69629400  |
| H | -8.40995800 | 5.04317300  | 0.70280400  |
| H | -6.14633600 | -1.35940900 | 3.96194400  |
| H | -6.18722500 | -1.33241100 | 2.21615900  |
| H | -6.07014100 | -3.79741500 | 2.14135500  |
| H | -6.25911200 | -3.63182100 | 5.18106200  |
| H | -4.92230600 | -4.31984300 | 4.24995800  |
| H | -6.50086700 | -5.10043800 | 4.22847200  |
| H | -8.39998400 | -4.16517400 | 2.89533300  |
| H | -8.24590500 | -2.59906000 | 2.09229000  |
| H | -8.33789200 | -2.68307500 | 3.85507200  |
| H | -6.18750500 | -2.21387000 | -1.36471800 |
| H | -6.13219500 | -3.03427500 | -2.90559700 |
| H | -6.08401800 | -4.37566000 | -0.17446000 |
| H | -6.24984600 | -5.61040400 | -2.95882700 |

|   |             |             |             |
|---|-------------|-------------|-------------|
| H | -6.50528900 | -6.48484500 | -1.44466000 |
| H | -4.92267700 | -5.80200400 | -1.80639900 |
| H | -8.25310600 | -3.28344100 | -0.69645700 |
| H | -8.40994300 | -5.04317400 | -0.70296900 |
| H | -8.33096800 | -4.15810200 | -2.23004400 |
| H | -1.87714800 | -2.68164700 | 3.73087900  |
| H | -1.87478800 | -3.72944200 | -2.64597800 |
| H | -0.99206100 | 4.31391900  | -1.08741800 |
| H | -0.98771000 | 1.07312200  | 4.26308600  |
| H | -0.99208600 | -4.31392600 | 1.08740200  |
| H | -0.98762600 | -1.07312000 | -4.26310500 |
| H | -1.87708800 | 2.68164600  | -3.73091900 |
| H | -1.87483800 | 3.72943900  | 2.64593600  |
| I | 6.54935500  | 0.00000300  | 0.00006500  |

$[1_2+2l_{\text{exo}}]_2^-$

Energy = -5345.51931498 hartree

Number of imaginary frequencies (PBE0-D3/def2-SVP) = 0

XYZ

|   |            |             |            |
|---|------------|-------------|------------|
| N | 1.50753200 | -0.94408000 | 3.90675600 |
| C | 2.06886000 | -2.02545300 | 3.31760700 |
| C | 3.24598100 | -1.89086800 | 2.61149400 |
| C | 3.80443200 | -0.60869400 | 2.56563500 |
| C | 3.24178900 | 0.48952900  | 3.17661900 |
| C | 2.00149100 | 0.32889800  | 3.84497300 |
| C | 3.82201000 | 1.88243500  | 3.07983200 |
| C | 5.34833800 | 1.89250400  | 3.09707300 |
| C | 5.98278600 | 3.27810800  | 3.03538600 |
| C | 7.49780300 | 3.14191900  | 3.00590000 |
| C | 3.81920900 | -3.08289800 | 1.87975800 |
| C | 5.34580300 | -3.10043300 | 1.89471000 |
| C | 5.98743800 | -4.30254100 | 1.20955200 |
| C | 7.50189100 | -4.16680900 | 1.26233200 |
| O | 1.39598500 | -3.14368000 | 3.49514300 |
| O | 1.31243300 | 1.25904100  | 4.36057900 |
| C | 3.23258500 | 2.60137100  | 1.88786000 |
| C | 2.07174600 | 3.33117800  | 2.03029500 |

|   |            |             |             |
|---|------------|-------------|-------------|
| N | 1.51037600 | 3.92473100  | 0.95093100  |
| C | 1.99991100 | 3.85941300  | -0.32377700 |
| C | 3.22611100 | 3.16735200  | -0.49107900 |
| C | 3.77900200 | 2.53889600  | 0.60146000  |
| O | 1.41828200 | 3.52741400  | 3.15737900  |
| O | 1.32048800 | 4.39269200  | -1.25078200 |
| C | 3.81920400 | 3.08290100  | -1.87973400 |
| C | 5.34579900 | 3.10043800  | -1.89467900 |
| C | 5.98742800 | 4.30254800  | -1.20951700 |
| C | 7.50188100 | 4.16682000  | -1.26228900 |
| C | 3.24598200 | 1.89086900  | -2.61147200 |
| C | 2.06886600 | 2.02545200  | -3.31759400 |
| N | 1.50755000 | 0.94407800  | -3.90675200 |
| C | 2.00151300 | -0.32890000 | -3.84496700 |
| C | 3.24180400 | -0.48952700 | -3.17660000 |
| C | 3.80443800 | 0.60869700  | -2.56561000 |
| O | 1.39598500 | 3.14367600  | -3.49512700 |
| O | 1.31246000 | -1.25904200 | -4.36058000 |
| C | 3.82203000 | -1.88243200 | -3.07981000 |
| C | 5.34835800 | -1.89249300 | -3.09704500 |
| C | 5.98281200 | -3.27809500 | -3.03535400 |
| C | 7.49782800 | -3.14189800 | -3.00586500 |
| C | 3.23260400 | -2.60137000 | -1.88784000 |
| C | 2.07176600 | -3.33118100 | -2.03028000 |
| N | 1.51039400 | -3.92473400 | -0.95091800 |
| C | 1.99992700 | -3.85941700 | 0.32379100  |
| C | 3.22612300 | -3.16735100 | 0.49109900  |
| C | 3.77901600 | -2.53889400 | -0.60143900 |
| O | 1.41831100 | -3.52742200 | -3.15736700 |
| O | 1.32050600 | -4.39270400 | 1.25079300  |
| C | 5.52929100 | 4.18503300  | 4.16977900  |
| C | 5.52879700 | 5.62914900  | -1.79657500 |
| C | 5.52932600 | -4.18502300 | -4.16974800 |
| C | 5.52880800 | -5.62914300 | 1.79660900  |
| H | 3.47883500 | 2.41453400  | 3.97184800  |
| H | 3.47417000 | 3.97170100  | -2.41604900 |
| H | 3.47886000 | -2.41453200 | -3.97182700 |
| H | 3.47417400 | -3.97169900 | 2.41607100  |

|   |            |             |             |
|---|------------|-------------|-------------|
| H | 4.72642700 | -0.47218000 | 2.00535700  |
| H | 4.69298100 | -1.96345100 | -0.46005000 |
| H | 4.72642700 | 0.47218600  | -2.00532200 |
| H | 4.69296800 | 1.96345600  | 0.46007400  |
| H | 5.67575600 | 1.38897800  | 4.01523900  |
| H | 5.75406500 | 1.30095300  | 2.27078700  |
| H | 5.67385000 | 3.74490900  | 2.09251200  |
| H | 5.75660900 | 3.73196700  | 5.14135300  |
| H | 4.45506200 | 4.38110300  | 4.13477400  |
| H | 6.04248600 | 5.15009400  | 4.12449700  |
| H | 7.98042300 | 4.11616800  | 2.88240400  |
| H | 7.81288000 | 2.49113500  | 2.18618600  |
| H | 7.86363700 | 2.70307000  | 3.94092700  |
| H | 5.75237000 | 2.19475700  | -1.43438100 |
| H | 5.66784100 | 3.07382100  | -2.94335800 |
| H | 5.68980100 | 4.28433200  | -0.15468400 |
| H | 6.04684600 | 6.46555100  | -1.31824100 |
| H | 4.45575200 | 5.78769600  | -1.66557200 |
| H | 5.74561000 | 5.67269100  | -2.86989400 |
| H | 7.85675900 | 4.20593000  | -2.29827700 |
| H | 7.82047800 | 3.21211500  | -0.83596800 |
| H | 7.99114800 | 4.97512400  | -0.71039700 |
| H | 5.67577800 | -1.38896500 | -4.01520900 |
| H | 5.75407800 | -1.30094200 | -2.27075600 |
| H | 5.67387600 | -3.74489700 | -2.09248100 |
| H | 5.75664500 | -3.73195800 | -5.14132100 |
| H | 4.45509700 | -4.38109900 | -4.13474700 |
| H | 6.04252300 | -5.15008300 | -4.12446300 |
| H | 7.98045300 | -4.11614600 | -2.88236800 |
| H | 7.81290000 | -2.49111400 | -2.18614900 |
| H | 7.86366200 | -2.70304600 | -3.94089000 |
| H | 5.75237600 | -2.19475000 | 1.43441400  |
| H | 5.66784000 | -3.07381500 | 2.94339100  |
| H | 5.68981700 | -4.28432700 | 0.15471700  |
| H | 5.74561700 | -5.67268400 | 2.86992800  |
| H | 6.04686100 | -6.46554400 | 1.31827700  |
| H | 4.45576400 | -5.78769100 | 1.66560100  |
| H | 7.82048700 | -3.21210400 | 0.83601000  |

|   |             |             |             |
|---|-------------|-------------|-------------|
| H | 7.99116300  | -4.97511200 | 0.71044400  |
| H | 7.85676400  | -4.20591600 | 2.29832200  |
| H | 1.43321900  | -2.68422500 | -3.71911600 |
| H | 1.43041700  | -3.71770700 | 2.66140100  |
| H | 0.57018600  | 4.32192800  | 1.08060800  |
| H | 0.56034900  | 1.07132800  | -4.28986800 |
| H | 0.57020800  | -4.32193900 | -1.08060000 |
| H | 0.56032500  | -1.07133300 | 4.28986000  |
| H | 1.43318300  | 2.68421000  | 3.71911700  |
| H | 1.43040600  | 3.71769400  | -2.66137800 |
| N | -1.50756400 | 0.94461800  | 3.90665100  |
| C | -2.06887600 | 2.02590700  | 3.31733400  |
| C | -3.24598100 | 1.89122200  | 2.61121400  |
| C | -3.80443000 | 0.60904100  | 2.56551800  |
| C | -3.24180100 | -0.48909500 | 3.17667000  |
| C | -2.00151500 | -0.32837200 | 3.84502800  |
| C | -3.82202400 | -1.88201300 | 3.08006800  |
| C | -5.34835200 | -1.89207900 | 3.09730400  |
| C | -5.98279800 | -3.27769300 | 3.03580100  |
| C | -7.49781500 | -3.14151100 | 3.00628300  |
| C | -3.81920500 | 3.08315200  | 1.87931100  |
| C | -5.34579900 | 3.10069100  | 1.89426000  |
| C | -5.98743400 | 4.30270500  | 1.20893300  |
| C | -7.50188700 | 4.16697700  | 1.26172700  |
| O | -1.39600300 | 3.14416000  | 3.49472300  |
| O | -1.31246400 | -1.25844400 | 4.36076800  |
| C | -3.23259500 | -2.60111000 | 1.88819700  |
| C | -2.07175300 | -3.33089100 | 2.03073300  |
| N | -1.51037400 | -3.92458600 | 0.95145200  |
| C | -1.99990800 | -3.85944300 | -0.32326600 |
| C | -3.22611200 | -3.16741100 | -0.49066500 |
| C | -3.77900800 | -2.53880900 | 0.60178700  |
| O | -1.41829300 | -3.52697600 | 3.15784600  |
| O | -1.32048700 | -4.39284500 | -1.25020000 |
| C | -3.81920000 | -3.08315500 | -1.87933300 |
| C | -5.34579400 | -3.10069800 | -1.89428600 |
| C | -5.98742600 | -4.30271000 | -1.20895300 |
| C | -7.50187900 | -4.16698500 | -1.26174700 |

|   |             |             |             |
|---|-------------|-------------|-------------|
| C | -3.24597400 | -1.89122800 | -2.61123600 |
| C | -2.06886200 | -2.02591200 | -3.31734500 |
| N | -1.50754300 | -0.94462200 | -3.90665300 |
| C | -2.00149400 | 0.32836800  | -3.84503100 |
| C | -3.24178500 | 0.48909200  | -3.17668400 |
| C | -3.80442100 | -0.60904500 | -2.56554200 |
| O | -1.39598800 | -3.14416600 | -3.49473100 |
| O | -1.31243900 | 1.25843900  | -4.36076600 |
| C | -3.82200800 | 1.88201200  | -3.08009000 |
| C | -5.34833500 | 1.89207900  | -3.09733800 |
| C | -5.98278100 | 3.27769200  | -3.03583800 |
| C | -7.49779900 | 3.14150900  | -3.00633000 |
| C | -3.23258700 | 2.60111200  | -1.88821700 |
| C | -2.07174300 | 3.33089300  | -2.03074800 |
| N | -1.51037000 | 3.92458800  | -0.95146500 |
| C | -1.99990900 | 3.85944100  | 0.32325100  |
| C | -3.22611500 | 3.16741100  | 0.49064400  |
| C | -3.77900800 | 2.53881400  | -0.60181000 |
| O | -1.41827900 | 3.52697700  | -3.15785900 |
| O | -1.32049000 | 4.39283900  | 1.25018900  |
| C | -5.52931200 | -4.18446100 | 4.17032300  |
| C | -5.52879900 | -5.62939500 | -1.79582300 |
| C | -5.52928800 | 4.18446000  | -4.17035700 |
| C | -5.52880900 | 5.62938800  | 1.79581000  |
| H | -3.47885300 | -2.41399100 | 3.97215800  |
| H | -3.47416200 | -3.97203100 | -2.41552100 |
| H | -3.47882900 | 2.41398600  | -3.97218000 |
| H | -3.47416900 | 3.97202600  | 2.41550200  |
| H | -4.72641000 | 0.47244500  | 2.00523700  |
| H | -4.69298000 | 1.96340100  | -0.46035100 |
| H | -4.72640700 | -0.47245300 | -2.00527000 |
| H | -4.69297700 | -1.96339300 | 0.46032200  |
| H | -5.67577500 | -1.38842800 | 4.01539900  |
| H | -5.75407500 | -1.30064100 | 2.27093500  |
| H | -5.67385300 | -3.74462300 | 2.09299400  |
| H | -5.75664200 | -3.73126300 | 5.14183200  |
| H | -4.45508100 | -4.38053100 | 4.13535700  |
| H | -6.04250100 | -5.14953100 | 4.12516700  |



|   |             |             |             |
|---|-------------|-------------|-------------|
| H | -7.98043100 | -4.11577900 | 2.88292300  |
| H | -7.81288700 | -2.49084600 | 2.18647200  |
| H | -7.86365700 | -2.70252700 | 3.94124300  |
| H | -5.75237000 | -2.19495000 | -1.43412100 |
| H | -5.66783000 | -3.07423100 | -2.94297000 |
| H | -5.68980100 | -4.28434400 | -0.15412200 |
| H | -6.04685400 | -6.46572700 | -1.31737200 |
| H | -4.45575500 | -5.78792900 | -1.66479500 |
| H | -5.74561100 | -5.67308700 | -2.86913600 |
| H | -7.85675400 | -4.20624300 | -2.29773100 |
| H | -7.82047400 | -3.21221700 | -0.83556500 |
| H | -7.99114800 | -4.97520800 | -0.70974000 |
| H | -5.67575200 | 1.38842800  | -4.01543500 |
| H | -5.75406400 | 1.30064000  | -2.27097200 |
| H | -5.67384300 | 3.74462300  | -2.09302900 |
| H | -5.75660900 | 3.73126100  | -5.14186700 |
| H | -4.45505800 | 4.38053300  | -4.13538100 |
| H | -6.04247900 | 5.14953000  | -4.12520700 |
| H | -7.98041600 | 4.11577700  | -2.88297100 |
| H | -7.81287500 | 2.49084200  | -2.18652300 |
| H | -7.86363500 | 2.70252800  | -3.94129400 |
| H | -5.75237200 | 2.19494500  | 1.43409000  |
| H | -5.66783800 | 3.07421800  | 2.94294300  |
| H | -5.68980900 | 4.28434600  | 0.15410200  |
| H | -5.74562000 | 5.67307500  | 2.86912300  |
| H | -6.04686500 | 6.46572200  | 1.31736300  |
| H | -4.45576500 | 5.78792400  | 1.66478200  |
| H | -7.82047900 | 3.21221100  | 0.83554000  |
| H | -7.99115800 | 4.97520200  | 0.70972500  |
| H | -7.85676200 | 4.20622900  | 2.29771100  |
| H | -1.43319500 | 2.68370900  | -3.71949500 |
| H | -1.43041400 | 3.71805800  | 2.66089400  |
| H | -0.57017800 | -4.32175200 | 1.08118500  |
| H | -0.56034400 | -1.07192900 | -4.28975400 |
| H | -0.57016700 | 4.32174600  | -1.08118600 |
| H | -0.56036600 | 1.07192300  | 4.28975500  |
| H | -1.43321200 | -2.68371300 | 3.71948700  |
| H | -1.43041300 | -3.71806900 | -2.66090700 |

|   |             |            |             |
|---|-------------|------------|-------------|
| I | 7.09478200  | 0.00000200 | 0.00001500  |
| I | -7.09480700 | 0.00000000 | -0.00002400 |

**2**

Energy = -2310.59927226 hartree

Number of imaginary frequencies (PBE0-D3/def2-SVP) = 0

|   |           |           |           |
|---|-----------|-----------|-----------|
| C | 1.226051  | -3.497467 | -1.828006 |
| C | 1.227514  | -2.887412 | -0.558308 |
| C | -0.007429 | -2.604321 | 0.028449  |
| C | -1.234109 | -2.898958 | -0.565315 |
| C | -1.194154 | -3.526153 | -1.816623 |
| C | -2.571936 | -2.530404 | 0.040575  |
| C | -2.575856 | -2.522569 | 1.572220  |
| C | -3.930294 | -2.201684 | 2.208130  |
| C | -3.808473 | -2.199980 | 3.727468  |
| C | 2.546117  | -2.533706 | 0.103374  |
| C | 2.487482  | -2.510537 | 1.633420  |
| C | 3.823857  | -2.223547 | 2.320982  |
| C | 3.632359  | -2.154732 | 3.831588  |
| O | 2.340821  | -3.813935 | -2.506944 |
| C | -3.092249 | -1.220038 | -0.527557 |
| C | -4.131503 | -1.188585 | -1.475187 |
| C | -4.161882 | 1.227665  | -1.369075 |
| C | -3.101344 | 1.235974  | -0.456731 |
| C | -2.586792 | -0.001696 | -0.077802 |
| O | -4.664210 | -2.308255 | -2.005100 |
| C | -2.546117 | 2.533706  | 0.103372  |
| C | -2.487482 | 2.510538  | 1.633418  |
| C | -3.823857 | 2.223550  | 2.320981  |
| C | -3.632359 | 2.154736  | 3.831587  |
| C | -1.227514 | 2.887411  | -0.558311 |
| C | -1.226050 | 3.497465  | -1.828009 |
| C | 1.194154  | 3.526152  | -1.816626 |
| C | 1.234109  | 2.898958  | -0.565317 |
| C | 0.007429  | 2.604321  | 0.028447  |
| O | -2.340821 | 3.813932  | -2.506948 |
| C | 2.571936  | 2.530404  | 0.040574  |

|   |           |           |           |
|---|-----------|-----------|-----------|
| C | 2.575856  | 2.522570  | 1.572218  |
| C | 3.930294  | 2.201684  | 2.208129  |
| C | 3.808472  | 2.199981  | 3.727467  |
| C | 3.092249  | 1.220038  | -0.527557 |
| C | 4.131503  | 1.188584  | -1.475187 |
| C | 4.161882  | -1.227666 | -1.369075 |
| C | 3.101344  | -1.235974 | -0.456730 |
| C | 2.586792  | 0.001696  | -0.077802 |
| O | 4.664211  | 2.308253  | -2.005101 |
| C | -5.035328 | -3.142511 | 1.740502  |
| C | -4.904743 | 3.231417  | 1.946028  |
| C | 5.035328  | 3.142510  | 1.740500  |
| C | 4.904744  | -3.231414 | 1.946030  |
| H | -3.277235 | -3.317436 | -0.263467 |
| H | -3.254376 | 3.332409  | -0.164713 |
| H | 3.277235  | 3.317436  | -0.263469 |
| H | 3.254376  | -3.332409 | -0.164710 |
| H | -0.014031 | -2.132832 | 1.011591  |
| H | 1.754997  | 0.017608  | 0.631161  |
| H | 0.014031  | 2.132833  | 1.011589  |
| H | -1.754997 | -0.017607 | 0.631161  |
| H | -2.228304 | -3.510639 | 1.923258  |
| H | -1.840198 | -1.793961 | 1.952155  |
| H | -4.207859 | -1.179706 | 1.893336  |
| H | -4.777071 | -4.193643 | 1.955518  |
| H | -5.225457 | -3.053595 | 0.660274  |
| H | -5.981848 | -2.921603 | 2.257752  |
| H | -4.757102 | -1.909639 | 4.205061  |
| H | -3.033470 | -1.494673 | 4.067915  |
| H | -3.537378 | -3.200199 | 4.105142  |
| H | -1.762689 | 1.751864  | 1.972718  |
| H | -2.092597 | 3.481297  | 1.982202  |
| H | -4.161446 | 1.228016  | 1.980598  |
| H | -5.839071 | 3.024631  | 2.490594  |
| H | -5.138872 | 3.206108  | 0.871225  |
| H | -4.592080 | 4.258549  | 2.200583  |
| H | -3.294189 | 3.124655  | 4.233374  |
| H | -2.878937 | 1.399599  | 4.107137  |

|   |           |           |           |
|---|-----------|-----------|-----------|
| H | -4.571206 | 1.891482  | 4.342952  |
| H | 2.228305  | 3.510640  | 1.923256  |
| H | 1.840198  | 1.793963  | 1.952154  |
| H | 4.207858  | 1.179706  | 1.893336  |
| H | 4.777072  | 4.193642  | 1.955516  |
| H | 5.225458  | 3.053594  | 0.660272  |
| H | 5.981848  | 2.921602  | 2.257750  |
| H | 4.757101  | 1.909640  | 4.205060  |
| H | 3.033469  | 1.494675  | 4.067914  |
| H | 3.537378  | 3.200200  | 4.105140  |
| H | 1.762689  | -1.751863 | 1.972720  |
| H | 2.092598  | -3.481295 | 1.982205  |
| H | 4.161445  | -1.228013 | 1.980599  |
| H | 4.592082  | -4.258546 | 2.200586  |
| H | 5.839072  | -3.024627 | 2.490595  |
| H | 5.138872  | -3.206106 | 0.871227  |
| H | 2.878937  | -1.399596 | 4.107138  |
| H | 4.571206  | -1.891477 | 4.342953  |
| H | 3.294190  | -3.124651 | 4.233376  |
| H | 3.961533  | 2.980768  | -2.071662 |
| H | 3.141311  | -3.415936 | -2.123837 |
| H | -3.961531 | -2.980769 | -2.071662 |
| H | -3.141311 | 3.415932  | -2.123842 |
| O | -4.666101 | 2.441354  | -1.756678 |
| H | -5.356805 | 2.311936  | -2.415823 |
| O | -2.387380 | -3.837060 | -2.411530 |
| H | -2.225256 | -4.235168 | -3.273532 |
| O | 4.666099  | -2.441355 | -1.756679 |
| H | 5.356803  | -2.311937 | -2.415824 |
| O | 2.387380  | 3.837058  | -2.411533 |
| H | 2.225256  | 4.235166  | -3.273535 |
| C | 0.010875  | -3.825309 | -2.437775 |
| H | 0.039866  | -4.310216 | -3.417078 |
| C | -4.664836 | 0.037701  | -1.882558 |
| H | -5.472448 | 0.032661  | -2.619090 |
| C | 4.664835  | -0.037702 | -1.882559 |
| H | 5.472447  | -0.032663 | -2.619091 |
| C | -0.010875 | 3.825307  | -2.437778 |

H -0.039866 4.310213 -3.417081

**2<sub>2</sub>**

Energy = -4621.27735131 hartree

Number of imaginary frequencies (PBE0-D3/def2-SVP) = 0

C -1.982953 2.624422 3.117096  
C -3.059137 2.304447 2.287625  
C -3.567664 1.014021 2.383068  
C -3.072866 0.043843 3.244180  
C -2.002286 0.412942 4.053585  
C -3.648152 -1.353962 3.322143  
C -5.178009 -1.355623 3.273700  
C -5.827685 -2.724113 3.457668  
C -7.339236 -2.596030 3.344229  
C -3.650723 3.333189 1.346339  
C -5.180514 3.292267 1.326185  
C -5.840262 4.387777 0.493533  
C -7.349057 4.193847 0.489017  
O -1.370802 3.842938 3.116712  
C -3.032798 -2.286562 2.298257  
C -1.971350 -3.130806 2.626311  
C -1.995987 -4.076273 0.417778  
C -3.050752 -3.250467 0.041536  
C -3.531041 -2.374477 1.004446  
O -1.370896 -3.136050 3.850490  
C -3.651066 -3.333020 -1.346118  
C -5.180847 -3.292223 -1.325483  
C -5.840194 -4.388045 -0.492925  
C -7.348986 -4.194114 -0.487587  
C -3.059741 -2.304136 -2.287416  
C -1.983227 -2.623782 -3.116552  
C -2.003148 -0.412461 -4.053306  
C -3.073932 -0.043545 -3.244128  
C -3.568686 -1.013874 -2.383117  
O -1.370353 -3.841951 -3.115821  
C -3.649183 1.354280 -3.322015  
C -5.179002 1.356077 -3.273180

|   |           |           |           |
|---|-----------|-----------|-----------|
| C | -5.828574 | 2.724635  | -3.457015 |
| C | -7.340092 | 2.596779  | -3.342925 |
| C | -3.033454 | 2.286793  | -2.298250 |
| C | -1.971719 | 3.130672  | -2.626411 |
| C | -1.995595 | 4.075826  | -0.417693 |
| C | -3.050719 | 3.250503  | -0.041428 |
| C | -3.531513 | 2.374818  | -1.004360 |
| O | -1.371557 | 3.136010  | -3.850706 |
| C | -5.435122 | -3.380920 | 4.772863  |
| C | -5.474644 | -5.783888 | -0.976289 |
| C | -5.436462 | 3.381244  | -4.772445 |
| C | -5.474478 | 5.783800  | 0.976192  |
| H | -3.384970 | -1.738607 | 4.310159  |
| H | -3.388274 | -4.314387 | -1.747701 |
| H | -3.386129 | 1.738913  | -4.310076 |
| H | -3.387907 | 4.314625  | 1.747718  |
| H | -4.403643 | 0.749628  | 1.747497  |
| H | -4.361898 | 1.731984  | -0.735856 |
| H | -4.404859 | -0.749680 | -1.747725 |
| H | -4.361211 | -1.731348 | 0.735987  |
| H | -5.537116 | -0.677794 | 4.056874  |
| H | -5.531598 | -0.930680 | 2.329266  |
| H | -5.481451 | -3.372003 | 2.644339  |
| H | -5.682573 | -2.734085 | 5.621131  |
| H | -4.366994 | -3.603934 | 4.818256  |
| H | -5.970269 | -4.323953 | 4.907809  |
| H | -7.825379 | -3.572198 | 3.412566  |
| H | -7.630221 | -2.143753 | 2.392236  |
| H | -7.738825 | -1.967941 | 4.146811  |
| H | -5.531779 | -2.323265 | -0.957542 |
| H | -5.533618 | -3.363079 | -2.360899 |
| H | -5.482608 | -4.286528 | 0.538253  |
| H | -6.011338 | -6.543537 | -0.402880 |
| H | -4.407479 | -5.990292 | -0.870464 |
| H | -5.741307 | -5.913242 | -2.030477 |
| H | -7.758977 | -4.296818 | -1.497386 |
| H | -7.621529 | -3.202085 | -0.117408 |
| H | -7.841043 | -4.934403 | 0.147835  |

|   |           |           |           |
|---|-----------|-----------|-----------|
| H | -5.538414 | 0.678257  | -4.056224 |
| H | -5.532384 | 0.931226  | -2.328627 |
| H | -5.481900 | 3.372558  | -2.643900 |
| H | -5.684398 | 2.734368  | -5.620541 |
| H | -4.368313 | 3.604056  | -4.818319 |
| H | -5.971493 | 4.324362  | -4.907255 |
| H | -7.826138 | 3.572995  | -3.411279 |
| H | -7.630743 | 2.144755  | -2.390710 |
| H | -7.740098 | 1.968564  | -4.145203 |
| H | -5.531490 | 2.323150  | 0.958699  |
| H | -5.532925 | 3.363421  | 2.361705  |
| H | -5.483190 | 4.285878  | -0.537783 |
| H | -5.740589 | 5.913538  | 2.030473  |
| H | -6.011487 | 6.543228  | 0.402784  |
| H | -4.407373 | 5.990183  | 0.869726  |
| H | -7.621790 | 3.201644  | 0.119443  |
| H | -7.841419 | 4.933840  | -0.146516 |
| H | -7.758552 | 4.297032  | 1.498968  |
| H | -1.483722 | 2.264594  | -4.276417 |
| H | -1.491925 | 4.277667  | 2.251866  |
| H | -1.483433 | -2.264777 | 4.276376  |
| H | -1.491879 | -4.276993 | -2.251177 |
| O | -1.454233 | -4.936229 | -0.500042 |
| H | -0.579521 | -5.203117 | -0.170461 |
| O | -1.443180 | -0.510607 | 4.895605  |
| H | -0.566325 | -0.177866 | 5.152923  |
| O | -1.453200 | 4.935335  | 0.500175  |
| H | -0.577762 | 5.200560  | 0.171067  |
| O | -1.444014 | 0.511077  | -4.895318 |
| H | -0.567537 | 0.177837  | -5.153228 |
| C | -1.490601 | 1.694771  | 4.014870  |
| H | -0.688318 | 1.971886  | 4.683445  |
| C | -1.485866 | -4.037476 | 1.700768  |
| H | -0.695289 | -4.717743 | 1.984034  |
| C | -1.485729 | 4.036999  | -1.700768 |
| H | -0.694923 | 4.716969  | -1.984072 |
| C | -1.491069 | -1.694102 | -4.014327 |
| H | -0.688498 | -1.970957 | -4.682661 |

|   |          |           |           |
|---|----------|-----------|-----------|
| C | 2.008784 | 2.583789  | -3.160192 |
| C | 3.077527 | 2.269838  | -2.325524 |
| C | 3.567497 | 0.972897  | -2.400045 |
| C | 3.055613 | -0.006863 | -3.243220 |
| C | 1.980461 | 0.355890  | -4.056095 |
| C | 3.644697 | -1.401063 | -3.305443 |
| C | 5.174690 | -1.387822 | -3.266454 |
| C | 5.832659 | -2.751460 | -3.457472 |
| C | 7.342159 | -2.618645 | -3.323907 |
| C | 3.654422 | 3.311665  | -1.391450 |
| C | 5.184079 | 3.274866  | -1.353931 |
| C | 5.835119 | 4.367579  | -0.510931 |
| C | 7.346234 | 4.192814  | -0.519021 |
| O | 1.455213 | 3.835134  | -3.105613 |
| C | 3.046617 | -2.324835 | -2.265330 |
| C | 1.990497 | -3.173704 | -2.581984 |
| C | 1.972962 | -4.073473 | -0.354287 |
| C | 3.035773 | -3.245715 | 0.009396  |
| C | 3.531185 | -2.390336 | -0.966869 |
| O | 1.444545 | -3.129308 | -3.836925 |
| C | 3.654358 | -3.311846 | 1.391237  |
| C | 5.183999 | -3.275457 | 1.353019  |
| C | 5.834307 | -4.368550 | 0.509954  |
| C | 7.345472 | -4.194189 | 0.517186  |
| C | 3.078010 | -2.269816 | 2.325393  |
| C | 2.008971 | -2.583370 | 3.159800  |
| C | 1.981238 | -0.355462 | 4.055757  |
| C | 3.056734 | 0.006907  | 3.243181  |
| C | 3.568509 | -0.973075 | 2.400151  |
| O | 1.454800 | -3.834428 | 3.105110  |
| C | 3.646088 | 1.401009  | 3.305381  |
| C | 5.176040 | 1.387594  | 3.265948  |
| C | 5.834209 | 2.751163  | 3.456801  |
| C | 7.343635 | 2.618244  | 3.322517  |
| C | 3.047852 | 2.324856  | 2.265411  |
| C | 1.991738 | 3.173671  | 2.582184  |
| C | 1.973468 | 4.073131  | 0.354411  |
| C | 3.036336 | 3.245535  | -0.009404 |



|   |          |           |           |
|---|----------|-----------|-----------|
| C | 3.532116 | 2.390334  | 0.966816  |
| O | 1.446234 | 3.129490  | 3.837349  |
| C | 5.460181 | -3.394870 | -4.785186 |
| C | 5.446251 | -5.765666 | 0.971254  |
| C | 5.462405 | 3.394472  | 4.784752  |
| C | 5.447207 | 5.764913  | -0.971682 |
| H | 3.379413 | -1.810540 | -4.282871 |
| H | 3.393721 | -4.283507 | 1.817023  |
| H | 3.381017 | 1.810428  | 4.282898  |
| H | 3.393880 | 4.283449  | -1.817008 |
| H | 4.402214 | 0.708299  | -1.762904 |
| H | 4.363468 | 1.747095  | 0.702308  |
| H | 4.403489 | -0.708769 | 1.763239  |
| H | 4.362517 | -1.747011 | -0.702494 |
| H | 5.525382 | -0.704524 | -4.048553 |
| H | 5.528926 | -0.964797 | -2.321486 |
| H | 5.478888 | -3.409576 | -2.655490 |
| H | 5.721683 | -2.739434 | -5.622541 |
| H | 4.392811 | -3.616373 | -4.850631 |
| H | 5.996846 | -4.336868 | -4.921311 |
| H | 7.833545 | -3.591493 | -3.401474 |
| H | 7.619600 | -2.179963 | -2.361614 |
| H | 7.748387 | -1.976583 | -4.111978 |
| H | 5.534739 | -2.304992 | 0.988691  |
| H | 5.545363 | -3.353074 | 2.385088  |
| H | 5.485224 | -4.248790 | -0.522006 |
| H | 5.981132 | -6.524516 | 0.395100  |
| H | 4.378108 | -5.957153 | 0.848299  |
| H | 5.697422 | -5.911787 | 2.027079  |
| H | 7.747920 | -4.320525 | 1.527329  |
| H | 7.633214 | -3.199166 | 0.166950  |
| H | 7.831767 | -4.929101 | -0.128822 |
| H | 5.526923 | 0.704217  | 4.047893  |
| H | 5.529950 | 0.964605  | 2.320844  |
| H | 5.480116 | 3.409387  | 2.655044  |
| H | 5.724373 | 2.738985  | 5.621922  |
| H | 4.395061 | 3.615923  | 4.850780  |
| H | 5.999107 | 4.336480  | 4.920658  |

|   |          |           |           |
|---|----------|-----------|-----------|
| H | 7.835154 | 3.591023  | 3.400096  |
| H | 7.620601 | 2.179764  | 2.359994  |
| H | 7.750155 | 1.975953  | 4.110252  |
| H | 5.534742 | 2.304206  | -0.990052 |
| H | 5.544945 | 3.352641  | -2.386163 |
| H | 5.486564 | 4.247664  | 0.521187  |
| H | 5.697947 | 5.911260  | -2.027577 |
| H | 5.982534 | 6.523467  | -0.395554 |
| H | 4.379167 | 5.956649  | -0.848201 |
| H | 7.633906 | 3.197643  | -0.169146 |
| H | 7.833079 | 4.927466  | 0.126867  |
| H | 7.748157 | 4.319246  | -1.529360 |
| H | 0.570415 | 3.549037  | 3.789971  |
| H | 0.581982 | 3.787602  | -3.529976 |
| H | 0.568093 | -3.547641 | -3.788816 |
| H | 0.581448 | -3.786247 | 3.529260  |
| O | 1.375096 | -4.945588 | 0.506967  |
| H | 1.487818 | -4.632124 | 1.424575  |
| O | 1.363537 | -0.505712 | -4.914177 |
| H | 1.485337 | -1.424831 | -4.610626 |
| O | 1.375273 | 4.945033  | -0.506827 |
| H | 1.488691 | 4.632162  | -1.424559 |
| O | 1.364278 | 0.506188  | 4.913745  |
| H | 1.486013 | 1.425355  | 4.610242  |
| C | 1.493185 | 1.650168  | -4.036805 |
| H | 0.692021 | 1.928860  | -4.706218 |
| C | 1.483219 | -4.056011 | -1.648105 |
| H | 0.690736 | -4.735440 | -1.927646 |
| C | 1.483995 | 4.055699  | 1.648302  |
| H | 0.691357 | 4.734903  | 1.927977  |
| C | 1.493563 | -1.649574 | 4.036298  |
| H | 0.692153 | -1.927986 | 4.705513  |

[2<sub>2</sub>+Me<sub>4</sub>N<sub>endo</sub>]<sup>+</sup>

Energy = -4835.34106386 hartree

Number of imaginary frequencies (PBE0-D3/def2-SVP) = 0

|   |         |          |          |
|---|---------|----------|----------|
| C | 1.97976 | -2.67146 | 3.06837  |
| C | 3.06396 | -2.33576 | 2.25043  |
| C | 3.56132 | -1.04080 | 2.36359  |
| C | 3.05604 | -0.07934 | 3.23025  |
| C | 1.97752 | -0.46344 | 4.02663  |
| C | 3.64121 | 1.31480  | 3.33537  |
| C | 5.17210 | 1.30145  | 3.31668  |
| C | 5.83162 | 2.66007  | 3.53711  |
| C | 7.34361 | 2.51345  | 3.45656  |
| C | 3.68151 | -3.34510 | 1.30162  |
| C | 5.21093 | -3.28932 | 1.30798  |
| C | 5.89504 | -4.37069 | 0.47591  |
| C | 7.40188 | -4.16433 | 0.50786  |
| O | 1.36877 | -3.88394 | 3.04822  |
| C | 3.05391 | 2.26699  | 2.31051  |
| C | 1.97972 | 3.10347  | 2.62311  |
| C | 2.07415 | 4.09445  | 0.43327  |
| C | 3.13525 | 3.26926  | 0.06530  |
| C | 3.58936 | 2.38076  | 1.03199  |
| O | 1.32696 | 3.07553  | 3.81602  |
| C | 3.77241 | 3.36366  | -1.31093 |
| C | 5.29999 | 3.30789  | -1.25090 |
| C | 5.94749 | 4.39461  | -0.39672 |
| C | 7.45367 | 4.18513  | -0.35641 |
| C | 3.18755 | 2.34942  | -2.27788 |
| C | 2.07376 | 2.66494  | -3.06367 |
| C | 2.09159 | 0.46367  | -4.03266 |
| C | 3.19522 | 0.09453  | -3.26546 |
| C | 3.71397 | 1.06729  | -2.41741 |
| O | 1.44246 | 3.86647  | -3.03673 |
| C | 3.75430 | -1.31268 | -3.35461 |
| C | 5.28252 | -1.34156 | -3.28614 |
| C | 5.91124 | -2.71755 | -3.48871 |
| C | 7.42288 | -2.61445 | -3.35318 |
| C | 3.10921 | -2.25048 | -2.34570 |
| C | 2.03034 | -3.07261 | -2.68462 |
| C | 2.03121 | -4.04672 | -0.48357 |
| C | 3.09878 | -3.24139 | -0.09384 |

|   |         |          |          |
|---|---------|----------|----------|
| C | 3.60138 | -2.36816 | -1.04922 |
| O | 1.42697 | -3.06119 | -3.90218 |
| C | 5.41629 | 3.29945  | 4.85395  |
| C | 5.60713 | 5.79548  | -0.88405 |
| C | 5.52584 | -3.34056 | -4.82242 |
| C | 5.52957 | -5.77454 | 0.93556  |
| H | 3.36406 | 1.69006  | 4.32317  |
| H | 3.52867 | 4.35305  | -1.70561 |
| H | 3.49657 | -1.68259 | -4.34984 |
| H | 3.42194 | -4.33621 | 1.68041  |
| H | 4.40970 | -0.76982 | 1.74726  |
| H | 4.44888 | -1.75084 | -0.77376 |
| H | 4.58092 | 0.80879  | -1.82217 |
| H | 4.43269 | 1.74818  | 0.77937  |
| H | 5.50718 | 0.60810  | 4.09632  |
| H | 5.54116 | 0.88672  | 2.37334  |
| H | 5.51391 | 3.32585  | 2.72619  |
| H | 5.63546 | 2.63618  | 5.69684  |
| H | 4.35097 | 3.54021  | 4.88043  |
| H | 5.96127 | 4.23156  | 5.01731  |
| H | 7.83894 | 3.48221  | 3.55000  |
| H | 7.65230 | 2.07115  | 2.50548  |
| H | 7.71700 | 1.87071  | 4.25956  |
| H | 5.63378 | 2.33406  | -0.87900 |
| H | 5.67917 | 3.38102  | -2.27634 |
| H | 5.56544 | 4.29261  | 0.62606  |
| H | 6.13744 | 6.54680  | -0.29507 |
| H | 4.54026 | 6.01610  | -0.80332 |
| H | 5.90190 | 5.92681  | -1.93010 |
| H | 7.88919 | 4.28981  | -1.35479 |
| H | 7.70896 | 3.18915  | 0.01548  |
| H | 7.93640 | 4.91766  | 0.29396  |
| H | 5.66200 | -0.65645 | -4.05262 |
| H | 5.63243 | -0.93943 | -2.33006 |
| H | 5.54574 | -3.37703 | -2.69280 |
| H | 5.79488 | -2.68134 | -5.65395 |
| H | 4.45567 | -3.54987 | -4.88883 |
| H | 6.04915 | -4.28769 | -4.96967 |

|   |          |          |          |
|---|----------|----------|----------|
| H | 7.89389  | -3.59630 | -3.43544 |
| H | 7.70958  | -2.18646 | -2.38877 |
| H | 7.84274  | -1.97810 | -4.13813 |
| H | 5.56077  | -2.31288 | 0.95843  |
| H | 5.54484  | -3.36972 | 2.34854  |
| H | 5.56141  | -4.25962 | -0.56259 |
| H | 5.77398  | -5.91465 | 1.99340  |
| H | 6.08601  | -6.52233 | 0.36658  |
| H | 4.46741  | -5.99240 | 0.80213  |
| H | 7.67603  | -3.16498 | 0.15912  |
| H | 7.91283  | -4.89088 | -0.12745 |
| H | 7.79035  | -4.28079 | 1.52418  |
| H | 1.58292  | -2.20610 | -4.34572 |
| H | 1.53292  | -4.33334 | 2.19869  |
| H | 1.47729  | 2.22456  | 4.26725  |
| H | 1.62898  | 4.33943  | -2.20532 |
| O | 1.57342  | 4.98245  | -0.47778 |
| H | 0.72412  | 5.31057  | -0.14637 |
| O | 1.41173  | 0.45457  | 4.86534  |
| H | 0.56287  | 0.10302  | 5.17928  |
| O | 1.47205  | -4.89853 | 0.42715  |
| H | 0.61704  | -5.20247 | 0.08149  |
| O | 1.52739  | -0.45164 | -4.87683 |
| H | 0.68224  | -0.09640 | -5.19371 |
| C | 1.46462  | -1.74492 | 3.96111  |
| H | 0.64286  | -2.02953 | 4.60350  |
| C | 1.52156  | 4.02722  | 1.69905  |
| H | 0.72022  | 4.69941  | 1.97309  |
| C | 1.52420  | -3.98041 | -1.76636 |
| H | 0.72445  | -4.64527 | -2.06213 |
| C | 1.55552  | 1.73301  | -3.94716 |
| H | 0.71723  | 2.00478  | -4.57344 |
| C | -2.00683 | -2.49274 | -3.16679 |
| C | -3.10354 | -2.20238 | -2.35692 |
| C | -3.63077 | -0.92090 | -2.46231 |
| C | -3.12400 | 0.07185  | -3.29746 |
| C | -2.01772 | -0.26706 | -4.08252 |
| C | -3.73092 | 1.46259  | -3.35001 |

|   |          |          |          |
|---|----------|----------|----------|
| C | -5.25980 | 1.43849  | -3.30581 |
| C | -5.92613 | 2.80038  | -3.48273 |
| C | -7.43394 | 2.65556  | -3.34291 |
| C | -3.67944 | -3.26500 | -1.44236 |
| C | -5.20971 | -3.23370 | -1.40503 |
| C | -5.85850 | -4.35541 | -0.59874 |
| C | -7.36995 | -4.18338 | -0.60765 |
| O | -1.43848 | -3.73266 | -3.10017 |
| C | -3.12857 | 2.36972  | -2.29364 |
| C | -2.04307 | 3.19328  | -2.58353 |
| C | -1.98335 | 4.01137  | -0.32103 |
| C | -3.08284 | 3.21626  | 0.01542  |
| C | -3.61292 | 2.41757  | -0.99219 |
| O | -1.51216 | 3.17799  | -3.84337 |
| C | -3.70466 | 3.27848  | 1.39848  |
| C | -5.23490 | 3.24072  | 1.36152  |
| C | -5.88952 | 4.34264  | 0.53271  |
| C | -7.40025 | 4.16466  | 0.54819  |
| C | -3.13493 | 2.23886  | 2.34373  |
| C | -2.09695 | 2.55730  | 3.21903  |
| C | -2.07583 | 0.31977  | 4.10194  |
| C | -3.12292 | -0.04682 | 3.25187  |
| C | -3.61665 | 0.93723  | 2.39901  |
| O | -1.54150 | 3.80483  | 3.16687  |
| C | -3.71533 | -1.44203 | 3.28788  |
| C | -5.24560 | -1.42112 | 3.22819  |
| C | -5.91130 | -2.78410 | 3.39710  |
| C | -7.41855 | -2.63899 | 3.25129  |
| C | -3.10996 | -2.35842 | 2.24431  |
| C | -2.08480 | -3.24389 | 2.57161  |
| C | -2.03163 | -4.09441 | 0.32066  |
| C | -3.07076 | -3.23671 | -0.05162 |
| C | -3.56817 | -2.39046 | 0.93324  |
| O | -1.57018 | -3.21829 | 3.83688  |
| C | -5.56402 | 3.45515  | -4.80779 |
| C | -5.50060 | 5.73447  | 1.00909  |
| C | -5.55487 | -3.44387 | 4.72126  |
| C | -5.46530 | -5.73583 | -1.10409 |

|   |          |          |          |
|---|----------|----------|----------|
| H | -3.46990 | 1.88705  | -4.32219 |
| H | -3.44740 | 4.25178  | 1.82291  |
| H | -3.46888 | -1.86768 | 4.26305  |
| H | -3.41784 | -4.22647 | -1.89041 |
| H | -4.49497 | -0.67793 | -1.85651 |
| H | -4.38539 | -1.73021 | 0.66636  |
| H | -4.43420 | 0.67179  | 1.74017  |
| H | -4.47481 | 1.80581  | -0.75170 |
| H | -5.60781 | 0.76111  | -4.09364 |
| H | -5.60999 | 1.00364  | -2.36438 |
| H | -5.57406 | 3.45551  | -2.67696 |
| H | -5.82759 | 2.80557  | -5.64858 |
| H | -4.49869 | 3.68593  | -4.87986 |
| H | -6.10685 | 4.39434  | -4.93368 |
| H | -7.93121 | 3.62545  | -3.41117 |
| H | -7.70528 | 2.20819  | -2.38286 |
| H | -7.83987 | 2.01812  | -4.13429 |
| H | -5.58653 | 2.27239  | 0.99145  |
| H | -5.59234 | 3.30930  | 2.39512  |
| H | -5.54849 | 4.23611  | -0.50360 |
| H | -6.04147 | 6.49837  | 0.44652  |
| H | -4.43420 | 5.93390  | 0.88027  |
| H | -5.74532 | 5.86799  | 2.06773  |
| H | -7.79690 | 4.28094  | 1.56135  |
| H | -7.68971 | 3.17323  | 0.18926  |
| H | -7.89083 | 4.90535  | -0.08686 |
| H | -5.60230 | -0.74500 | 4.01325  |
| H | -5.58554 | -0.98584 | 2.28333  |
| H | -5.55572 | -3.43564 | 2.58999  |
| H | -5.82141 | -2.79717 | 5.56336  |
| H | -4.49012 | -3.67635 | 4.79712  |
| H | -6.09921 | -4.38289 | 4.84156  |
| H | -7.91547 | -3.60961 | 3.31060  |
| H | -7.68567 | -2.18527 | 2.29310  |
| H | -7.82843 | -2.00714 | 4.04509  |
| H | -5.56457 | -2.27605 | -1.01120 |
| H | -5.56805 | -3.28043 | -2.43956 |
| H | -5.51561 | -4.26809 | 0.43897  |

|   |          |          |          |
|---|----------|----------|----------|
| H | -5.71070 | -5.84811 | -2.16502 |
| H | -6.00324 | -6.51298 | -0.55707 |
| H | -4.39823 | -5.93481 | -0.98049 |
| H | -7.66270 | -3.20061 | -0.22830 |
| H | -7.85632 | -4.93880 | 0.01316  |
| H | -7.76806 | -4.28093 | -1.62221 |
| H | -0.73396 | -3.70753 | 3.83615  |
| H | -0.59408 | -3.70867 | -3.57855 |
| H | -0.66534 | 3.64872  | -3.82411 |
| H | -0.68276 | 3.77578  | 3.61900  |
| O | -1.35915 | 4.83853  | 0.55561  |
| H | -1.54450 | 4.56909  | 1.47436  |
| O | -1.39231 | 0.59583  | -4.92495 |
| H | -1.56811 | 1.51797  | -4.66288 |
| O | -1.40708 | -4.93467 | -0.54733 |
| H | -1.54022 | -4.62762 | -1.46326 |
| O | -1.45361 | -0.54737 | 4.94524  |
| H | -1.62946 | -1.46626 | 4.67766  |
| C | -1.49096 | -1.54773 | -4.03220 |
| H | -0.66402 | -1.80733 | -4.67782 |
| C | -1.48788 | 4.00857  | -1.61522 |
| H | -0.65990 | 4.65579  | -1.86838 |
| C | -1.57455 | -4.11822 | 1.62952  |
| H | -0.79238 | -4.81274 | 1.90569  |
| C | -1.60341 | 1.62259  | 4.11002  |
| H | -0.81920 | 1.89973  | 4.80174  |
| C | -1.00591 | 0.33561  | -0.85391 |
| H | -1.97493 | 0.13739  | -0.40483 |
| H | -0.91153 | 1.39450  | -1.08202 |
| H | -0.88458 | -0.26248 | -1.75378 |
| C | -0.08067 | -1.47484 | 0.43544  |
| H | 0.04837  | -2.05034 | -0.47847 |
| H | 0.69212  | -1.73656 | 1.15352  |
| H | -1.06720 | -1.64313 | 0.85649  |
| C | -0.12104 | 0.75936  | 1.34387  |
| H | 0.65111  | 0.46824  | 2.05137  |
| H | -0.01947 | 1.81299  | 1.09343  |
| H | -1.10769 | 0.55712  | 1.74942  |



|   |         |          |          |
|---|---------|----------|----------|
| C | 1.37250 | 0.22392  | -0.47877 |
| H | 1.45001 | 1.28211  | -0.70744 |
| H | 2.13867 | -0.06008 | 0.23892  |
| H | 1.47436 | -0.36592 | -1.38424 |
| N | 0.04703 | -0.03884 | 0.11209  |

[2<sub>2</sub>+1<sub>exo</sub>]

Energy = -4919.14337327hartree

Number of imaginary frequencies (PBE0-D3/def2-SVP) = 0

|   |          |          |          |
|---|----------|----------|----------|
| C | -2.43684 | -2.64591 | -3.10016 |
| C | -3.51602 | -2.31976 | -2.27615 |
| C | -4.02602 | -1.03088 | -2.38128 |
| C | -3.52376 | -0.06365 | -3.24186 |
| C | -2.43693 | -0.43084 | -4.03193 |
| C | -4.10175 | 1.33275  | -3.33194 |
| C | -5.63136 | 1.33207  | -3.28859 |
| C | -6.28137 | 2.69921  | -3.48082 |
| C | -7.79338 | 2.57283  | -3.37147 |
| C | -4.09916 | -3.34301 | -1.32473 |
| C | -5.62885 | -3.31220 | -1.30114 |
| C | -6.27957 | -4.40122 | -0.45310 |
| C | -7.78967 | -4.21767 | -0.44457 |
| O | -1.84129 | -3.87045 | -3.10180 |
| C | -3.49106 | 2.27462  | -2.31468 |
| C | -2.42832 | 3.11448  | -2.65181 |
| C | -2.42630 | 4.05301  | -0.43846 |
| C | -3.49689 | 3.24628  | -0.06176 |
| C | -3.98698 | 2.37100  | -1.02075 |
| O | -1.84925 | 3.12315  | -3.88428 |
| C | -4.09929 | 3.34296  | 1.32467  |
| C | -5.62898 | 3.31215  | 1.30086  |
| C | -6.27956 | 4.40121  | 0.45278  |
| C | -7.78966 | 4.21767  | 0.44402  |
| C | -3.51627 | 2.31968  | 2.27613  |
| C | -2.43712 | 2.64577  | 3.10020  |

|   |          |          |          |
|---|----------|----------|----------|
| C | -2.43743 | 0.43071  | 4.03202  |
| C | -3.52423 | 0.06359  | 3.24189  |
| C | -4.02637 | 1.03085  | 2.38127  |
| O | -1.84143 | 3.87025  | 3.10181  |
| C | -4.10229 | -1.33279 | 3.33190  |
| C | -5.63190 | -1.33207 | 3.28834  |
| C | -6.28196 | -2.69919 | 3.48049  |
| C | -7.79396 | -2.57278 | 3.37089  |
| C | -3.49146 | -2.27464 | 2.31471  |
| C | -2.42860 | -3.11432 | 2.65193  |
| C | -2.42623 | -4.05280 | 0.43855  |
| C | -3.49695 | -3.24628 | 0.06178  |
| C | -3.98726 | -2.37110 | 1.02073  |
| O | -1.84965 | -3.12298 | 3.88445  |
| C | -5.88413 | 3.35111  | -4.79703 |
| C | -5.90610 | 5.80066  | 0.91917  |
| C | -5.88494 | -3.35107 | 4.79676  |
| C | -5.90604 | -5.80068 | -0.91938 |
| H | -3.83304 | 1.70993  | -4.32135 |
| H | -3.82812 | 4.32483  | 1.71934  |
| H | -3.83372 | -1.70998 | 4.32134  |
| H | -3.82793 | -4.32489 | -1.71934 |
| H | -4.86560 | -0.76351 | -1.75128 |
| H | -4.82014 | -1.73312 | 0.74716  |
| H | -4.86594 | 0.76352  | 1.75122  |
| H | -4.81977 | 1.73288  | -0.74723 |
| H | -5.98840 | 0.64940  | -4.06889 |
| H | -5.98718 | 0.91286  | -2.34240 |
| H | -5.93657 | 3.34988  | -2.66930 |
| H | -6.12881 | 2.70065  | -5.64364 |
| H | -4.81544 | 3.57117  | -4.83824 |
| H | -6.41785 | 4.29463  | -4.93734 |
| H | -8.27929 | 3.54911  | -3.44585 |
| H | -8.08689 | 2.12495  | -2.41807 |
| H | -8.19058 | 1.94039  | -4.17224 |
| H | -5.98526 | 2.34083  | 0.94427  |
| H | -5.98391 | 3.39827  | 2.33467  |
| H | -5.91834 | 4.28427  | -0.57529 |

|   |          |          |          |
|---|----------|----------|----------|
| H | -6.43459 | 6.55722  | 0.33347  |
| H | -4.83683 | 5.99563  | 0.81519  |
| H | -6.17517 | 5.94516  | 1.97100  |
| H | -8.20223 | 4.33386  | 1.45164  |
| H | -8.06684 | 3.22310  | 0.08404  |
| H | -8.27503 | 4.95409  | -0.20163 |
| H | -5.98902 | -0.64938 | 4.06858  |
| H | -5.98757 | -0.91285 | 2.34209  |
| H | -5.93705 | -3.34988 | 2.66903  |
| H | -6.12971 | -2.70058 | 5.64332  |
| H | -4.81627 | -3.57118 | 4.83813  |
| H | -6.41871 | -4.29456 | 4.93703  |
| H | -8.27990 | -3.54905 | 3.44523  |
| H | -8.08730 | -2.12493 | 2.41744  |
| H | -8.19127 | -1.94032 | 4.17159  |
| H | -5.98519 | -2.34086 | -0.94466 |
| H | -5.98364 | -3.39836 | -2.33500 |
| H | -5.91849 | -4.28423 | 0.57501  |
| H | -6.17494 | -5.94523 | -1.97125 |
| H | -6.43463 | -6.55722 | -0.33373 |
| H | -4.83678 | -5.99566 | -0.81522 |
| H | -8.06689 | -3.22308 | -0.08470 |
| H | -8.27512 | -4.95405 | 0.20107  |
| H | -8.20209 | -4.33394 | -1.45223 |
| H | -1.91684 | -2.23308 | 4.28330  |
| H | -1.91821 | -4.27866 | -2.21793 |
| H | -1.91633 | 2.23323  | -4.28310 |
| H | -1.91827 | 4.27841  | 2.21792  |
| O | -1.85586 | 4.89399  | 0.47744  |
| H | -0.95280 | 5.09825  | 0.16501  |
| O | -1.85335 | 0.49166  | -4.85614 |
| H | -0.95110 | 0.17499  | -5.05820 |
| O | -1.85546 | -4.89360 | -0.47732 |
| H | -0.95233 | -5.09744 | -0.16478 |
| O | -1.85392 | -0.49183 | 4.85622  |
| H | -0.95159 | -0.17527 | 5.05816  |
| C | -1.93084 | -1.71488 | -3.98851 |
| H | -1.11146 | -1.98786 | -4.63713 |

|   |          |          |          |
|---|----------|----------|----------|
| C | -1.92634 | 4.01106  | -1.72561 |
| H | -1.12018 | 4.67296  | -2.00681 |
| C | -1.92637 | -4.01077 | 1.72573  |
| H | -1.12001 | -4.67242 | 2.00696  |
| C | -1.93126 | 1.71473  | 3.98861  |
| H | -1.11192 | 1.98766  | 4.63730  |
| C | 1.58035  | -2.63085 | 3.14706  |
| C | 2.63661  | -2.30326 | 2.30427  |
| C | 3.12804  | -1.00437 | 2.38487  |
| C | 2.61006  | -0.03721 | 3.24285  |
| C | 1.53503  | -0.41129 | 4.04896  |
| C | 3.19972  | 1.35670  | 3.33186  |
| C | 4.72944  | 1.33265  | 3.32464  |
| C | 5.39368  | 2.69499  | 3.49433  |
| C | 6.90489  | 2.53141  | 3.43155  |
| C | 3.20541  | -3.33766 | 1.35652  |
| C | 4.73523  | -3.32297 | 1.33993  |
| C | 5.38170  | -4.38215 | 0.45346  |
| C | 6.89475  | -4.23645 | 0.51417  |
| O | 1.03755  | -3.89397 | 3.09788  |
| C | 2.61809  | 2.29180  | 2.29240  |
| C | 1.56917  | 3.14274  | 2.62196  |
| C | 1.52988  | 4.04910  | 0.40454  |
| C | 2.59833  | 3.23539  | 0.02918  |
| C | 3.10786  | 2.36880  | 0.99286  |
| O | 1.03300  | 3.10098  | 3.88805  |
| C | 3.20529  | 3.33764  | -1.35641 |
| C | 4.73510  | 3.32300  | -1.33982 |
| C | 5.38152  | 4.38221  | -0.45335 |
| C | 6.89458  | 4.23655  | -0.51402 |
| C | 2.63650  | 2.30325  | -2.30416 |
| C | 1.58024  | 2.63084  | -3.14698 |
| C | 1.53499  | 0.41127  | -4.04888 |
| C | 2.61000  | 0.03719  | -3.24275 |
| C | 3.12795  | 1.00437  | -2.38476 |
| O | 1.03743  | 3.89392  | -3.09776 |
| C | 3.19973  | -1.35670 | -3.33175 |
| C | 4.72945  | -1.33254 | -3.32455 |

|   |         |          |          |
|---|---------|----------|----------|
| C | 5.39378 | -2.69483 | -3.49428 |
| C | 6.90498 | -2.53117 | -3.43150 |
| C | 2.61818 | -2.29186 | -2.29230 |
| C | 1.56941 | -3.14296 | -2.62191 |
| C | 1.53011 | -4.04932 | -0.40449 |
| C | 2.59844 | -3.23546 | -0.02908 |
| C | 3.10790 | -2.36881 | -0.99273 |
| O | 1.03333 | -3.10131 | -3.88805 |
| C | 4.96850 | 3.40626  | 4.77086  |
| C | 4.94717 | 5.79667  | -0.80912 |
| C | 4.96866 | -3.40609 | -4.77084 |
| C | 4.94736 | -5.79661 | 0.80921  |
| H | 2.91254 | 1.75739  | 4.30743  |
| H | 2.92054 | 4.31300  | -1.75930 |
| H | 2.91258 | -1.75742 | -4.30732 |
| H | 2.92072 | -4.31302 | 1.75945  |
| H | 3.96216 | -0.72987 | 1.74466  |
| H | 3.94623 | -1.73113 | -0.71964 |
| H | 3.96207 | 0.72988  | -1.74454 |
| H | 3.94627 | 1.73123  | 0.71981  |
| H | 5.05452 | 0.67060  | 4.13677  |
| H | 5.10804 | 0.88376  | 2.40212  |
| H | 5.09111 | 3.32008  | 2.64617  |
| H | 5.18361 | 2.78701  | 5.64905  |
| H | 3.90111 | 3.64105  | 4.77813  |
| H | 5.51180 | 4.34817  | 4.88861  |
| H | 7.40901 | 3.50165  | 3.46795  |
| H | 7.20164 | 2.01906  | 2.51300  |
| H | 7.26401 | 1.93562  | 4.27797  |
| H | 5.11252 | 2.34423  | -1.03082 |
| H | 5.07635 | 3.46334  | -2.37306 |
| H | 5.07011 | 4.18725  | 0.57927  |
| H | 5.48008 | 6.53081  | -0.19820 |
| H | 3.87737 | 5.95266  | -0.64826 |
| H | 5.16633 | 6.01715  | -1.85997 |
| H | 7.26316 | 4.45050  | -1.52335 |
| H | 7.19592 | 3.21788  | -0.25729 |
| H | 7.38607 | 4.92942  | 0.17531  |

|   |         |          |          |
|---|---------|----------|----------|
| H | 5.05448 | -0.67045 | -4.13667 |
| H | 5.10803 | -0.88364 | -2.40202 |
| H | 5.09124 | -3.31997 | -2.64615 |
| H | 5.18374 | -2.78680 | -5.64901 |
| H | 3.90129 | -3.64094 | -4.77813 |
| H | 5.51201 | -4.34796 | -4.88861 |
| H | 7.40917 | -3.50136 | -3.46794 |
| H | 7.20170 | -2.01883 | -2.51293 |
| H | 7.26407 | -1.93531 | -4.27789 |
| H | 5.11260 | -2.34417 | 1.03093  |
| H | 5.07648 | -3.46329 | 2.37317  |
| H | 5.07030 | -4.18718 | -0.57916 |
| H | 5.16649 | -6.01710 | 1.86007  |
| H | 5.48029 | -6.53074 | 0.19829  |
| H | 3.87756 | -5.95261 | 0.64832  |
| H | 7.19607 | -3.21778 | 0.25745  |
| H | 7.38628 | -4.92931 | -0.17516 |
| H | 7.26331 | -4.45040 | 1.52351  |
| H | 0.17469 | -3.54898 | -3.84827 |
| H | 0.17907 | -3.85267 | 3.54539  |
| H | 0.17435 | 3.54865  | 3.84820  |
| H | 0.17887 | 3.85266  | -3.54514 |
| O | 0.90485 | 4.91651  | -0.45321 |
| H | 1.04769 | 4.62564  | -1.37383 |
| O | 0.89727 | 0.44836  | 4.90476  |
| H | 1.04715 | 1.36867  | 4.61785  |
| O | 0.90511 | -4.91678 | 0.45322  |
| H | 1.04800 | -4.62597 | 1.37384  |
| O | 0.89719 | -0.44837 | -4.90466 |
| H | 1.04706 | -1.36868 | -4.61774 |
| C | 1.05611 | -1.70793 | 4.02967  |
| H | 0.26082 | -1.99685 | 4.70273  |
| C | 1.04892 | 4.02907  | 1.70020  |
| H | 0.25910 | 4.70777  | 1.99051  |
| C | 1.04924 | -4.02937 | -1.70018 |
| H | 0.25952 | -4.70817 | -1.99054 |
| C | 1.05608 | 1.70792  | -4.02963 |
| H | 0.26087 | 1.99685  | -4.70279 |

I 6.45500 0.00006 0.00004

[2<sub>2</sub>+2I<sub>exo</sub>]<sup>2-</sup>

Energy = -5216.96082423 hartree

Number of imaginary frequencies (PBE0-D3/def2-SVP) = 0

|   |         |          |          |
|---|---------|----------|----------|
| C | 1.99649 | 2.61468  | -3.12519 |
| C | 3.07558 | 2.29805  | -2.29870 |
| C | 3.59132 | 1.00782  | -2.38991 |
| C | 3.08829 | 0.03720  | -3.25023 |
| C | 2.01386 | 0.40386  | -4.05452 |
| C | 3.66138 | -1.36256 | -3.32970 |
| C | 5.19114 | -1.35742 | -3.31139 |
| C | 5.84380 | -2.72802 | -3.45815 |
| C | 7.35672 | -2.57644 | -3.40750 |
| C | 3.66197 | 3.33494  | -1.36171 |
| C | 5.19162 | 3.31372  | -1.36559 |
| C | 5.85146 | 4.38554  | -0.50414 |
| C | 7.36316 | 4.22642  | -0.56627 |
| O | 1.37772 | 3.83485  | -3.12311 |
| C | 3.06028 | -2.28733 | -2.28986 |
| C | 1.98972 | -3.12249 | -2.61162 |
| C | 2.00883 | -4.05668 | -0.40340 |
| C | 3.07398 | -3.24295 | -0.03156 |
| C | 3.57029 | -2.37349 | -0.99731 |
| O | 1.38131 | -3.12648 | -3.83676 |
| C | 3.66121 | -3.33505 | 1.36177  |
| C | 5.19086 | -3.31412 | 1.36575  |
| C | 5.85053 | -4.38610 | 0.50438  |
| C | 7.36225 | -4.22702 | 0.56617  |
| C | 3.07497 | -2.29806 | 2.29873  |
| C | 1.99577 | -2.61451 | 3.12515  |
| C | 2.01364 | -0.40376 | 4.05462  |
| C | 3.08809 | -0.03724 | 3.25031  |
| C | 3.59094 | -1.00793 | 2.38995  |
| O | 1.37679 | -3.83455 | 3.12301  |
| C | 3.66140 | 1.36241  | 3.32977  |

|   |         |          |          |
|---|---------|----------|----------|
| C | 5.19117 | 1.35702  | 3.31160  |
| C | 5.84403 | 2.72751  | 3.45854  |
| C | 7.35692 | 2.57579  | 3.40764  |
| C | 3.06051 | 2.28724  | 2.28985  |
| C | 1.98992 | 3.12241  | 2.61145  |
| C | 2.00951 | 4.05677  | 0.40331  |
| C | 3.07462 | 3.24293  | 0.03157  |
| C | 3.57072 | 2.37340  | 0.99739  |
| O | 1.38115 | 3.12626  | 3.83642  |
| C | 5.40340 | -3.46121 | -4.71691 |
| C | 5.42781 | -5.79676 | 0.88870  |
| C | 5.40388 | 3.46047  | 4.71752  |
| C | 5.42869 | 5.79629  | -0.88809 |
| H | 3.37294 | -1.75467 | -4.30839 |
| H | 3.37203 | -4.31188 | 1.75795  |
| H | 3.37296 | 1.75460  | 4.30843  |
| H | 3.37302 | 4.31183  | -1.75790 |
| H | 4.43088 | 0.74355  | -1.75334 |
| H | 4.41258 | 1.73749  | 0.73278  |
| H | 4.43054 | -0.74381 | 1.75338  |
| H | 4.41216 | -1.73763 | -0.73260 |
| H | 5.52855 | -0.71017 | -4.13081 |
| H | 5.57052 | -0.89861 | -2.39405 |
| H | 5.54066 | -3.33353 | -2.59648 |
| H | 5.61313 | -2.85992 | -5.60908 |
| H | 4.33460 | -3.68849 | -4.70789 |
| H | 5.94009 | -4.40894 | -4.82126 |
| H | 7.85272 | -3.55188 | -3.42479 |
| H | 7.66256 | -2.04597 | -2.50206 |
| H | 7.71592 | -2.00241 | -4.26924 |
| H | 5.56946 | -2.34059 | 1.04214  |
| H | 5.52211 | -3.43402 | 2.40494  |
| H | 5.53948 | -4.21548 | -0.53265 |
| H | 5.96649 | -6.53899 | 0.29202  |
| H | 4.35912 | -5.96352 | 0.73330  |
| H | 5.64970 | -5.99328 | 1.94396  |
| H | 7.72887 | -4.41682 | 1.58138  |
| H | 7.65645 | -3.21121 | 0.28993  |



|   |         |          |          |
|---|---------|----------|----------|
| H | 7.86176 | -4.93062 | -0.10710 |
| H | 5.52838 | 0.70966  | 4.13102  |
| H | 5.57056 | 0.89818  | 2.39428  |
| H | 5.54080 | 3.33324  | 2.59705  |
| H | 5.61366 | 2.85895  | 5.60952  |
| H | 4.33511 | 3.68789  | 4.70870  |
| H | 5.94069 | 4.40812  | 4.82202  |
| H | 7.85302 | 3.55119  | 3.42512  |
| H | 7.66261 | 2.04550  | 2.50205  |
| H | 7.71617 | 2.00151  | 4.26920  |
| H | 5.57003 | 2.34012  | -1.04198 |
| H | 5.52295 | 3.43362  | -2.40475 |
| H | 5.54063 | 4.21472  | 0.53292  |
| H | 5.65032 | 5.99302  | -1.94336 |
| H | 5.96754 | 6.53837  | -0.29138 |
| H | 4.36004 | 5.96304  | -0.73240 |
| H | 7.65736 | 3.21054  | -0.29028 |
| H | 7.86283 | 4.92985  | 0.10706  |
| H | 7.72959 | 4.41642  | -1.58151 |
| H | 1.48128 | 2.24755  | 4.25201  |
| H | 1.48566 | 4.25439  | -2.24798 |
| H | 1.48131 | -2.24773 | -4.25230 |
| H | 1.48449 | -4.25401 | 2.24780  |
| O | 1.44513 | -4.90937 | 0.51560  |
| H | 0.55566 | -5.13081 | 0.18978  |
| O | 1.43791 | -0.51980 | -4.89351 |
| H | 0.54589 | -0.19336 | -5.10531 |
| O | 1.44607 | 4.90959  | -0.51573 |
| H | 0.55660 | 5.13115  | -0.19003 |
| O | 1.43802 | 0.51994  | 4.89382  |
| H | 0.54605 | 0.19356  | 5.10587  |
| C | 1.50030 | 1.68478  | -4.01917 |
| H | 0.68844 | 1.95525  | -4.67924 |
| C | 1.49588 | -4.02077 | -1.68450 |
| H | 0.69110 | -4.68794 | -1.95901 |
| C | 1.49634 | 4.02082  | 1.68432  |
| H | 0.69157 | 4.68804  | 1.95874  |
| C | 1.49975 | -1.68454 | 4.01915  |

|   |          |          |          |
|---|----------|----------|----------|
| H | 0.68780  | -1.95481 | 4.67919  |
| C | -2.01752 | 2.58731  | 3.15346  |
| C | -3.09131 | 2.27698  | 2.32499  |
| C | -3.59180 | 0.98116  | 2.40108  |
| C | -3.07394 | 0.00399  | 3.24724  |
| C | -1.99519 | 0.36543  | 4.05549  |
| C | -3.65945 | -1.39226 | 3.31799  |
| C | -5.18911 | -1.37374 | 3.30794  |
| C | -5.85040 | -2.73976 | 3.45959  |
| C | -7.36221 | -2.58011 | 3.40063  |
| C | -3.66450 | 3.32250  | 1.39113  |
| C | -5.19419 | 3.30543  | 1.37918  |
| C | -5.84464 | 4.37720  | 0.51070  |
| C | -7.35756 | 4.23014  | 0.57228  |
| O | -1.44463 | 3.83548  | 3.09587  |
| C | -3.07323 | -2.31347 | 2.26790  |
| C | -2.00717 | -3.15089 | 2.58031  |
| C | -1.99054 | -4.05607 | 0.36001  |
| C | -3.06197 | -3.23930 | -0.00288 |
| C | -3.57121 | -2.38456 | 0.97106  |
| O | -1.44153 | -3.10164 | 3.83198  |
| C | -3.66475 | -3.32216 | -1.39117 |
| C | -5.19446 | -3.30493 | -1.37943 |
| C | -5.84516 | -4.37662 | -0.51106 |
| C | -7.35807 | -4.22983 | -0.57344 |
| C | -3.09134 | -2.27676 | -2.32503 |
| C | -2.01763 | -2.58732 | -3.15351 |
| C | -1.99477 | -0.36540 | -4.05543 |
| C | -3.07349 | -0.00377 | -3.24725 |
| C | -3.59156 | -0.98085 | -2.40111 |
| O | -1.44515 | -3.83568 | -3.09599 |
| C | -3.65885 | 1.39255  | -3.31801 |
| C | -5.18851 | 1.37411  | -3.30808 |
| C | -5.84977 | 2.74018  | -3.45948 |
| C | -7.36158 | 2.58049  | -3.40087 |
| C | -3.07266 | 2.31367  | -2.26784 |
| C | -2.00638 | 3.15088  | -2.58010 |
| C | -1.98996 | 4.05616  | -0.35984 |

|   |          |          |          |
|---|----------|----------|----------|
| C | -3.06158 | 3.23957  | 0.00291  |
| C | -3.57082 | 2.38489  | -0.97109 |
| O | -1.44050 | 3.10149  | -3.83166 |
| C | -5.42143 | -3.46769 | 4.72543  |
| C | -5.41007 | -5.78600 | -0.88580 |
| C | -5.42054 | 3.46848  | -4.72502 |
| C | -5.40998 | 5.78656  | 0.88602  |
| H | -3.36944 | -1.80237 | 4.28880  |
| H | -3.37737 | -4.29197 | -1.80545 |
| H | -3.36873 | 1.80268  | -4.28879 |
| H | -3.37700 | 4.29225  | 1.80546  |
| H | -4.43102 | 0.71685  | 1.76408  |
| H | -4.41350 | 1.74937  | -0.70816 |
| H | -4.43076 | -0.71640 | -1.76414 |
| H | -4.41374 | -1.74890 | 0.70800  |
| H | -5.51843 | -0.72243 | 4.12733  |
| H | -5.56889 | -0.91487 | 2.39084  |
| H | -5.54612 | -3.35209 | 2.60301  |
| H | -5.63596 | -2.86063 | 5.61251  |
| H | -4.35335 | -3.69837 | 4.72639  |
| H | -5.96205 | -4.41304 | 4.83104  |
| H | -7.86376 | -3.55263 | 3.42230  |
| H | -7.66105 | -2.05383 | 2.49045  |
| H | -7.72211 | -1.99824 | 4.25678  |
| H | -5.57266 | -2.33124 | -1.05570 |
| H | -5.53408 | -3.42796 | -2.41565 |
| H | -5.53560 | -4.19692 | 0.52475  |
| H | -5.94492 | -6.52901 | -0.28666 |
| H | -4.34066 | -5.94270 | -0.72477 |
| H | -5.62619 | -5.99079 | -1.94071 |
| H | -7.72377 | -4.42982 | -1.58705 |
| H | -7.65977 | -3.21436 | -0.30403 |
| H | -7.85183 | -4.93226 | 0.10526  |
| H | -5.51779 | 0.72298  | -4.12763 |
| H | -5.56837 | 0.91507  | -2.39110 |
| H | -5.54568 | 3.35226  | -2.60265 |
| H | -5.63485 | 2.86168  | -5.61232 |
| H | -4.35247 | 3.69921  | -4.72567 |

|   |          |          |          |
|---|----------|----------|----------|
| H | -5.96118 | 4.41384  | -4.83047 |
| H | -7.86314 | 3.55302  | -3.42233 |
| H | -7.66059 | 2.05393  | -2.49091 |
| H | -7.72131 | 1.99889  | -4.25729 |
| H | -5.57239 | 2.33178  | 1.05537  |
| H | -5.53399 | 3.42847  | 2.41533  |
| H | -5.53449 | 4.19780  | -0.52499 |
| H | -5.62685 | 5.99111  | 1.94081  |
| H | -5.94450 | 6.52963  | 0.28666  |
| H | -4.34048 | 5.94343  | 0.72575  |
| H | -7.65897 | 3.21470  | 0.30244  |
| H | -7.85110 | 4.93271  | -0.10643 |
| H | -7.72378 | 4.42974  | 1.58577  |
| H | -0.55016 | 3.48666  | -3.75589 |
| H | -0.55437 | 3.75741  | 3.48016  |
| H | -0.55144 | -3.48747 | 3.75660  |
| H | -0.55504 | -3.75806 | -3.48064 |
| O | -1.38253 | -4.92658 | -0.50261 |
| H | -1.48437 | -4.60138 | -1.41831 |
| O | -1.37399 | -0.49898 | 4.91471  |
| H | -1.48111 | -1.41448 | 4.59192  |
| O | -1.38201 | 4.92666  | 0.50281  |
| H | -1.48381 | 4.60138  | 1.41848  |
| O | -1.37331 | 0.49891  | -4.91456 |
| H | -1.48018 | 1.41442  | -4.59166 |
| C | -1.50151 | 1.65619  | 4.03215  |
| H | -0.68974 | 1.93229  | 4.69009  |
| C | -1.49497 | -4.03278 | 1.64997  |
| H | -0.68885 | -4.69704 | 1.92734  |
| C | -1.49416 | 4.03269  | -1.64970 |
| H | -0.68780 | 4.69670  | -1.92696 |
| C | -1.50136 | -1.65629 | -4.03214 |
| H | -0.68964 | -1.93251 | -4.69009 |
| I | 7.00615  | -0.00028 | -0.00002 |
| I | -7.00520 | 0.00010  | -0.00023 |
